# Supplementary material for: International prevalence of consultation with a naturopathic practitioner: a systematic review and meta-analysis
Source: PubMed Central journal article supplement — BMJ Open. 2022 Jul 25;12(7):e056075. doi: 10.1136/bmjopen-2021-056075 (PMC9328102; doi:10.1136/bmjopen-2021-056075), 2022-07-25
Supplement: bmjopen-2021-056075.draft_revisions.pdf [file bmjopen-2021-056075.draft_revisions.pdf]

# BMJ Open

BMJ Open is committed to open peer review. As part of this commitment we make the peer review history of every article we publish publicly available.

When an article is published we post the peer reviewers' comments and the authors' responses online. We also post the versions of the paper that were used during peer review. These are the versions that the peer review comments apply to.

The versions of the paper that follow are the versions that were submitted during the peer review process. They are not the versions of record or the final published versions. They should not be cited or distributed as the published version of this manuscript.

BMJ Open is an open access journal and the full, final, typeset and author-corrected version of record of the manuscript is available on our site with no access controls, subscription charges or pay-per-view fees (<http://bmjopen.bmj.com>).

If you have any questions on BMJ Open's open peer review process please email [info.bmjopen@bmj.com](mailto:info.bmjopen@bmj.com)

# BMJ Open

## International prevalence of consultation with a naturopathic practitioner: a systematic review and meta-analysis

|                               |                                                                                                                                                                                                                                                                                                                                                                                                                                                                                                                                                                                                                                                                                                                                                                                                                                                                                                                                                                                                                                                                                                                                                                                                               |
|-------------------------------|---------------------------------------------------------------------------------------------------------------------------------------------------------------------------------------------------------------------------------------------------------------------------------------------------------------------------------------------------------------------------------------------------------------------------------------------------------------------------------------------------------------------------------------------------------------------------------------------------------------------------------------------------------------------------------------------------------------------------------------------------------------------------------------------------------------------------------------------------------------------------------------------------------------------------------------------------------------------------------------------------------------------------------------------------------------------------------------------------------------------------------------------------------------------------------------------------------------|
| Journal:                      | <i>BMJ Open</i>                                                                                                                                                                                                                                                                                                                                                                                                                                                                                                                                                                                                                                                                                                                                                                                                                                                                                                                                                                                                                                                                                                                                                                                               |
| Manuscript ID                 | bmjopen-2021-056075                                                                                                                                                                                                                                                                                                                                                                                                                                                                                                                                                                                                                                                                                                                                                                                                                                                                                                                                                                                                                                                                                                                                                                                           |
| Article Type:                 | Original research                                                                                                                                                                                                                                                                                                                                                                                                                                                                                                                                                                                                                                                                                                                                                                                                                                                                                                                                                                                                                                                                                                                                                                                             |
| Date Submitted by the Author: | 09-Aug-2021                                                                                                                                                                                                                                                                                                                                                                                                                                                                                                                                                                                                                                                                                                                                                                                                                                                                                                                                                                                                                                                                                                                                                                                                   |
| Complete List of Authors:     | Steel, Amie; University of Technology Sydney, Australian Research Centre in Complementary and Integrative Medicine (ARCCIM)<br>Redmond, Rebecca; University of Technology Sydney<br>Schloss, Janet ; Southern Cross University<br>Cramer, Holger; University of Duisburg-Essen, Department of Internal and Integrative Medicine, Kliniken Essen-Mitte, Faculty of Medicine<br>Goldenberg, Joshua; National University of Natural Medicine<br>Leach, Matthew; Southern Cross University, National Centre for Naturopathic Medicine<br>Harnett, Joanna; The University of Sydney, School of Pharmacy, Faculty of Medicine and Health<br>Van de Venter, Claudine; University of Technology Sydney<br>McLintock, Andy; University of Technology Sydney, Australian Research Centre in Complementary and Integrative Medicine (ARCCIM)<br>Bradley, Ryan; National University of Natural Medicine; National University of Natural Medicine<br>Hawrelak, Jason; University of Tasmania<br>Cooley, Kieran; Canadian College of Naturopathic Medicine, Research<br>Leung, Brenda; University of Lethbridge<br>Adams, Jon; University of Technology Sydney, Faculty of Health<br>Wardle, Jon; Southern Cross University |
| Keywords:                     | COMPLEMENTARY MEDICINE, PRIMARY CARE, Human resource management < HEALTH SERVICES ADMINISTRATION & MANAGEMENT                                                                                                                                                                                                                                                                                                                                                                                                                                                                                                                                                                                                                                                                                                                                                                                                                                                                                                                                                                                                                                                                                                 |
|                               |                                                                                                                                                                                                                                                                                                                                                                                                                                                                                                                                                                                                                                                                                                                                                                                                                                                                                                                                                                                                                                                                                                                                                                                                               |

SCHOLARONE™  
Manuscripts

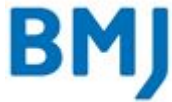

I, the Submitting Author has the right to grant and does grant on behalf of all authors of the Work (as defined in the below author licence), an exclusive licence and/or a non-exclusive licence for contributions from authors who are: i) UK Crown employees; ii) where BMJ has agreed a CC-BY licence shall apply, and/or iii) in accordance with the terms applicable for US Federal Government officers or employees acting as part of their official duties; on a worldwide, perpetual, irrevocable, royalty-free basis to BMJ Publishing Group Ltd ("BMJ") its licensees and where the relevant Journal is co-owned by BMJ to the co-owners of the Journal, to publish the Work in this journal and any other BMJ products and to exploit all rights, as set out in our [licence](#).

The Submitting Author accepts and understands that any supply made under these terms is made by BMJ to the Submitting Author unless you are acting as an employee on behalf of your employer or a postgraduate student of an affiliated institution which is paying any applicable article publishing charge ("APC") for Open Access articles. Where the Submitting Author wishes to make the Work available on an Open Access basis (and intends to pay the relevant APC), the terms of reuse of such Open Access shall be governed by a Creative Commons licence – details of these licences and which [Creative Commons](#) licence will apply to this Work are set out in our licence referred to above.

Other than as permitted in any relevant BMJ Author's Self Archiving Policies, I confirm this Work has not been accepted for publication elsewhere, is not being considered for publication elsewhere and does not duplicate material already published. I confirm all authors consent to publication of this Work and authorise the granting of this licence.

# INTERNATIONAL PREVALENCE OF CONSULTATION WITH A NATUROPATHIC PRACTITIONER: A SYSTEMATIC REVIEW AND META-ANALYSIS

Authors:

Steel, Amie<sup>1</sup>

Redmond, Rebecca<sup>1</sup>

Schloss, Janet<sup>1,3</sup>

Cramer, Holger<sup>1,2,3P2</sup>

Goldenberg, Joshua<sup>1,4</sup>

Leach, Matthew<sup>1,3</sup>

Harnett, Joanna<sup>1,5</sup>

Van de Venter, Claudine<sup>1</sup>

McLintock, Andy<sup>1</sup>

Bradley, Ryan<sup>1,3,4,6</sup>

Hawrelak, Jason<sup>1,7</sup>

Cooley, Kieran<sup>1,8</sup>

Leung, Brenda<sup>1,9</sup>

Adams, Jon<sup>1</sup>

Wardle, Jon<sup>1,3</sup>

<sup>1</sup>University of Technology Sydney, Faculty of Health, Australian Research Centre in Complementary and Integrative Medicine, Ultimo NSW Australia

<sup>2</sup>Department of Internal and Integrative Medicine, Evang. Kliniken Essen-Mitte, Faculty of Medicine, University of Duisburg-Essen, Germany

<sup>3</sup>Southern Cross University, National Centre for Naturopathic Medicine, Lismore, Australia

<sup>4</sup>Helfgott Research Institute, National University of Natural Medicine, Portland, OR, USA

<sup>5</sup>Faculty of Medicine and Health, Sydney Pharmacy School, The University of Sydney, Sydney, Australia

<sup>6</sup>Herbert Wertheim School of Public Health and Human Longevity Science, University of California, San Diego, La Jolla, CA, USA

<sup>7</sup>College of Health and Medicine, University of Tasmania, Hobart, TAS, Australia

<sup>8</sup>Canadian College of Naturopathic Medicine, Toronto, ON, Canada

<sup>9</sup>Faculty of Health Sciences, University of Lethbridge, Lethbridge, AB, Canada

## Corresponding author:

Dr Amie Steel

[Amie.steel@uts.edu.au](mailto:Amie.steel@uts.edu.au)

1  
2  
3  
4  
5  
6  
7  
8  
9  
10  
11  
12  
13  
14  
15  
16  
17  
18  
19  
20  
21  
22  
23  
24  
25  
26  
27  
28  
29  
30  
31  
32  
33  
34  
35  
36  
37  
38  
39  
40  
41  
42  
43  
44  
45  
46  
47  
48  
49  
50  
51  
52  
53  
54  
55  
56  
57  
58  
59  
60

## ABSTRACT (300 words)

**Objectives:** Naturopathy is a traditional medicine system informed by codified philosophies and principles, and an emphasis on non-pharmacologic therapeutic interventions. While naturopathy is practiced by approximately 75 000 to 100 000 naturopathic practitioners in at least 98 countries, little is known about the international prevalence of history of consultation with a naturopathic practitioner. This study reports a systematic review and meta-analysis of studies describing the global prevalence of history of consultation with a naturopathic practitioner by the general population.

**Setting:** The included literature was identified through a systematic search of eight databases between September and October 2019, as well as the grey literature.

**Participants:** Studies were included if they reported the prevalence rate of consultations with a naturopathic practitioner by the general population

**Interventions:** Survey items needed to report consultations with a naturopathic practitioner as defined in the country where data was collected, and not combine naturopathic consultations with other health services or only report consultations for illness populations.

**Primary and secondary outcome measures:** Primary measures used for the analysis was consultations in the previous 12-months. Other prevalence timeframes were reported as secondary measures.

**Methods:** Meta-analysis of prevalence data was conducted using random effects models based on individual countries and World Health Organisation (WHO) world regions.

**Results:** The literature search identified eight manuscripts summarizing 13 studies reporting prevalence for inclusion in the review. All included studies had a low risk of bias. Meta-analysis of the included studies by world region found the 12-month prevalence of history of naturopathy consultations ranged from 1% in the Region of the Americas to 6% in the European and Western Pacific Regions.

**Conclusions:** There are up to 6-fold differences in the prevalence of naturopathy consults over 12-months between and within world regions, which may be driven by a range of policy, legislative and social factors.

## STRENGTHS AND LIMITATIONS OF THIS STUDY

- Naturopathy is one of the most commonly used traditional and complementary medicines in the Western world and this is the first systematic review and meta-analysis reporting the prevalence of consultations with a naturopathic practitioner.
- This study includes only includes data published after 2010 to ensure the results are contemporary, however this may have excluded some studies in countries with older data.
- The results are limited by the poor availability of data reporting consultations with a naturopathic practitioner, including in countries where a large number of naturopathic practitioners are known to provide care.

For peer review only

## INTRODUCTION

Naturopathy is a traditional medicine system underpinned by six philosophical principles (see Table 1), which were codified by the profession in the 20<sup>th</sup> century [1]. These philosophical principles characterize naturopathic practice and are globally accepted by the profession [2]. Other defining tenets of naturopathic practice are patient-centeredness and individualization, with naturopaths typically drawing upon a range of therapeutic interventions (e.g., diet and lifestyle counselling, herbal medicine, nutritional supplementation, manual therapies, and mind-body practices) to best meet the health care needs and preferences of the patient [3]. Globally, naturopathy is practiced in at least 98 countries with representation in every world region [4]. Naturopathy is practiced widely in Europe (n=54 practicing countries), followed by Latin America (n=51), Africa (n=47), and the Western Pacific (n=37) [5]. Estimates from the World Naturopathic Federation suggest there are between 75,000 and 100,000 naturopaths currently in clinical practice across the world [5].

Training of the naturopathic workforce is currently provided by an estimated 90 education institutions globally, with entry-level qualifications ranging from technical diploma to clinical doctorate [3]. The curriculum of these naturopathic programs typically includes content in health sciences (e.g., anatomy, physiology, chemistry, and biochemistry), clinical sciences (e.g. clinical examination, differential diagnosis), social sciences (e.g. psychology, counselling), and naturopathic sciences (e.g. nutritional medicine, herbal medicine, lifestyle medicine, dietary modification, homeopathy, and manual therapies) [4]. Despite similarities in the content of these training programs, naturopathic scope of practice varies considerably across jurisdictions due to differences in regulation and legislative requirements [6].

In response to an increase in the use of traditional and complementary medicine (including the utilization of naturopathic health services), the World Health Organisation has developed global strategies to ensure access to safe and effective healthcare, which include promoting the integration of traditional and complementary therapies (including naturopathy) into healthcare systems [7]. Several international research studies suggest the demand for naturopathic services may be attributed to personal healthcare beliefs, dissatisfaction with biomedical care, increased disease severity, and unmet healthcare needs [8-15]. Nevertheless, the global use of naturopathic services is not well understood. Therefore the aim of this study was to describe the prevalence of a history of consultations with naturopathic practitioners globally, including potential differences across world regions.

## METHODS

### AIM

This study aims to describe the global prevalence of a history of consultation with a naturopathic practitioner by the general population.

### STUDY DESIGN

1  
2  
3 A systematic review and meta-analysis of prevalence studies were undertaken in accordance with the AMSTAR  
4 2 guidelines [16]. The protocol for this review was submitted to PROSPERO on the 2<sup>nd</sup> September, 2019 and was  
5 registered on the 28<sup>th</sup> April, 2020 [CRD42020145529].  
6  
7

#### 8 INCLUSION AND EXCLUSION CRITERIA 9

10 Articles were included that reported original data from cohort studies, cross-sectional studies, survey research,  
11 case-control studies, prevalence studies, or epidemiologic studies. Studies reporting on the general population  
12 prevalence of consultations with a naturopathic practitioner either in the previous 12 months or over the user's  
13 lifetime were considered for inclusion. All relevant papers were included irrespective of language of publication  
14 or risk of bias score. Articles were excluded that presented results from specific sub-patient populations (e.g.  
15 children, female or male specific, age limitations, illness populations). Studies were also excluded if they only  
16 presented the prevalence of consultations with other health professionals that may use treatments commonly  
17 associated with naturopathy (e.g. herbal medicine, hydrotherapy, yoga, etc) but were not explicitly named as  
18 naturopathic practitioners, or where naturopathic consultation rates were conflated with a cumulative group of  
19 health services (such as complementary and alternative medicine [CAM]). To ensure the analysis reflected  
20 contemporary patterns of use, studies were excluded if they were published before 2010.  
21  
22  
23  
24  
25  
26  
27

#### 28 SEARCH STRATEGY 29

30 A systematic electronic search of the following databases was conducted between 6<sup>th</sup> September and 2<sup>nd</sup>  
31 October 2019: MEDLINE, AMED, EMBASE, CINAHL, Global Health, WHO Iris, PROQUEST dissertations database,  
32 and Lilac. The complete search strategy for MEDLINE is presented in Table 2. A search for grey literature was  
33 also performed. The search targeted countries where, according to the WHO Global Report on Traditional and  
34 Complementary Medicine (2019) [20], naturopathic practitioners provide care to the community. The search  
35 was performed using the Google search engine and the terms *prevalence*, *use*, *naturopathy*, *report*, and the  
36 country name.  
37  
38  
39  
40

#### 41 ARTICLE IDENTIFICATION AND SELECTION 42

43 A list of all citations identified through the search were exported from each database by AM and uploaded to  
44 Covidence [17] for filtering and selection. Initial screening of title and abstracts against the inclusion/exclusion  
45 criteria was conducted by AM. Two members of the authorship team (AM and AS) then independently reviewed  
46 the full text of the remaining citations to determine their suitability against the same criteria. Any differences  
47 were resolved through discussion between both reviewing authors. The list of bibliographic references and  
48 subsequent citations (identified through Google Scholar) of included papers were also checked by AS to identify  
49 additional articles otherwise missed through the database search. JHar and JS extracted data from the included  
50 papers. AS and JS assessed the papers for quality of reporting against the STROBE checklist [18]; risk of bias was  
51 assessed using the tool developed by Hoy et al [19] by JG and JAH. Differences in scoring for both tools were  
52 resolved through discussion until consensus was achieved.  
53  
54  
55  
56  
57  
58

#### 59 ANALYSIS 60



1  
2  
3 The results were grouped for narrative presentation of results in accordance with the World Health Organisation  
4 (WHO) world regions [21]. Where studies reported the results of more than one year, these were treated as  
5 different studies in the analysis. Articles with unclear numerators or denominators were calculated by the  
6 research team where the necessary information was provided or checked against source documents for the  
7 same study. Authors were contacted to verify information not able to be determined through these other  
8 methods.  
9  
10

11  
12  
13 Prevalence rates and standard errors were calculated using a standardized Microsoft Excel (version 12.3.5,  
14 Microsoft, Redmond, USA) spreadsheet [22]. Review Manager software (version 5.3, Nordic Cochrane Centre,  
15 Copenhagen, Denmark) was used to conduct the meta-analysis, using random effects models by the Generic  
16 Inverse Variance method. Weighted prevalence rates with 95% confidence intervals (95% CI) were calculated  
17 for 12-month prevalence and lifetime prevalence separately. Separate analyses were conducted for a) country  
18 of origin and b) WHO world regions.  
19  
20  
21

22  
23 Heterogeneity between studies was estimated on the basis of the raw proportions, by using the  $I^2$  statistic.  
24 Intervals were defined as per published guidance [23, 24]: low heterogeneity ( $I^2$  of 0–24%); moderate  
25 heterogeneity ( $I^2$  of 25–49%); substantial heterogeneity ( $I^2$  of 50–74%); relevant heterogeneity ( $I^2$  of 75–100%).  
26 In order to assess heterogeneity,  $\chi^2$  tests were conducted with  $p \leq 0.10$  [24]. We intended to perform sensitivity  
27 analyses to compare differences between outcomes on all studies to studies with low risk of bias only (defined  
28 as <4 items recorded as 'no' on the Hoy et al tool). However, as all studies were classified as low risk of bias, this  
29 was not possible.  
30  
31  
32  
33

#### 34 ETHICS APPROVAL

35 As this study presents a review and synthesis of published research and does not engage with data collection of  
36 human or animal subjects, it is deemed negligible risk and no ethics approval was required.  
37  
38  
39

## 40 RESULTS

### 41 SEARCH CHARACTERISTICS

42 The article selection process is presented in Figure 1. The database search identified 13,968 citations including  
43 2,509 duplicates. Of these, 11,374 were excluded through title and abstract screening. The full text of the  
44 remaining 85 articles were assessed for eligibility, of which 78 were excluded for the following reasons: not  
45 reporting naturopathic consultations (n=54), conference abstract only (n=9), not original research (n=7), wrong  
46 outcomes reported (n=5), overlooked duplicate (n=2), and wrong study design (n=1) (full list of excluded studies  
47 available in Supplementary File 1). This resulted in seven articles being retained. A search for grey literature  
48 using the Google search engine was also performed, and targeted countries where, according to the WHO Global  
49 Report on Traditional and Complementary Medicine (2019) [6], naturopaths/naturopathic doctors are providing  
50 care to the community. The reference lists and subsequent citations of the remaining articles were checked and  
51 when combined with the results of the Google Search, resulted in identification of an additional 19 articles (3  
52  
53  
54  
55  
56  
57  
58  
59  
60

1  
2  
3 references and 16 citations), of which one report was found to meet the inclusion criteria for this review. This  
4 yielded a total of eight included studies, one of which was published in a report.  
5  
6

#### 7 STUDY CHARACTERISTICS

8  
9 The included studies reporting 12-month prevalence of naturopathy use in a national population were  
10 represented across four of the six WHO world regions: European (n=2) [25, 26], Eastern Mediterranean (n=1)  
11 [27], Region of the Americas (n=3) [28-30], and the Western Pacific (n=1) [31] (see Table 3). One of the studies  
12 from Canada presented the lifetime prevalence of naturopathy use [30], and an additional study from India  
13 (South East Asian World region) did not specify the time period during which naturopathy was used [21] (see  
14 Table 4).  
15  
16  
17

18  
19 All included studies sampled the general adult population and reported data from a nationally representative  
20 sample or demonstrated a distribution of economic categories, except for one study from Israel whereby the  
21 majority of participants' subjective economic status was rated as 'very good' or 'good' [27]. Four studies included  
22 prevalence data from more than one time point [26-28, 30], with the earliest data collected in 1993 [27]. Two  
23 papers reported data from the same national cohort study, but from different time points [28, 29]. All studies  
24 included participants from both urban and rural locations.  
25  
26  
27

#### 28 RISK OF BIAS

29  
30 Critical appraisal of the included studies is presented in Table 5. All studies were determined to have a low risk  
31 of bias, except for one study that was suspected of having non-response bias [27]. All but one study [31] had  
32 problematic reporting of the numerator and denominator, however, this was able to be addressed by the  
33 research team by interrogating the provided data or checking source documents from the primary cohort  
34 studies. One study was identified as not having an acceptable case definition [21] as it did not specify the period  
35 of time covering naturopathy use (e.g. previous 12 months or users' lifetime).  
36  
37  
38

39  
40 Assessment of the reporting quality of included studies identified several issues. More than one-half of studies did  
41 not clearly identify the study design in the title [21, 27-31]. None of the included studies provided reasons for  
42 non-participation or provided information about missing data. Four of the included studies did not acknowledge  
43 the limitations of their research. In one case, some of the omissions in reporting may be explained by the nature  
44 of the publication (i.e. grey-literature report rather than a peer-reviewed journal article) [30].  
45  
46  
47

#### 48 SUMMARY OF FINDINGS

49  
50 The 12-month prevalence reported in studies from the European region ranged between 2% in the UK [25] to  
51 7.7% in Switzerland [26]. One study from the Eastern Mediterranean region (i.e. Israel) [27] reported multiple  
52 prevalence rates ranging from 20% in 1993 through to 18% in 2007. Three studies from the Region of the  
53 Americas reported 12-month prevalence rates of naturopathy use between 3% (in 1997) and 5% (in 2016) in  
54 Canada [30], and between 0.25% (in 2002) and 0.4% (in 2015) in the United States [28, 29]. One study from the  
55 Western Pacific region (i.e. Australia) reported a 6.2% prevalence rate [31].  
56  
57  
58  
59  
60

Two studies reported prevalence of naturopathy use over other time periods. One study from the Region of the Americas (Canada) indicated 6% of the general population in 1997, 9% in 2006, and 11% in 2016 used naturopathy at some point in the user's lifetime [30]. A study from the South-East Asian world region indicated 10% of the population had used naturopathy and yoga, but the timeframe of use was not specified [21].

## META-ANALYSIS RESULTS

The estimated 12-month prevalence rates of naturopathy use for different countries are shown in Figure 2. Prevalence rates significantly differed between countries ( $p < 0.001$ ) and ranged from less than 1% of the population in the USA to 8% in Switzerland. While the primary studies were subject to wide heterogeneity, significant heterogeneity was only found for Canada ( $p = 0.01$ ) and the USA ( $p < 0.001$ ).

Regarding WHO world regions, 12-month prevalence of naturopathy use ranged from 1% in the Region of the Americas to 6% in European and Western Pacific Regions, again with significant differences between regions ( $p < 0.001$ ; Figure 3). Relevant and statistically significant heterogeneity was present in studies involving the European Region ( $p < 0.001$ ), and Region of the Americas ( $p < 0.001$ ).

Since all studies were classified as having low risk of bias, no sensitivity analyses were conducted. No meta-analysis could be performed on studies reporting prevalence of naturopathy use over other time periods due to the paucity and heterogeneity of studies reporting this outcome.

## DISCUSSION

This review presents the most recent synthesis of evidence of the global prevalence of consultations with naturopaths/naturopathic doctors. The prevalence of naturopathy/naturopathic medicine use was reported in seven countries, across five WHO designated regions of the world. Of the regions reporting 12-month prevalence rates, the highest was in the Eastern Mediterranean region (Israel), with 18% (2007) to 20% (1993) of the general population seeking the services of a naturopath/naturopathic doctor. The lowest reported 12-month prevalence of naturopathy use was observed in the Americas (USA), with a rate of 0.4% (2012). Lifetime prevalence of use was reported in two countries: Canada (6% in 1997 to 11% in 2016); and India (7% rural, 12% urban in 2011/12). Where more than one timeframe of data was available, there was a relative amount of consistency across time suggesting naturopathy/naturopathic medicine use is temporally stable in these countries.

The wide range in the rates of consultation with a naturopath/naturopathic doctor may reflect differences in the perception and availability of naturopathy in specific countries. For example, while national prevalence of consultations with naturopaths in the USA is relatively low, this may obscure significant heterogeneity within that region. For example, insurance data from Washington state shows prevalence of naturopathic consultation to be four times higher than the national prevalence (1.6% v 0.4%) [32]. Such heterogeneity may be similarly observed in other regions and may be due to several factors. In the USA recognition of the naturopathic profession through licensure is not uniformly applied across that nation [33], and distribution of the naturopathic workforce has historically been determined by the proximity to naturopathic educational institutions [34]. Insurance coverage is also known to be a significant driver of naturopathic use [32], and variable

1  
2  
3 insurance coverage arrangements for naturopathy – as observed in the USA [35] – may also result in regional  
4 differences. Further attention towards regional variations and heterogeneity, particularly as it relates to specific  
5 barriers and facilitators to appropriate utilization of naturopathic services - is warranted.  
6  
7

8  
9 The wide range in rates of naturopathy use may also reflect differences in scope of practice in each world region.  
10 For example, in the USA, naturopathic physicians are considered to bridge conventional medicine and CAM  
11 modalities [36], while in Germany, naturopathic practitioners known as “Heilpraktiker” are a distinct category  
12 and reportedly have inconsistent training and clinical abilities [37]. As such, the term naturopathy may be  
13 differentially classifying practitioners due to professionalization, resulting in an underestimate of use in some  
14 countries and overestimate in others. Further consideration of the implications associated with the inconsistent  
15 ‘protection’ of professional titles and defined scopes of practice for naturopaths/naturopathic doctors by  
16 country is likely to influence the prevalence of use by the public [2].  
17  
18  
19  
20

21  
22 Prevalence data from some countries may also be impacted by definitional difficulties or confusion around the  
23 term ‘naturopathy’. For example, naturopathy is often grouped under a broader nomenclature as one of the  
24 many modalities or therapies considered ‘complementary approaches to healthcare’ [38] or “integrative  
25 medicine” and thus may not be individually represented in the publications included in our analysis. Multiple  
26 practitioner types may also present difficulties for data collection. For example, a review of CAM services in  
27 Europe, of the (22,300) practitioners of naturopathy, 15,000 were identified as (mostly German) medical doctors  
28 [39]. Thus, patients may not identify obtaining naturopathy as a service per se, but as part of the standard care  
29 they receive from a medical doctor who integrates naturopathic principles or modalities into their practice. This  
30 may be one reason why three of the largest European countries by naturopathic workforce (Germany, Portugal  
31 and Spain [2]) were not represented in this review. Thus, the true prevalence of naturopathic consultations is  
32 likely under-reported. Further, an examination of government administered national health surveys of the  
33 general population in the countries represented by WNF member organisations, found only Switzerland,  
34 Northern Ireland, USA, Mexico and India currently included items that specifically measured consultations with  
35 a naturopath/naturopathic doctor (see Supplementary File 2). To evaluate the potential role of naturopaths in  
36 care delivery, it is imperative that naturopathic health services and workforce research data is captured in all  
37 countries where there is a significant naturopathic presence.  
38  
39  
40  
41  
42  
43  
44  
45  
46

47  
48 Furthermore, although naturopathic practice is relatively consistent globally, local, and regional variations in  
49 preferred therapies may result in point-of-service differences that may impact prevalence of naturopathic  
50 consultations in those countries. For example, in the United Kingdom, historical connections between  
51 osteopathy and naturopathy may drive naturopathic use for musculoskeletal conditions in that country more  
52 than in countries like Australia, where naturopathy and herbalism have had a larger shared history and  
53 connection [40]. Some studies in this review explicitly combined queries about naturopathic utilization with  
54 other CAM practices – for example, herbalism and naturopathy in the Australian study. Thus, it is important that  
55 a reliable validated instrument is developed for collecting more specific data about naturopathic service  
56 utilization within and across countries to establish ‘true’ prevalence of use information.  
57  
58  
59  
60

1  
2  
3 While prevalence data provides a snapshot of a given populations' use of naturopathy, less is known about the  
4 factors associated with that use. For example, factors that have previously been raised as impacting the use of  
5 naturopathy/naturopathic medicine, include licensure and regulation, scope of practice, training of new  
6 students and therefore number of naturopaths/naturopathic doctors in the workforce, or country specific  
7 health systems that influence the support and reimbursements of naturopathic services (e.g. insurance vs out  
8 of pocket) [41]. By focusing on general population utilization, this study may also not reflect differences in  
9 prevalence of use for different clinical conditions. For example, Australian studies published before 2010 show  
10 a self-reported prevalence of naturopathic use among the general population of mid-aged women to be 8.7%,  
11 while rates for cancer (15.7%) and depression (22.2%) were significantly higher [9]. Similar variations were seen  
12 in insurance data from Washington state in the US, where 7.1% of insured cancer patients made claims for  
13 naturopathic treatment, compared to 1.6% of general enrollees [32].

14  
15  
16  
17  
18  
19  
20  
21 One of the limitations of prevalence studies in the context of naturopathy, is they fail to capture the breadth of  
22 treatments that is unique to naturopathy and they do not capture data associated with the quality of care, role  
23 within healthcare systems, nor the efficacy and safety of naturopathic approaches to the management of specific  
24 conditions [42]. Thus, research into the quality, safety, efficacy, and cost effectiveness of  
25 naturopathy/naturopathic medicine would provide pragmatic understanding about the contribution of  
26 naturopathy to healthcare within populations and more broadly across the world. Additionally, although limiting  
27 data collection to studies published after 2010 helps to ensure prevalence data most accurately reflects  
28 contemporary utilization, such time limits may have excluded some studies in regions that were missing from  
29 the review. Additionally, observing changes in prevalence of naturopathic consultations over time may also be  
30 able to offer insights into the changing role of naturopathy/naturopathic medicine in relation to health systems  
31 changes or generational health needs [43].

## 32 33 34 35 36 37 38 39 CONCLUSION

40 Although the naturopathic workforce has a significant presence globally, there is limited detailed data on the  
41 prevalence of naturopathic consultations. As such, there is a need for a reliable validated instrument to be  
42 developed for collecting more specific data about naturopathic service utilization within and across countries.  
43 Nevertheless, current evidence reports a 12-month prevalence of naturopathy use ranging from 1% in the  
44 Region of the Americas to 6% in European and Western Pacific Regions, though there are significant differences  
45 between and within world regions. Differences in naturopathic utilization in these regions may be indicative of  
46 a range of policy, legislative and social factors impacting the naturopathic profession. Despite these ongoing  
47 factors, further research attention is warranted to support the integration of naturopathic services into  
48 healthcare systems to ensure consumers have access to safe and effective multi-disciplinary care.

## 54 55 56 57 58 59 60 References

1. Snider, P. and J. Zeff, *Unifying Principles of Naturopathic Medicine Origins and Definitions*. Integrative Medicine: A Clinician's Journal, 2019. **18**(4): p. 36.
2. World Naturopathic Federation Roots Committee, *WNF - Naturopathic Roots Report*. 2016, World Naturopathic Federation,: Toronto, Canada.
3. Dunn, J., et al., *Characteristics of global naturopathic education, regulation, and practice frameworks: results from an international survey*. BMC complementary medicine and therapies, 2021. **21**(1): p. 1-19.
4. Steel, A., et al., *Overview of international naturopathic practice and patient characteristics: results from a cross-sectional study in 14 countries*. BMC Complementary Medicine and Therapies, 2020. **20**(1): p. 59.
5. World Naturopathic Federation, *2016 Naturopathic Numbers Report*. 2016, World Naturopathic Federation: Canada.
6. World Naturopathic Federation, *Global Naturopathic Regulation*. 2018, World Naturopathic Federation: Toronto, Ontario.
7. Smith, M., A. Burton, and T. Falkenberg, *World Health Organization Traditional Medicine Strategy 2014–2023*. New strategy for traditional and complementary medicine includes the development and use of herbal medicinal preparations. HerbalEGram, 2014. **11**(5).
8. Leach, M.J., *Profile of the complementary and alternative medicine workforce across Australia, New Zealand, Canada, United States and United Kingdom*. Complementary therapies in medicine, 2013. **21**(4): p. 364-378.
9. Reid, R., et al., *Complementary medicine use by the Australian population: a critical mixed studies systematic review of utilisation, perceptions and factors associated with use*. BMC Complementary and Alternative Medicine, 2016. **16**(1): p. 176.
10. Leach, M.J., *Determinants of Complementary Medicine Service Utilization in a Regional South Australian Population: A Cross-Sectional Study*. The Journal of Rural Health, 2021. **37**(1): p. 69-80.
11. Bradley, R., et al., *Survey of CAM interest, self-care, and satisfaction with health care for type 2 diabetes at group health cooperative*. BMC complementary and alternative medicine, 2011. **11**(1): p. 121.
12. Foley, H. and A. Steel, *Patient perceptions of clinical care in complementary medicine: A systematic review of the consultation experience*. Patient Educ Couns, 2016. **100**: p. 212-23.
13. Foley, H., A. Steel, and J. Adams, *Perceptions of Person-Centred Care Amongst Individuals with Chronic Conditions who Consult Complementary Medicine Practitioners*. Complementary Therapies in Medicine, 2020: p. 102518.
14. Foley, H., A. Steel, and J. Adams, *Consultation with complementary medicine practitioners by individuals with chronic conditions: Characteristics and reasons for consultation in Australian clinical settings*. Health & social care in the community, 2020.
15. Legenne, M., et al., *Perception of naturopathy for female patients with metastatic gynecological cancer: A qualitative study*. Palliative & supportive care, 2015. **13**(6): p. 1663-1668.
16. Shea, B.J., et al., *AMSTAR 2: a critical appraisal tool for systematic reviews that include randomised or non-randomised studies of healthcare interventions, or both*. bmj, 2017. **358**.
17. Innovation, V.H., *Covidence systematic review software*. Melbourne, Australia.
18. Knottnerus, A. and P. Tugwell, *STROBE--a checklist to Strengthen the Reporting of Observational Studies in Epidemiology*. Journal of clinical epidemiology, 2008. **61**(4): p. 323.
19. Hsu, C., et al., *New perspectives on patient expectations of treatment outcomes: results from qualitative interviews with patients seeking complementary and alternative medicine treatments for chronic low back pain*. BMC Complementary Alternative Medicine, 2014. **14**(1): p. 276.
20. Organization, W.H., *WHO global report on traditional and complementary medicine 2019*, in *WHO global report on traditional and complementary medicine 2019*. 2019.
21. Srinivasan, R. and V.R. Sugumar, *Spread of traditional medicines in India: Results of national sample survey organization's perception survey on use of Ayush*. Journal of evidence-based complementary & alternative medicine, 2017. **22**(2): p. 194-204.
22. Neyeloff, J.L., S.C. Fuchs, and L.B. Moreira, *Meta-analyses and Forest plots using a microsoft excel spreadsheet: step-by-step guide focusing on descriptive data analysis*. BMC research notes, 2012. **5**(1): p. 1-6.
23. Higgins, J.P., et al., *Measuring inconsistency in meta-analyses*. Bmj, 2003. **327**(7414): p. 557-560.
24. Higgins, J.P., et al., *Cochrane handbook for systematic reviews of interventions*. 2019: John Wiley & Sons.
25. Hunt, K.J., et al., *Complementary and alternative medicine use in England: Results from a national survey*. International Journal of Clinical Practice, 2010. **64**(11): p. 1496-1502.



- 1
  - 2
  - 3
  - 4
  - 5
  - 6
  - 7
  - 8
  - 9
  - 10
  - 11
  - 12
  - 13
  - 14
  - 15
  - 16
  - 17
  - 18
  - 19
  - 20
  - 21
  - 22
  - 23
  - 24
  - 25
  - 26
  - 27
  - 28
  - 29
  - 30
  - 31
  - 32
  - 33
  - 34
  - 35
  - 36
  - 37
  - 38
  - 39
  - 40
  - 41
  - 42
  - 43
  - 44
  - 45
  - 46
  - 47
  - 48
  - 49
  - 50
  - 51
  - 52
  - 53
  - 54
  - 55
  - 56
  - 57
  - 58
  - 59
  - 60
26. Klein, S.D., et al., *Usage of complementary medicine in Switzerland: Results of the Swiss health survey 2012 and development since 2007*. PLoS ONE, 2015. **10**(10): p. no pagination.
27. Shmueli, A., I. Igudin, and J. Shuval, *Change and stability: use of complementary and alternative medicine in Israel: 1993, 2000 and 2007*. European Journal of Public Health, 2011. **21**(2): p. 254-259.
28. Su, D. and L. Li, *Trends in the use of complementary and alternative medicine in the United States: 2002-2007*. Journal of Health Care for the Poor and Underserved, 2011. **22**(1): p. 296-310.
29. Clarke, T.C., et al., *Trends in the use of complementary health approaches among adults: United States, 2002-2012*. National health statistics reports, 2015(79): p. 1-16.
30. Esmail, N., *Complementary and Alternative Medicine*. 2017: Fraser Institute.
31. McIntyre, E., et al., *Consultations with Naturopaths and Western Herbalists: Prevalence of Use and Characteristics of Users in Australia*. The Journal of Alternative Complementary Medicine, 2019. **25**(2).
32. Lafferty, W.E., et al., *The use of complementary and alternative medical providers by insured cancer patients in Washington State*. Cancer, 2004. **100**(7): p. 1522-30.
33. Fleming, S.A. and N.C. Gutknecht, *Naturopathy and the primary care practice*. Primary Care: Clinics in Office Practice, 2010. **37**(1): p. 119-136.
34. Albert, D.P. and F.B. Butar, *Distribution, concentration, and health care implications of naturopathic physicians in the United States*. Complementary health practice review, 2004. **9**(2): p. 103-117.
35. Whedon, J., et al., *Insurance reimbursement for complementary healthcare services*. The Journal of Alternative and Complementary Medicine, 2017. **23**(4): p. 264-267.
36. Litchy, A.P., *Naturopathic physicians: holistic primary care and integrative medicine specialists*. Journal of dietary supplements, 2011. **8**(4): p. 369-377.
37. Heudorf, U., A. Carstens, and M. Exner, *Naturopathic practitioners and the public health system. Legal principles as well as experience from naturopathic practitioner candidate tests and hygiene inspections of naturopathic practitioner's practices in the Rhine-Main area in 2004-2007*. Bundesgesundheitsblatt, Gesundheitsforschung, Gesundheitsschutz, 2010. **53**(2): p. 245-257.
38. National Center for Complementary and Integrative Health. *Are You Considering a Complementary Health Approach?* 2016 [cited 2021 30 June]; Available from: <https://www.nccih.nih.gov/health/are-you-considering-a-complementary-health-approach>.
39. von Ammon, K., et al., *Complementary and alternative medicine provision in Europe—first results approaching reality in an unclear field of practices*. Complementary Medicine Research, 2012. **19**(Suppl. 2): p. 37-43.
40. World Naturopathic Federation, *World Naturopathic Federation Report*. 2015, World Naturopathic Federation: Ontario, Canada.
41. Ooi, S.L., L. McLean, and S.C. Pak, *Naturopathy in Australia: Where are we now? Where are we heading?* Complementary therapies in clinical practice, 2018. **33**: p. 27-35.
42. Myers, S. and V. Vigar, *The State of the Evidence for Whole-System Multi-Modality Naturopathic Medicine: A Systematic Scoping Review*. The Journal of Alternative & Complementary Medicine, 2019. **25**(2).
43. Steel, A., et al., *Generational differences in complementary medicine use in young Australian women: Repeated cross-sectional dataset analysis from the Australian longitudinal study on women's health*. Complementary therapies in medicine, 2019. **43**: p. 66-72.

## AUTHOR CONTRIBUTIONS

AS devised the project, the main conceptual idea and drafted the review protocol. All authors reviewed and edited the protocol prior to registration. Literature searching, removal of duplicates and filtering of citations by title and abstract was undertaken by AM. Full text retrieval and assessment of articles against eligibility criteria was undertaken by AM and AS. Data extraction was completed by JHar. STROBE assessment was completed by CVV, JS and AS. Risk of bias assessment was completed by JG, JHaw and AS. Meta-analysis was completed by JG, KC and HC. The method section of the manuscript was drafted by HC, AS, JS and JHaw. The results were drafted by AS and HC. The discussion was drafted by JHar, JW, JA and BL. The introduction was drafted by RR, ML, and RB. All authors reviewed and edited the full draft of the manuscript prior to submission.

## COMPETING INTERESTS

The authors have no competing interests to declare.

## FUNDING

This research received no specific grant from any funding agency in the public, commercial or not-for-profit sectors.



Table 1. Philosophical principles of naturopathy [3]

- First do no harm
- Healing power of nature
- Treat the cause
- Treat the whole person
- Disease prevention and health promotion
- Naturopathic practitioner as teacher

Table 2: Example search terms applied to database searches

1. EXP COMPLEMENTARY THERAPIES/
2. ((ALTERNATIVE OR COMPLEMENTARY OR INTEGRATIVE) ADJ (MEDICINE OR THERAPY OR THERAPIES)).TW,KW.
3. NATUROPATHY/
4. NATUROPAT\$.AF.
5. HEILPRAKTIKER.AF.
6. 1 OR 2 OR 3 OR 4 OR 5
7. COHORT STUDIES/ OR LONGITUDINAL STUDIES/ OR FOLLOW-UP STUDIES/ OR PROSPECTIVE STUDIES/ OR RETROSPECTIVE STUDIES/ OR COHORT.TI,AB. OR LONGITUDINAL.TI,AB. OR PROSPECTIVE.TI,AB. OR RETROSPECTIVE.TI,AB.
8. CROSS-SECTIONAL STUDIES/ OR PREVALENCE/ OR (CROSS-SECTIONAL OR PREVALENCE OR TRANSVERSAL).TI,AB,KW.
9. (OBSERVATIONAL ADJ (STUDY OR STUDIES)).TW.
10. SURVEY\$.TW.
11. 7 OR 8 OR 9 OR 10
12. 6 AND 11

1  
2  
3 Figure 1: Flow chart representing article selection method in line with PRISMA protocol  
4  
5  
6

7 ATTACHED  
8  
9  
10  
11  
12  
13  
14  
15  
16  
17  
18  
19  
20  
21  
22  
23  
24  
25  
26  
27  
28  
29  
30  
31  
32  
33  
34  
35  
36  
37  
38  
39  
40  
41  
42  
43  
44  
45  
46  
47  
48  
49  
50  
51  
52  
53  
54  
55  
56  
57  
58  
59  
60

For peer review only

TABLE 3: SUMMARY INFORMATION OF INCLUDED STUDIES REPORTING PREVALENCE OF USE OF NATUROPATHY IN THE PREVIOUS 12 MONTHS

| WHO Region             | Country (WHO Region) | Author                 | Economic status                                                                                               | Design (measure)                                  | Year data collected | Population         | Naturopathy descriptor                  | Setting (e.g. urban, rural)                                             | N                                      | Duration of exposure | Overall use (%)                                          |
|------------------------|----------------------|------------------------|---------------------------------------------------------------------------------------------------------------|---------------------------------------------------|---------------------|--------------------|-----------------------------------------|-------------------------------------------------------------------------|----------------------------------------|----------------------|----------------------------------------------------------|
| European               | England              | Hunt et al (2010)      | Nationally representative                                                                                     | National Cohort (survey)                          | 2005                | General population | Naturopathy                             | Both                                                                    | 7630                                   | Previous 12 months   | 2%*                                                      |
|                        | Switzerland          | Klein et al. (2015)    | Nationally representative                                                                                     | National Cohort (survey)                          | 2007, 2012          | General population | Naturopathy                             | Both                                                                    | 2007: 14,432<br>2012: 18,357           | Previous 12 months   | 2007: n=1185; 7.7%<br>2012: n=1597; 7.7%                 |
| Eastern Mediterranean  | Israel               | Shmueli, et al (2010)  | Subjective economic status 'very good' or 'good' range from M=0,49 to M=0.58                                  | cross-sectional (survey)                          | 1993, 2000, 2007    | General population | Naturopathy                             | Urban                                                                   | 1993: 2003<br>2000: 2505<br>2007: 752  | Previous 12 months   | 1993: n=400; 20%<br>2000: n=425; 17%<br>2007: n=135; 18% |
| Region of the Americas | Canada               | Esmail (2017)          | Evenly distributed (<\$20 000 - >\$79 999)                                                                    | Cross-sectional (structured telephone interviews) | 1997, 2006, 2016    | General population | Naturopathy                             | National                                                                | 1997: 1500<br>2006: 2000<br>2016: 2000 | Previous 12 months   | 1997: n=45; 3%<br>2006: n=80; 4%<br>2016: N=100; 5%      |
|                        | USA                  | Su and Li (2011)       | Nationally representative                                                                                     | cross-sectional survey (survey)                   | 2002, 2007          | General population | Naturopathy                             | National                                                                | 2002: 30267<br>2007: 20769             | Previous 12 months   | 2002: n=76; 0.25%<br>2007: n=71; 0.34%                   |
|                        |                      | Clarke et al (2015)    | Nationally representative                                                                                     | Cross-sectional (survey)                          | 2012                | General population | Naturopathy                             | National                                                                | 38280                                  | Previous 12 months   | n=153; 0.4%                                              |
| Western Pacific        | Australia            | McIntyre et al. (2019) | Manageability on household income; impossible, difficult all/some of time (58.6%), not too bad / easy (41.4%) | National Cross-sectional (survey)                 | 2017                | General population | Naturopathy and western herbal medicine | Both<br>Urban: 72.6%<br>Inner regional: 18.7%<br>Outer reg/remote: 8.7% | 2019                                   | Previous 12 months   | n=126; 6.2%                                              |

\* Estimated figure based on interpretation of the chart included in the article.

TABLE 4: SUMMARY INFORMATION OF INCLUDED STUDIES REPORTING PREVALENCE OF USE OF NATUROPATHY OVER OTHER TIME PERIODS

| WHO Region             | Country (WHO Region) | Author                             | Economic status                                                | Design (measure)         | Year data collected | Population                           | Naturopathy descriptor | Setting (e.g. urban, rural) | N                                                     | Duration of exposure | Overall use (%)                                                           |
|------------------------|----------------------|------------------------------------|----------------------------------------------------------------|--------------------------|---------------------|--------------------------------------|------------------------|-----------------------------|-------------------------------------------------------|----------------------|---------------------------------------------------------------------------|
| Region of the Americas | Canada               | Esmail (2017)                      | Evenly distributed (<\$20 000 - >\$79 999)                     | Cross-sectional survey   | 1997, 2006, 2016    | General population                   | Naturopathy            | Both                        | 1500 (1997);<br>2000 (2006);<br>2000 (2016)           | Ever used            | 1997: 6%<br>2006: 9%<br>2016: 11%                                         |
| South-East Asian       | India                | Srinivasan and Raji Sugumar (2017) | Diversity of occupation, social group, education, and religion | Cross-sectional (survey) | 2011-2012           | Households in the general population | Naturopathy and yoga   | Both                        | Total:<br>65507<br>Urban:<br>26996<br>Rural:<br>38511 | Not specified        | Total:<br>n=6616 (10%)<br>Urban:<br>n=3227 (12%)<br>Rural:<br>n=2607 (7%) |

TABLE 5: ASSESSMENT OF RISK OF BIAS AND REPORTING QUALITY FOR INCLUDED STUDIES

| Criteria                                             | Manuscript        |                    |                      |               |                  |                     |                       |                                    |
|------------------------------------------------------|-------------------|--------------------|----------------------|---------------|------------------|---------------------|-----------------------|------------------------------------|
|                                                      | Hunt et al (2010) | Klein et al (2015) | Shmueli et al (2010) | Esmail (2017) | Su and Li (2011) | Clarke et al (2015) | McIntyre et al (2019) | Srinivasan and Raji Sugumar (2017) |
| <b>Risk of Bias</b>                                  |                   |                    |                      |               |                  |                     |                       |                                    |
| 1 – representativeness of target population          | Y                 | Y                  | Y                    | Y             | Y                | Y                   | Y                     | Y                                  |
| 2 – representativeness of sample population          | Y                 | Y                  | Y                    | Y             | Y                | Y                   | Y                     | Y                                  |
| 3 – random selection or census                       | Y                 | Y                  | Y                    | Y             | Y                | Y                   | N                     | Y                                  |
| 4 – non-response bias minimal                        | Y                 | Y                  | N                    | Y             | Y                | Y                   | N                     | Y                                  |
| 5 – data direct from participants                    | Y                 | Y                  | Y                    | Y             | Y                | Y                   | Y                     | Y                                  |
| 6 – acceptable case definition                       | Y                 | Y                  | Y                    | Y             | Y                | Y                   | Y                     | N                                  |
| 7 – reliability and validity of instrument           | N/A               | N/A                | N/A                  | N/A           | N/A              | N/A                 | N/A                   | N/A                                |
| 8 – same mode of data for all subjects               | Y                 | Y                  | Y                    | Y             | Y                | Y                   | Y                     | Y                                  |
| 9 – appropriate length of shortest prevalence period | Y                 | Y                  | Y                    | Y             | Y                | Y                   | Y                     | N                                  |
| 10 – numerator and denominator appropriate           | N                 | N                  | N                    | N             | N                | N                   | Y                     | Y                                  |
| 11 - Summary                                         | Low               | Low                | Low                  | Low           | Low              | Low                 | Low                   | Low                                |
| <b>Reporting Quality</b>                             |                   |                    |                      |               |                  |                     |                       |                                    |
| Title and abstract                                   |                   |                    |                      |               |                  |                     |                       |                                    |
| 1a – Title                                           | Y                 | Y                  | N                    | N             | N                | N                   | N                     | Y                                  |
| 1b - Abstract                                        | Y                 | Y                  | Y                    | Y             | N                | N                   | Y                     | N                                  |
| Introduction                                         |                   |                    |                      |               |                  |                     |                       |                                    |
| 2 - Background/rationale                             | Y                 | Y                  | Y                    | Y             | Y                | Y                   | Y                     | Y                                  |
| 3 - Objectives                                       | Y                 | Y                  | Y                    | Y             | Y                | Y                   | Y                     | Y                                  |
| Methods                                              |                   |                    |                      |               |                  |                     |                       |                                    |
| 4 - Study design                                     | Y                 | Y                  | Y                    | Y             | Y                | Y                   | Y                     | Y                                  |
| 5 - Setting                                          | Y                 | Y                  | Y                    | Y             | Y                | Y                   | Y                     | Y                                  |
| 6 - Participants                                     | Y                 | Y                  | Y                    | Y             | Y                | Y                   | Y                     | Y                                  |
| 7 - Variables                                        | Y                 | Y                  | Y                    | N             | N                | Y                   | Y                     | N                                  |
| 8 - Data sources/measurement                         | Y                 | Y                  | Y                    | N             | Y                | Y                   | Y                     | Y                                  |
| 9 - Bias                                             | Y                 | Y                  | Y                    | Y             | Y                | Y                   | Y                     | N                                  |
| 10 - Study size                                      | Y                 | Y                  | Y                    | Y             | N                | N                   | Y                     | Y                                  |
| 11 - Quantitative variables                          | Y                 | Y                  | Y                    | N             | N                | Y                   | Y                     | N                                  |
| 12a – All statistical methods                        | Y                 | Y                  | N                    | N             | Y                | Y                   | Y                     | N                                  |
| 12b – Subgroups and interactions                     | N/A               | N/A                | N/A                  | Y             | Y                | Y                   | Y                     | Y                                  |
| 12c – Missing data                                   | N                 | Y                  | N                    | N             | N                | N                   | N                     | N                                  |

|                   |                                                           |     |     |     |     |     |     |     |     |
|-------------------|-----------------------------------------------------------|-----|-----|-----|-----|-----|-----|-----|-----|
|                   | <i>12d – Analysis accounting for sampling</i>             | N/A | N/A | Y   | N   | Y   | Y   | Y   | N   |
|                   | <i>12e – Any sensitivity analysis</i>                     | N/A |
| Results           |                                                           |     |     |     |     |     |     |     |     |
|                   | <i>13a – Numbers of participants</i>                      | Y   | Y   | Y   | Y   | N   | N   | Y   | N   |
|                   | <i>13b – Reasons for nonparticipation</i>                 | N   | N   | N   | N   | N   | N   | N   | N   |
|                   | <i>13c – flow diagram</i>                                 | N   | N   | N   | N   | N   | N   | N   | N   |
|                   | <i>14a – Characteristics of study participants</i>        | Y   | Y   | N   | Y   | N   | Y   | Y   | Y   |
|                   | <i>14b – Participants with missing data</i>               | N   | N   | N   | N   | N   | N   | N   | N   |
|                   | <i>15 - Outcome data</i>                                  | N   | Y   | Y   | Y   | Y   | Y   | Y   | Y   |
|                   | <i>16a – Unadjusted and applicable adjusted estimates</i> | Y   | Y   | Y   | Y   | Y   | Y   | Y   | Y   |
|                   | <i>16b – Report category boundaries</i>                   | ?   | Y   | N/A | N   | N/A | N/A | Y   | N/A |
|                   | <i>16c –Estimates of absolute risk</i>                    | N/A |
|                   | <i>17 - Other analyses</i>                                | N/A | N/A | N/A | Y   | Y   | Y   | Y   | Y   |
| Discussion        |                                                           |     |     |     |     |     |     |     |     |
|                   | <i>18 - Key results</i>                                   | Y   | Y   | Y   | Y   | Y   | Y   | Y   | N   |
|                   | <i>19 - Limitations</i>                                   | Y   | Y   | Y   | N   | N   | N   | Y   | N   |
|                   | <i>20 - Interpretation</i>                                | Y   | Y   | Y   | N   | Y   | Y   | Y   | N   |
|                   | <i>21 - Generalisability</i>                              | Y   | Y   | Y   | Y   | Y   | Y   | Y   | N   |
| Other information |                                                           |     |     |     |     |     |     |     |     |
|                   | <i>22 - Funding</i>                                       | Y   | Y   | Y   | Y   | N   | N   | Y   | Y   |

1  
2  
3  
4  
5  
6  
7  
8  
9  
10  
11  
12  
13  
14  
15  
16  
17  
18  
19  
20  
21  
22  
23  
24  
25  
26  
27  
28  
29  
30  
31  
32  
33  
34  
35  
36  
37  
38  
39  
40  
41  
42  
43  
44  
45  
46  
47  
48  
49  
50  
51  
52  
53  
54  
55  
56  
57  
58  
59  
60

Figure 2: 12-month prevalence of naturopathy use in different countries.

For peer review only

1  
2  
3 Figure 3: 12-month prevalence of naturopathy use in different WHO world regions.  
4  
5  
6  
7  
8  
9  
10  
11  
12  
13  
14  
15  
16  
17  
18  
19  
20  
21  
22  
23  
24  
25  
26  
27  
28  
29  
30  
31  
32  
33  
34  
35  
36  
37  
38  
39  
40  
41  
42  
43  
44  
45  
46  
47  
48  
49  
50  
51  
52  
53  
54  
55  
56  
57  
58  
59  
60

For peer review only



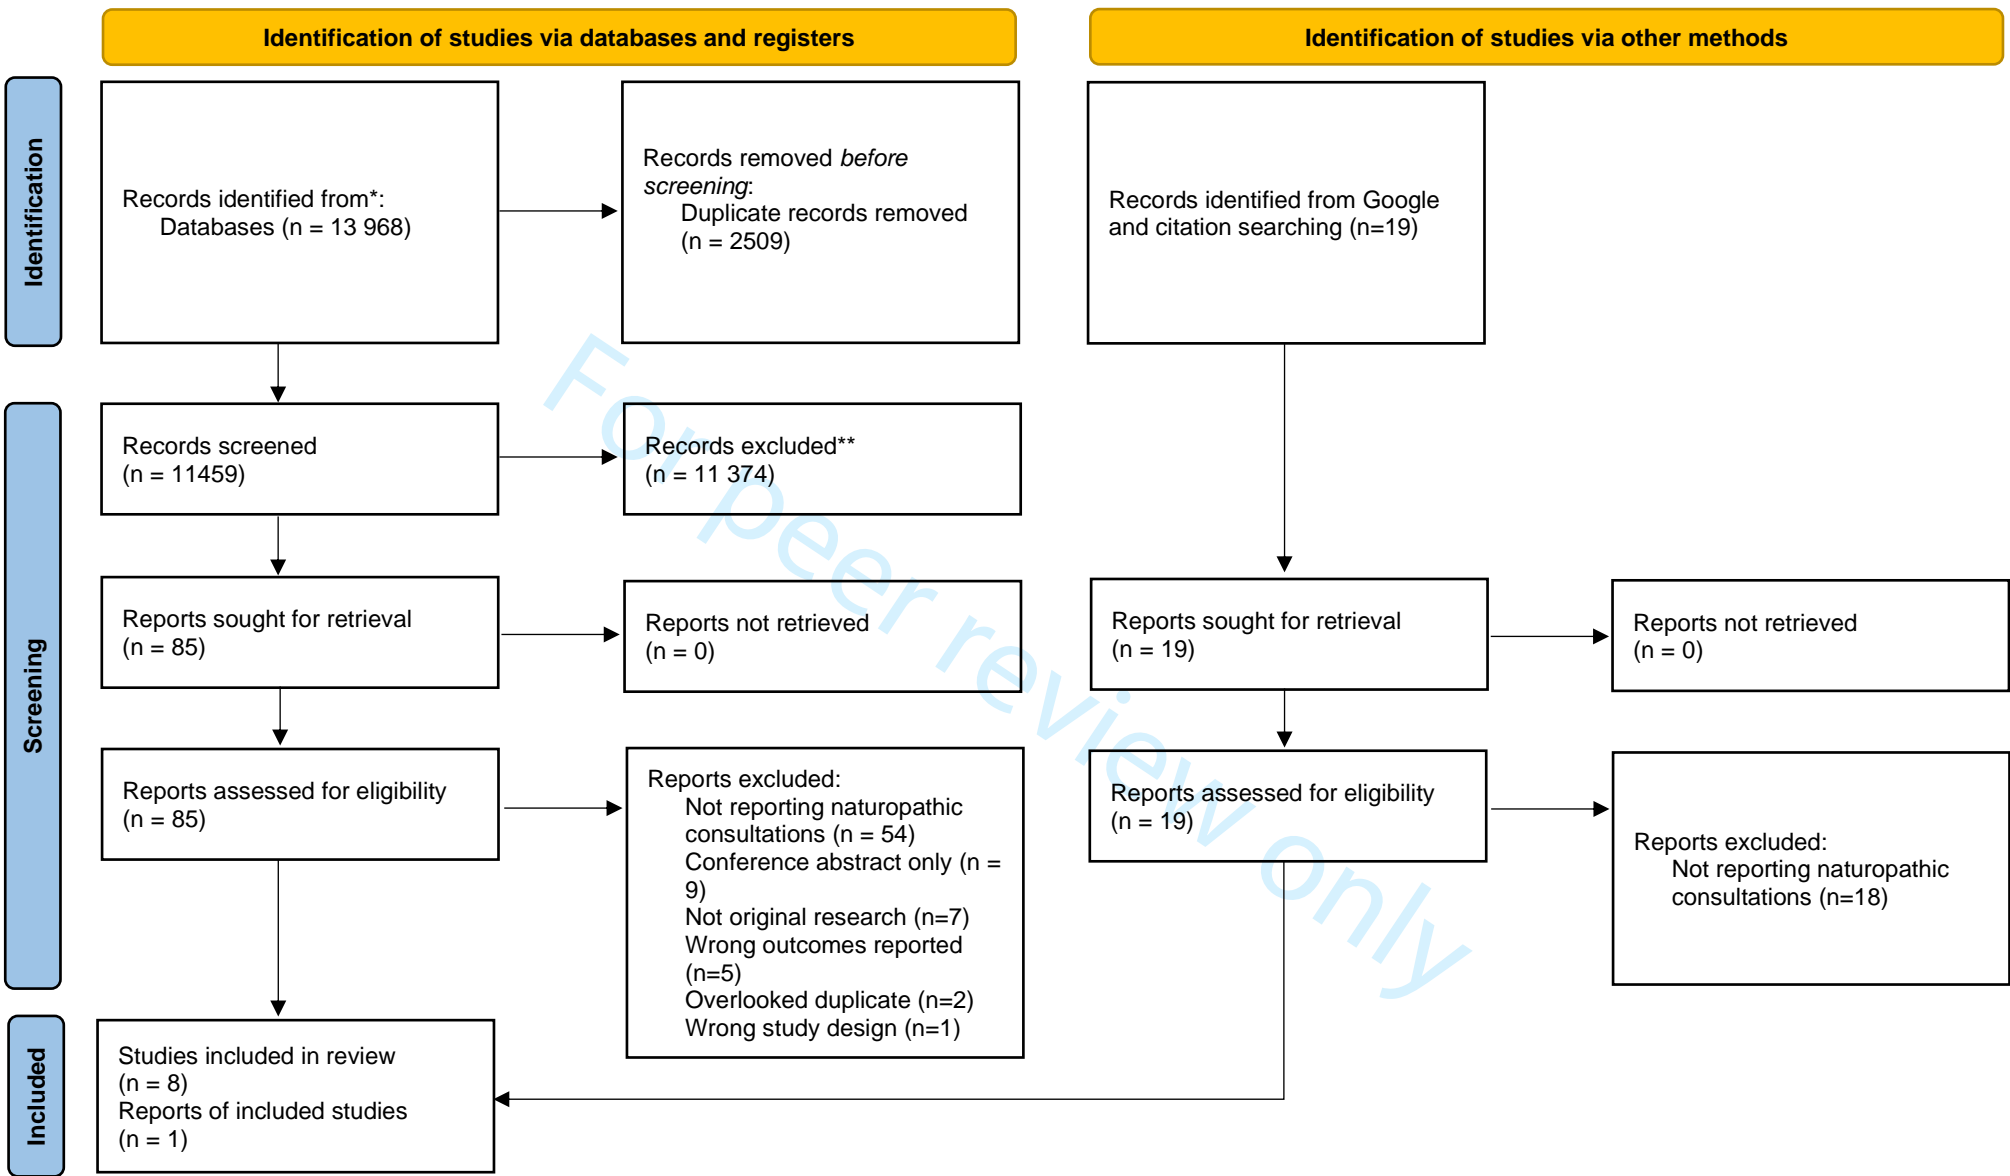

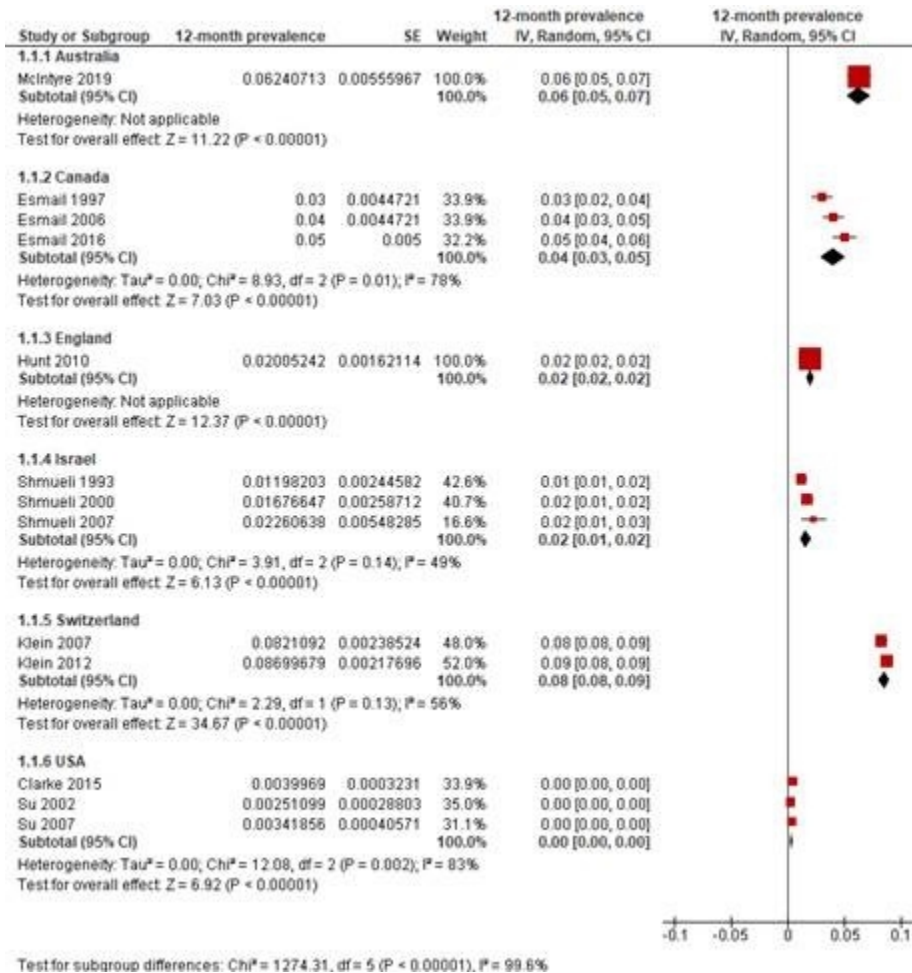

Figure 2: 12-month prevalence of naturopathy use in different countries.

121x127mm (96 x 96 DPI)

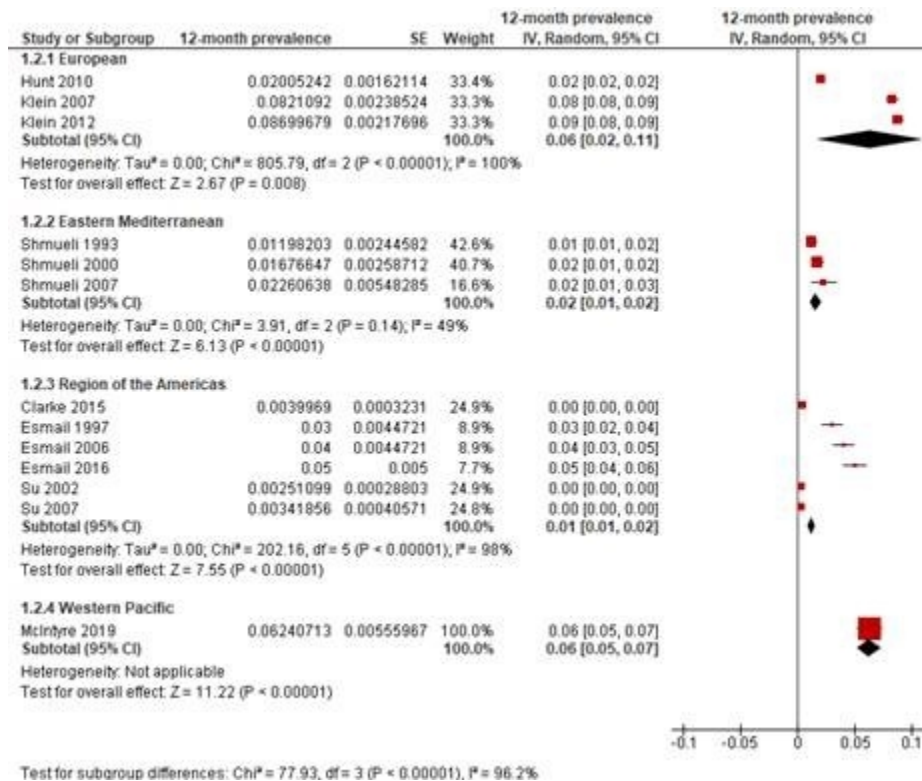

Figure 3: 12-month prevalence of naturopathy use in different WHO world regions.

123x102mm (96 x 96 DPI)

## Supplementary File 1: List of Excluded articles and reasons for exclusion

| Title                                                                                                                                                               | Authors                                                                            | Published Year | Journal                                                | Volume | Issue | Pages     | Notes                                                         | Tags |
|---------------------------------------------------------------------------------------------------------------------------------------------------------------------|------------------------------------------------------------------------------------|----------------|--------------------------------------------------------|--------|-------|-----------|---------------------------------------------------------------|------|
| <b>Trends in the use of complementary health approaches among adults: United States, 2002-2012</b>                                                                  | Clarke, T. C.; Black, L. I.; Stussman, B. J.; Barnes, P. M.; Nahin, R. L.          | 2015           | National health statistics reports                     |        |       | 79 Jan-16 | Exclusion reason: Does not report naturopathic consultations  |      |
| <b>The prevalence and experience of Australian naturopaths and Western herbalists working within community pharmacies</b>                                           |                                                                                    | 2011           | Journal of the Australian Traditional-Medicine Society | 17     | 4     | 240-240   | Exclusion reason: Duplicate                                   |      |
| <b>Why seek complementary medicine? An observational study in homeopathic, acupunctural, naturopathic and mainstream medical practice</b>                           | Van Dulmen, S.; De Groot, J.; Koster, D.; Heiligers, P. J. M.                      | 2010           | Journal of Complementary and Integrative Medicine      | 7      | 1     | 20        | Exclusion reason: Does not report naturopathic consultations; |      |
| <b>The Australian Complementary Medicine Workforce: A Profile of 1,306 Practitioners from the PRACI Study</b>                                                       | Steel, A.; Leach, M.; Wardle, J.; Sibbritt, D.; Schloss, J.; D. Iezel H; Adams, J. | 2018           | Journal of Alternative and Complementary Medicine      | 24     | 4     | 385-394   | Exclusion reason: Does not report naturopathic consultations; |      |
| <b>Primary Care in Oregon: The Naturopathic Physician's Perspective</b>                                                                                             | Linn, Brooke L.; Metcalf, Gary                                                     | 2018           |                                                        |        |       | 10979746  | 231 Exclusion reason: Not original research;                  |      |
| <b>Characteristics of the Australian complementary and alternative medicine (CAM) workforce</b>                                                                     | Leach, Matthew J.; McIntyre, Erica; Frawley, Jane                                  | 2014           | Australian Journal of Herbal Medicine                  | 26     | 2     | 58-65     | Exclusion reason: Does not report naturopathic consultations; |      |
| <b>[Which complementary and alternative medicine modalities are integrated within Israeli healthcare organizations and do they match the public's preferences?]</b> | Keshet, Y.; Ben-Arye, E.                                                           | 2011           | Harefuah                                               | 15     | 8     | 635-689   | Exclusion reason: Does not report naturopathic consultations; |      |
| <b>Complementary medical health services: a cross sectional descriptive analysis of a Canadian naturopathic teaching clinic</b>                                     | Kennedy, Deborah A.; Bernhardt, Bob; Snyder, Tara; Bancu, Viviana; Cooley, Kieran  | 2015           | BMC Complementary & Alternative Medicine               | 15     | 1     | 1-Oct     | Exclusion reason: Wrong outcomes;                             |      |
| <b>Characteristics and job satisfaction of general practitioners using complementary and alternative medicine in Germany--is there a pattern?</b>                   | Joos, Stefanie; Musselmann, Berthold; Szecsenyi, Joachim; Goetz, Katja             | 2011           | BMC Complementary and Alternative Medicine             | 11     |       | 131       | Exclusion reason: Wrong outcomes;                             |      |
| <b>Naturopathic practice at North American academic institutions: Description of 300,483 visits and comparison to conventional primary care</b>                     | Chamberlin, S. R.; Oberg, E.; Hanes, D. A.; Calabrese, C.                          | 2014           | Integrative Medicine Insights                          |        | 9     | Jul-15    | Exclusion reason: Wrong outcomes;                             |      |
| <b>Complementary and alternative medicine among Filipinos: Prevalence, costs and patterns of use</b>                                                                | Morfe, J. H. D.; Lim, V. S.                                                        | 2013           | Phillippine Journal of Internal Medicine               | 51     | 4     |           | Exclusion reason: Wrong study design;                         |      |

1  
2  
3  
4  
5  
6  
7  
8  
9  
10  
11  
12  
13  
14  
15  
16  
17  
18  
19  
20  
21  
22  
23  
24  
25  
26  
27  
28  
29  
30  
31  
32  
33  
34  
35  
36  
37  
38  
39  
40  
41  
42  
43  
44  
45  
46

|                                                                                                                               |                                                                                               |      |                                                        |    |    |                        |                                                               |
|-------------------------------------------------------------------------------------------------------------------------------|-----------------------------------------------------------------------------------------------|------|--------------------------------------------------------|----|----|------------------------|---------------------------------------------------------------|
| <b>The prevalence and experience of Australian naturopaths and Western herbalists working within community pharmacies</b>     | Braun, L. A.; Spitzer, O.; Tiralongo, E.; Wilkinson, J. M.; Bailey, M.; Poole, S.; Dooley, M. | 2011 | BMC Complementary and Alternative Medicine             | 11 | 41 | (23 May 2011)          | Exclusion reason: Wrong outcomes;                             |
| <b>Integration of complementary and alternative medicine into family practices in Germany: Results of a national survey</b>   | Joos, S.; Musselmann, B.; Szecsenyi, J.                                                       | 2011 | Evidence-based Complementary and Alternative Medicine  | 20 | 11 | 495-813                | Exclusion reason: Wrong outcomes;                             |
| <b>USE OF COMPLEMENTARY AND ALTERNATIVE MEDICINE IN GEORGIA</b>                                                               | Nadareishvili, I.; Lunze, K.; Tabagari, N.; Beraia, A.; Pkhakadze, G.                         | 2017 | Georgian Medical News                                  |    |    | 272-157-164            | Exclusion reason: Does not report naturopathic consultations; |
| <b>Complementary and alternative health care in Israel</b>                                                                    | Shuval, J. T.; Averbuch, E.                                                                   | 2012 | Israel Journal of Health Policy Research               | 1  | 1  | 7                      | Exclusion reason: Does not report naturopathic consultations; |
| <b>WHO global report on traditional and complementary medicine 2019</b>                                                       | World Health Organisation                                                                     | 2019 |                                                        |    |    |                        | Exclusion reason: Does not report naturopathic consultations; |
| <b>TRADITIONAL AND COMPLEMENTARY MEDICINE IN PRIMARY HEALTH CARE</b>                                                          | World Health Organisation                                                                     | 2018 |                                                        |    |    | WHO/HIS/SDS/2018.37    | Exclusion reason: Does not report naturopathic consultations; |
| <b>The Philippines Health System Review</b>                                                                                   | World Health Organisation                                                                     | 2018 | Health Systems in Transition                           | 8  | 2  | 352                    | Exclusion reason: Does not report naturopathic consultations; |
| <b>SURGICAL WORKFORCE IN INDIA</b>                                                                                            | World Health Organisation                                                                     | 2015 |                                                        |    |    |                        | Exclusion reason: Does not report naturopathic consultations; |
| <b>The prevalence and experience of Australian naturopaths and Western herbalists working within community pharmacies. B</b>  |                                                                                               | 2011 | Journal of the Australian Traditional-Medicine Society | 17 | 3  | 167-168                | Exclusion reason: Duplicate;                                  |
| <b>Use of traditional medicine and complementary and alternative medicine in Taiwan: a multilevel analysis</b>                | Yeh, Mei-Ling; Lin, Kuan-Chia; Chen, Hsing-Hsia; Wang, Yu-Jen; Huang, Yu-Chiao                | 2015 | Holistic Nursing Practice                              | 29 | 2  | 87-95                  | Exclusion reason: Does not report naturopathic consultations; |
| <b>Benchmarks for training in traditional /complementary and alternative medicine: benchmarks for training in naturopathy</b> | World Health Organisation                                                                     | 2010 |                                                        |    |    |                        | Exclusion reason: Not original research;                      |
| <b>Malaysia health system review</b>                                                                                          | World Health Organisation                                                                     | 2012 | Health Systems in Transition                           | 2  |    | ISBN 978 92 9061 584 2 | Exclusion reason: Not original research;                      |

|                                                                                                                                                                                             |                                                                                                      |      |                                                 |    |                        |          |                                                                      |
|---------------------------------------------------------------------------------------------------------------------------------------------------------------------------------------------|------------------------------------------------------------------------------------------------------|------|-------------------------------------------------|----|------------------------|----------|----------------------------------------------------------------------|
| <b>New Zealand health system review</b>                                                                                                                                                     | World Health Organisation                                                                            | 2014 | Health Systems in Transition                    | 4  |                        | 272      | Exclusion reason: Not original research;                             |
| <b>The Regional Strategy for Traditional Medicine in the Western Pacific (2011-2020)</b>                                                                                                    | World Health Organisation                                                                            | 2012 |                                                 |    | ISBN 978 92 9061 559 0 | 71       | Exclusion reason: Not original research;                             |
| <b>WHO traditional medicine strategy: 2014-2023.</b>                                                                                                                                        | World Health Organisation                                                                            | 2013 |                                                 |    |                        | 78       | Exclusion reason: Not original research;                             |
| <b>Two-Thirds of Survey Respondents in Southern Sweden Used Complementary or Alternative Medicine in 2015</b>                                                                               | Wemrell, M.; Merlo, J.; Mulinari, S.; Hornborg, A. C.                                                | 2017 | Complementary medicine research                 | 24 | 5                      | 302-309  | Exclusion reason: Does not report naturopathic consultations;        |
| <b>Determinants for the Use of Complementary and Alternative Medicine: Results from a National Study</b>                                                                                    | Watts, Kristen Allen; Turner, Lori W.                                                                | 2018 |                                                 |    |                        | 10934635 | 307<br>Exclusion reason: Does not report naturopathic consultations; |
| <b>Distribution of complementary and alternative medicine (CAM) providers in rural New South Wales, Australia: a step towards explaining high CAM use in rural health?</b>                  | Wardle, Jon; Adams, Jon; Magalhaes, Ricardo J. Soares; Sibbritt, David                               | 2011 | The Australian journal of rural health          | 19 | 4                      | 197-204  | Exclusion reason: Does not report naturopathic consultations;        |
| <b>The interface with naturopathy in rural primary health care: A survey of referral practices of general practitioners in rural and regional New South Wales, Australia</b>                | Wardle, J. L.; Sibbritt, D. W.; Adams, J.                                                            | 2014 | BMC Complementary and Alternative Medicine      | 14 |                        | 238      | Exclusion reason: Does not report naturopathic consultations;        |
| <b>Mapping the natural health landscape: New Zealand-based CAM professionals survey</b>                                                                                                     | Vempati, R.; Dunn, J.; Cottingham, P.; Sibbritt, D.; Adams, J.                                       | 2012 | BMC Complementary and Alternative Medicine      | 12 | SUPPL. 1               |          | Exclusion reason: Conference abstract only;                          |
| <b>Use of Complementary and Alternative Medicine in Bayamon, Puerto Rico</b>                                                                                                                | Torres-Zeno, R. E.; Rios-Motta, R.; Rodriguez-Sanchez, Y.; Miranda-Massari, J. R.; Marin-Centeno, H. | 2016 | Puerto Rico Health Sciences Journal             | 35 | 2                      | 69-75    | Exclusion reason: Does not report naturopathic consultations;        |
| <b>Attitude of Conventional and CAM Physicians Toward CAM in India</b>                                                                                                                      | Telles, Shirley; Gaur, Vaishali; Sharma, Sachin; Balkrishna, Acharya                                 | 2011 | Journal of Alternative & Complementary Medicine | 17 | 11                     | 106-1073 | Exclusion reason: Does not report naturopathic consultations;        |
| <b>Wellness versus treatment? Complementary and integrative healthcare (CIH) in the 2007 national health interview survey (NHIS)</b>                                                        | Stussman, B.; Alekel, L.; Nahin, R.; Edwards, E.; Barnes, P.                                         | 2012 | BMC Complementary and Alternative Medicine      | 12 | SUPPL. 1               |          | Exclusion reason: Conference abstract only;                          |
| <b>Generational differences in complementary medicine use in young Australian women: Repeated cross-sectional dataset analysis from the Australian longitudinal study on women's health</b> | Steel, A.; Munk, N.; Wardle, J.; Adams, J.; Sibbritt, D.; Lauche, R.                                 | 2019 | Complementary Therapies in Medicine             | 43 |                        | 66-72    | Exclusion reason: Does not report naturopathic consultations;        |
| <b>Complementary and alternative medicine: attitudes, knowledge and use among surgeons and anaesthesiologists in Hungary</b>                                                                | Soos, Sandor Arpad; Jeszenoi, Norbert; Darvas, Katalin; Harsanyi, Laszlo                             | 2016 | BMC Complementary and Alternative Medicine      | 16 | 1                      | 443      | Exclusion reason: Does not report                                    |

1  
2  
3  
4  
5  
6  
7  
8  
9  
10  
11  
12  
13  
14  
15  
16  
17  
18  
19  
20  
21  
22  
23  
24  
25  
26  
27  
28  
29  
30  
31  
32  
33  
34  
35  
36  
37  
38  
39  
40  
41  
42  
43  
44  
45  
46

|                                                                                                                                                                                                                         |                                                                                                  |      |                                                               |    |          |         |     |       |                                                               |
|-------------------------------------------------------------------------------------------------------------------------------------------------------------------------------------------------------------------------|--------------------------------------------------------------------------------------------------|------|---------------------------------------------------------------|----|----------|---------|-----|-------|---------------------------------------------------------------|
|                                                                                                                                                                                                                         |                                                                                                  |      |                                                               |    |          |         |     |       | naturopathic consultations;                                   |
| <b>Complementary and alternative medicine: contemporary trends and issues</b>                                                                                                                                           | Smith, Joanna M.; John Sullivan, S.; David Baxter, G.                                            | 2011 | Physical Therapy Reviews                                      | 16 | 2        | 91-95   |     |       | Exclusion reason: Not original research;                      |
| <b>Use of complementary and alternative medicine in the population of Kedah Darul Aman, Malaysia</b>                                                                                                                    | Sivadasan, S.; Ali, A. N.; Lin, L. W.; Balakrishnan, D.; Ramachandran, S.; Dhanaraj, S. A.       | 2014 | International Journal of Pharmaceutical Sciences and Research | 5  | 4        | 126-127 | 3   |       | Exclusion reason: Does not report naturopathic consultations; |
| <b>Epidemiology of the use of complementary and alternative medicine in central area of Sao Paulo</b>                                                                                                                   | Simoes, O.; Castro, B.                                                                           | 2013 | European Journal of Epidemiology                              | 28 | 1 SUPPL. |         |     | S219  | Exclusion reason: Conference abstract only;                   |
| <b>[Complementary and alternative medicine services in Colombia]</b>                                                                                                                                                    | Rojas-Rojas, Alejandra                                                                           | 2012 | Servicios de medicina alternativa en Colombia.                | 14 | 3        | 470-7   |     |       | Exclusion reason: Does not report naturopathic consultations; |
| <b>Composition and distribution of the health workforce in India: estimates based on data from the National Sample Survey</b>                                                                                           | Rao, K. D.; Shahrawat, R.; Bhatnagar, A.                                                         | 2016 | WHO South-East Asia journal of public health                  | 5  | 2        | 133-140 |     |       | Exclusion reason: Does not report naturopathic consultations; |
| <b>Prevalence of Complementary and Alternative Medicine Use in the General Population in the Czech Republic</b>                                                                                                         | Pokladnikova, J.; Selke-Krulichova, I.                                                           | 2016 | Forschende Komplementarmediz in (2006)                        | 23 | 1        | 22-28   |     |       | Exclusion reason: Does not report naturopathic consultations; |
| <b>Regional variation in use of complementary health approaches by U.S. adults</b>                                                                                                                                      | Peregoy, J. A.; Clarke, T. C.; Jones, L. I.; Stussman, B. J.; Nahin, R. L.                       | 2014 | NCHS Data Brief                                               |    |          |         | 146 | 1-Aug | Exclusion reason: Does not report naturopathic consultations; |
| <b>Utilization of traditional and complementary medicine in Indonesia: Results of a national survey in 2014-15</b>                                                                                                      | Pengpid, S.; Peltzer, K.                                                                         | 2018 | Complementary Therapies in Clinical Practice                  | 33 |          | 156-163 |     |       | Exclusion reason: Does not report naturopathic consultations; |
| <b>Complementary and alternative medicine (CAM) utilization in Texas hospices</b>                                                                                                                                       | Olotu, B.; Brown, C. M.; Lawson, K.; Barner, J. C.                                               | 2012 | Value in Health                                               | 15 | 4        | A25     |     |       | Exclusion reason: Conference abstract only;                   |
| <b>Complementary and alternative medicine utilization in Texas hospices: Prevalence and challenges</b>                                                                                                                  | Olotu, B.; Brown, C.; Barner, J.; Lawson, K.                                                     | 2012 | Journal of the American Pharmacists Association               | 52 | 2        | 215-216 |     |       | Exclusion reason: Conference abstract only;                   |
| <b>Experiences and meanings of integration of TCAM (Traditional, Complementary and Alternative Medical) providers in three Indian states: results from a cross-sectional, qualitative implementation research study</b> | Nambiar, D.; Narayan, V. V.; Josyula, L. K.; Porter, J. D. H.; Sathyanarayana, T. N.; Sheikh, K. | 2014 | BMJ Open                                                      | 4  | 11       | e00520  | 3   |       | Exclusion reason: Does not report naturopathic consultations; |
| <b>Naturopaths in Ontario, Canada: Geographic patterns in intermediately-sized metropolitan areas and integration implications</b>                                                                                      | Meyer, S. P.                                                                                     | 2017 | Journal of Complementary and Integrative Medicine             | 14 | 1        | 92      |     |       | Exclusion reason: Does not report                             |



|    |                                                                                                                                                                                                      |                                                                                                             |      |                                                           |          |                            |                                                               |
|----|------------------------------------------------------------------------------------------------------------------------------------------------------------------------------------------------------|-------------------------------------------------------------------------------------------------------------|------|-----------------------------------------------------------|----------|----------------------------|---------------------------------------------------------------|
|    |                                                                                                                                                                                                      |                                                                                                             |      |                                                           |          |                            | naturopathic consultations;                                   |
| 5  | <b>An investigation into the use of complementary and alternative medicine in an urban general practice</b>                                                                                          | McKenna, F.; Killoury, F.                                                                                   | 2010 | Irish Medical Journal                                     | 10<br>3  | 7                          | Exclusion reason: Does not report naturopathic consultations; |
| 8  | <b>A survey to explore the views and practices of CAM practitioners in the UK</b>                                                                                                                    | Majumdar, A.; Williams, S.; Adams, N.                                                                       | 2012 | BMC Complementary and Alternative Medicine                | 12       | SUPPL.<br>1                | Exclusion reason: Conference abstract only;                   |
| 11 | <b>The prevalence of traditional and complementary medicine in the general population in Kashan, Iran, 2014</b>                                                                                      | Lotfi, M. S.; Adib-Hajbaghery, M.; Shahsavarloo, Z. R.; Gandomani, H. S.                                    | 2016 | European Journal of Integrative Medicine                  | 8        | 5<br>661-<br>669           | Exclusion reason: Does not report naturopathic consultations; |
| 14 | <b>Examining costs, utilization, and driving factors of complementary and alternative medicine (CAM) services</b>                                                                                    | Lewing, B.; Sangsiry, S. S.                                                                                 | 2018 | Value in Health                                           | 21       | Supplement 1<br>S97        | Exclusion reason: Conference abstract only;                   |
| 17 | <b>Profiling the Australian Consumer of Complementary and Alternative Medicine: A Secondary Analysis of National Health Survey Data</b>                                                              | Leach, M. J.                                                                                                | 2016 | Alternative therapies in health and medicine              | 22       | 4<br>64-<br>72             | Exclusion reason: Does not report naturopathic consultations; |
| 20 | <b>Complementary and alternative medicine (CAM) as part of primary health care in Germany-comparison of patients consulting general practitioners and CAM practitioners: A cross-sectional study</b> | Krug, K.; Kraus, K. I.; Herrmann, K.; Joos, S.                                                              | 2016 | BMC Complementary and Alternative Medicine                | 16       | 1<br>409                   | Exclusion reason: Does not report naturopathic consultations; |
| 23 | <b>Understanding CAM use in Lebanon: Findings from a national survey</b>                                                                                                                             | Kharroubi, S.; Chehab, R. F.; El-Baba, C.; Alameddine, M.; Naja, F.                                         | 2018 | Evidence-based Complementary and Alternative Medicine     | 20<br>18 | 416<br>915<br>9            | Exclusion reason: Does not report naturopathic consultations; |
| 27 | <b>Use of complementary and alternative medicine in Europe: Health-related and sociodemographic determinants</b>                                                                                     | Kemppainen, Laura M.; Kemppainen, Teemu T.; Reippainen, Jutta A.; Salmenniemi, Suvi T.; Vuolanto, Pia H.    | 2018 | Scandinavian Journal of Public Health                     | 46       | 4<br>448-<br>455           | Exclusion reason: Does not report naturopathic consultations; |
| 30 | <b>Complementary and alternative medicine usage in patients for different ailments in rural region of malwa area of punjab: A cross-sectional study</b>                                              | Kaur, K.; Singh, B.; Kaur, G.                                                                               | 2016 | National Journal of Physiology, Pharmacy and Pharmacology | 6        | 5<br>394-<br>398           | Exclusion reason: Does not report naturopathic consultations; |
| 33 | <b>Determinants of patients preferring Complementary and Alternative medicine attending public hospitals in Lahore, Pakistan</b>                                                                     | Hussain, A.; Ayesha.; Mufti, R. K.; Shahid, M.; Hassan, M. N.; Sultan, T.; Zahid, M. N.; Ali, I.; Iqbal, H. | 2018 | Journal of the Pakistan Medical Association               | 68       | 6<br>914-<br>918           | Exclusion reason: Does not report naturopathic consultations; |
| 36 | <b>State and Regional Comparisons of the Use of Complementary Health Approaches: National Health Interview Survey, 2012</b>                                                                          | Jones, Lindsey; Peregoy, Jennifer; Stussman, Barbara; Nahin, Richard                                        | 2014 | Journal of Alternative & Complementary Medicine           | 20       | 5<br>A14<br>3-<br>A14<br>3 | Exclusion reason: Conference abstract only;                   |



1  
2  
3  
4  
5  
6  
7  
8  
9  
10  
11  
12  
13  
14  
15  
16  
17  
18  
19  
20  
21  
22  
23  
24  
25  
26  
27  
28  
29  
30  
31  
32  
33  
34  
35  
36  
37  
38  
39  
40  
41  
42  
43  
44  
45  
46

|                                                                                                                                                                      |                                                                                                                                                                 |      |                                                        |    |          |           |                                                               |
|----------------------------------------------------------------------------------------------------------------------------------------------------------------------|-----------------------------------------------------------------------------------------------------------------------------------------------------------------|------|--------------------------------------------------------|----|----------|-----------|---------------------------------------------------------------|
| <b>Knowledge, attitude and practice of complementary and alternative medicine: A patient's perspective</b>                                                           | Jaiswal, K. M.; Bajait, C. S.; Pimpalkhute, S. A.; Dakhle, G. N.; Sontakke, S. D.; Magdum, A.                                                                   | 2013 | Indian Journal of Pharmacology                         | 45 | SUPPL. 1 | S221      | Exclusion reason: Does not report naturopathic consultations; |
| <b>Use of complementary and alternative medicine within Norwegian hospitals</b>                                                                                      | Jacobsen, R.; Fjell, V. M.; Foss, N.; Kristoffersen, A. E.                                                                                                      | 2015 | BMC Complementary & Alternative Medicine               | 15 | 1        | 1-Jun     | Exclusion reason: Does not report naturopathic consultations; |
| <b>Association between belief and attitude toward preference of complementary alternative medicine use</b>                                                           | Islahudin, F.; Shahdan, I. A.; Mohamad-Samuri, S.                                                                                                               | 2017 | Patient Preference and Adherence                       | 11 |          | 913-918   | Exclusion reason: Does not report naturopathic consultations; |
| <b>Patients' use of CAM: Results from the Health Survey for England 2005</b>                                                                                         | Hunt, K. J.; Ernst, E.                                                                                                                                          | 2010 | Focus on Alternative and Complementary Therapies       | 15 | 2        | 101-103   | Exclusion reason: Does not report naturopathic consultations; |
| <b>The utilization of complementary and alternative medicine in Taiwan: An internet survey using an adapted version of the international questionnaire (I-CAM-Q)</b> | Huang, C. W.; Tran, D. N. H.; Li, T. F.; Sasaki, Y.; Lee, J. A.; Lee, M. S.; Arai, I.; Motoo, Y.; Yukawa, K.; Tsutani, K.; Ko, S. G.; Hwang, S. J.; Chen, F. P. | 2019 | Journal of the Chinese Medical Association             | 82 | 8        | 665-671   | Exclusion reason: Does not report naturopathic consultations; |
| <b>Utilization of complimentary and alternative health services in Iceland</b>                                                                                       | Helgadottir, B.; Vilhjalmsón, R.; Gunnarsdóttir, T. J.                                                                                                          | 2010 | Laeknabladid                                           | 96 | 4        | 267-273   | Exclusion reason: Does not report naturopathic consultations; |
| <b>The use of complementary and alternative medicine in Iceland: Results from a national health survey</b>                                                           | Gunnarsdóttir, T. J.; Orlygsdóttir, B.; Vilhjalmsón, R.                                                                                                         | 2019 | Scandinavian Journal of Public Health                  |    |          | 1.40 E+15 | Exclusion reason: Does not report naturopathic consultations; |
| <b>The Natural Medicine Workforce in Australia: A National Survey Part 1</b>                                                                                         | Grace, S.; Rogers, S.; Eddey, S.                                                                                                                                | 2013 | Journal of the Australian Traditional-Medicine Society | 19 | 1        | 13-18     | Exclusion reason: Does not report naturopathic consultations; |
| <b>The natural medicine workforce in Australia: A national survey Part 2</b>                                                                                         | Grace, S.; Rogers, S.; Eddey, S.                                                                                                                                | 2013 | Journal of the Australian Traditional-Medicine Society | 19 | 2        | 79-86     | Exclusion reason: Does not report naturopathic consultations; |
| <b>Complementary alternative medicine (CAM) use in Ireland: A secondary analysis of SLAN data</b>                                                                    | Fox, P.; Coughlan, B.; Butler, M.; Kelleher, C.                                                                                                                 | 2010 | Complementary Therapies in Medicine                    | 18 | 2        | 95-103    | Exclusion reason: Does not report naturopathic consultations; |
| <b>Who uses complementary and alternative therapies in regional South Australia? Evidence from the Whyalla Intergenerational Study of Health</b>                     | D'Onise, K.; Haren, M. T.; Misan, G. M. H.; McDermott, R. A.                                                                                                    | 2013 | Australian Health Review                               | 37 | 1        | 104-111   | Exclusion reason: Does not report naturopathic consultations; |

|    |                                                                                                                                                            |                                                                                                       |      |                                                        |         |       |           |                                                               |  |
|----|------------------------------------------------------------------------------------------------------------------------------------------------------------|-------------------------------------------------------------------------------------------------------|------|--------------------------------------------------------|---------|-------|-----------|---------------------------------------------------------------|--|
| 1  |                                                                                                                                                            |                                                                                                       |      |                                                        |         |       |           |                                                               |  |
| 2  |                                                                                                                                                            |                                                                                                       |      |                                                        |         |       |           |                                                               |  |
| 3  | <b>The characteristics, experiences and perceptions of naturopathic and herbal medicine practitioners: results from a national survey in New Zealand</b>   | Cottingham, P.; Adams, J.; Vempati, R.; Dunn, J.; Sibbritt, D.                                        | 2015 | Journal of the Australian Traditional-Medicine Society | 21      | 2     | 130-130   | Exclusion reason: Does not report naturopathic consultations; |  |
| 4  |                                                                                                                                                            |                                                                                                       |      |                                                        |         |       |           |                                                               |  |
| 5  |                                                                                                                                                            |                                                                                                       |      |                                                        |         |       |           |                                                               |  |
| 6  | <b>Integration of complementary and alternative medicine into medical schools in Austria, Germany and Switzerland - Results of a cross-sectional study</b> | Brinkhaus, B.; Witt, C. M.; Jena, S.; Bockelbrink, A.; Ortiz, M.; Willich, S. N.                      | 2011 | Wiener Medizinische Wochenschrift                      | 16<br>1 | 1-Feb | 32-43     | Exclusion reason: Does not report naturopathic consultations; |  |
| 7  |                                                                                                                                                            |                                                                                                       |      |                                                        |         |       |           |                                                               |  |
| 8  |                                                                                                                                                            |                                                                                                       |      |                                                        |         |       |           |                                                               |  |
| 9  |                                                                                                                                                            |                                                                                                       |      |                                                        |         |       |           |                                                               |  |
| 10 | <b>The use of complementary therapies in Chile: Results from the national health survey 2010-2011</b>                                                      | Bedregal, P.; Passi, A.; Guerra, X.; Chang, M.                                                        | 2016 | Journal of Alternative and Complementary Medicine      | 22      | 6     | A103-A104 | Exclusion reason: Conference abstract only;                   |  |
| 11 |                                                                                                                                                            |                                                                                                       |      |                                                        |         |       |           |                                                               |  |
| 12 |                                                                                                                                                            |                                                                                                       |      |                                                        |         |       |           |                                                               |  |
| 13 | <b>Complementary and Alternative Medicine (CAM) among adults in Italy: Use and related satisfaction</b>                                                    | Barbadoro, P.; Chiatti, C.; D'Errico, M. M.; Minelli, A.; Pennacchietti, L.; Ponzio, E.; Prospero, E. | 2011 | European Journal of Integrative Medicine               | 3       | 4     | e319-e326 | Exclusion reason: Does not report naturopathic consultations; |  |
| 14 |                                                                                                                                                            |                                                                                                       |      |                                                        |         |       |           |                                                               |  |
| 15 |                                                                                                                                                            |                                                                                                       |      |                                                        |         |       |           |                                                               |  |
| 16 | <b>A preliminary study of complementary and alternative medicine (CAM) practitioners in Singapore</b>                                                      | Ang, S. C.; Wilkinson, J. M.                                                                          | 2013 | Complementary Therapies in Medicine                    | 21      | 1     | 42-49     | Exclusion reason: Does not report naturopathic consultations; |  |
| 17 |                                                                                                                                                            |                                                                                                       |      |                                                        |         |       |           |                                                               |  |
| 18 |                                                                                                                                                            |                                                                                                       |      |                                                        |         |       |           |                                                               |  |
| 19 |                                                                                                                                                            |                                                                                                       |      |                                                        |         |       |           |                                                               |  |
| 20 | <b>Use of complementary and alternative medicine among asthmatic patients in primary care clinics in Malaysia</b>                                          | Alshagga, M. A.; Al-Dubai, S. A.; Muhamad Faiq, S. S.; Yusuf, A. A.                                   | 2011 | Annals of Thoracic Medicine                            | 6       | 3     | 115-119   | Exclusion reason: Does not report naturopathic consultations; |  |
| 21 |                                                                                                                                                            |                                                                                                       |      |                                                        |         |       |           |                                                               |  |
| 22 |                                                                                                                                                            |                                                                                                       |      |                                                        |         |       |           |                                                               |  |
| 23 | <b>Knowledge, attitude and practice toward complementary and traditional medicine among Kashan health care staff, 2012</b>                                 | Adib-Hajbaghery, M.; Hoseinian, M.                                                                    | 2014 | Complementary Therapies in Medicine                    | 22      | 1     | 126-132   | Exclusion reason: Does not report naturopathic consultations; |  |
| 24 |                                                                                                                                                            |                                                                                                       |      |                                                        |         |       |           |                                                               |  |
| 25 |                                                                                                                                                            |                                                                                                       |      |                                                        |         |       |           |                                                               |  |
| 26 | <b>A survey of complementary and alternative medicine in Iran</b>                                                                                          | Abolhassani, Hassan; Naseri, Mohsen; Mahmoudzadeh, Sanam                                              | 2012 | Chinese Journal of Integrative Medicine                | 18      | 6     | 409-416   | Exclusion reason: Does not report naturopathic consultations; |  |
| 27 |                                                                                                                                                            |                                                                                                       |      |                                                        |         |       |           |                                                               |  |
| 28 |                                                                                                                                                            |                                                                                                       |      |                                                        |         |       |           |                                                               |  |
| 29 |                                                                                                                                                            |                                                                                                       |      |                                                        |         |       |           |                                                               |  |
| 30 |                                                                                                                                                            |                                                                                                       |      |                                                        |         |       |           |                                                               |  |
| 31 |                                                                                                                                                            |                                                                                                       |      |                                                        |         |       |           |                                                               |  |
| 32 |                                                                                                                                                            |                                                                                                       |      |                                                        |         |       |           |                                                               |  |
| 33 |                                                                                                                                                            |                                                                                                       |      |                                                        |         |       |           |                                                               |  |
| 34 |                                                                                                                                                            |                                                                                                       |      |                                                        |         |       |           |                                                               |  |
| 35 |                                                                                                                                                            |                                                                                                       |      |                                                        |         |       |           |                                                               |  |
| 36 |                                                                                                                                                            |                                                                                                       |      |                                                        |         |       |           |                                                               |  |
| 37 |                                                                                                                                                            |                                                                                                       |      |                                                        |         |       |           |                                                               |  |
| 38 |                                                                                                                                                            |                                                                                                       |      |                                                        |         |       |           |                                                               |  |
| 39 |                                                                                                                                                            |                                                                                                       |      |                                                        |         |       |           |                                                               |  |
| 40 |                                                                                                                                                            |                                                                                                       |      |                                                        |         |       |           |                                                               |  |
| 41 |                                                                                                                                                            |                                                                                                       |      |                                                        |         |       |           |                                                               |  |
| 42 |                                                                                                                                                            |                                                                                                       |      |                                                        |         |       |           |                                                               |  |
| 43 |                                                                                                                                                            |                                                                                                       |      |                                                        |         |       |           |                                                               |  |
| 44 |                                                                                                                                                            |                                                                                                       |      |                                                        |         |       |           |                                                               |  |
| 45 |                                                                                                                                                            |                                                                                                       |      |                                                        |         |       |           |                                                               |  |
| 46 |                                                                                                                                                            |                                                                                                       |      |                                                        |         |       |           |                                                               |  |

1  
2  
3  
4  
5  
6  
7  
8  
9  
10  
11  
12  
13  
14  
15  
16  
17  
18  
19  
20  
21  
22  
23  
24  
25  
26  
27  
28  
29  
30  
31  
32  
33  
34  
35  
36  
37  
38  
39  
40  
41  
42  
43  
44  
45  
46

Supplementary File 2: List of national surveys from WNF member countries, with reference to inclusion of items examining naturopathy use

| Country             | Report/survey identified/ located                                                                                                                                                                                                                                                 | Inclusion of naturopathy-specific item | Prevalence timeframe | Date last collected | Other dates collected    | Item/s | Data accessibility                                                                                                                                                                                                                                                     |
|---------------------|-----------------------------------------------------------------------------------------------------------------------------------------------------------------------------------------------------------------------------------------------------------------------------------|----------------------------------------|----------------------|---------------------|--------------------------|--------|------------------------------------------------------------------------------------------------------------------------------------------------------------------------------------------------------------------------------------------------------------------------|
| <b>FULL MEMBERS</b> |                                                                                                                                                                                                                                                                                   |                                        |                      |                     |                          |        |                                                                                                                                                                                                                                                                        |
| Australia           | National Health Survey                                                                                                                                                                                                                                                            | Absent                                 |                      | 2021                |                          |        |                                                                                                                                                                                                                                                                        |
| Belgium             | Health Interview Survey<br><a href="https://his.wiv-isp.be/fr/Documents%20partages/Summ_HC_FR_2018.pdf">https://his.wiv-isp.be/fr/Documents%20partages/Summ_HC_FR_2018.pdf</a>                                                                                                    | Absent                                 |                      | 2018                | Every 2 years from 1997  |        |                                                                                                                                                                                                                                                                        |
| Brazil              | National Health Survey - PNS<br>Table 3.21<br><a href="https://www.ibge.gov.br/en/statistics/social/health/16840-national-survey-of-health.html?=&amp;t=downloads">https://www.ibge.gov.br/en/statistics/social/health/16840-national-survey-of-health.html?=&amp;t=downloads</a> | Absent                                 |                      | 2019                | 2013                     |        | Appears to be available at link<br><a href="https://www.ibge.gov.br/en/statistics/social/health/16840-national-survey-of-health.html?=&amp;t=downloads">https://www.ibge.gov.br/en/statistics/social/health/16840-national-survey-of-health.html?=&amp;t=downloads</a> |
| Canada              | Canadian Health Measures Survey                                                                                                                                                                                                                                                   | Absent                                 |                      | 2019                | Every 2 years since 2011 | -      |                                                                                                                                                                                                                                                                        |
| Canada              | Canadian National Health Survey                                                                                                                                                                                                                                                   | Absent                                 | -                    | 2016                |                          | -      | CNHS: <a href="https://www.statcan.gc.ca/eng/surveys?MM=1">https://www.statcan.gc.ca/eng/surveys?MM=1</a>                                                                                                                                                              |

|        |                                   |                                                              |              |                         |                          |                                                                                                                                                                                                                                                                                                                                                                                                            |                                                                                                                                                                                                                                                                                                                                                                                                                                                                                                                                                                                                                                                                                                                                                                                                                                                                                                                                                                                                                                                                                                                                                                                                                                                                                                                 |
|--------|-----------------------------------|--------------------------------------------------------------|--------------|-------------------------|--------------------------|------------------------------------------------------------------------------------------------------------------------------------------------------------------------------------------------------------------------------------------------------------------------------------------------------------------------------------------------------------------------------------------------------------|-----------------------------------------------------------------------------------------------------------------------------------------------------------------------------------------------------------------------------------------------------------------------------------------------------------------------------------------------------------------------------------------------------------------------------------------------------------------------------------------------------------------------------------------------------------------------------------------------------------------------------------------------------------------------------------------------------------------------------------------------------------------------------------------------------------------------------------------------------------------------------------------------------------------------------------------------------------------------------------------------------------------------------------------------------------------------------------------------------------------------------------------------------------------------------------------------------------------------------------------------------------------------------------------------------------------|
| Canada | National Population Health Survey | Present but combined with other health service (homeopathy ) | 12 month use | 2010/11                 | Every 2 years since 1992 | A) People may also use alternative or complementary medicine. In the past 12 months, [have/has] [you/FNAME] seen or talked on the telephone to an alternative health care provider such as an acupuncturist, homeopath or massage therapist about [your/his/her] physical, emotional or mental health?<br>B) Who did you speak to (answer option is "homeopath or naturopath")                             | <p><a href="https://crdcn.org/datasets/nphs-national-population-health-survey">https://crdcn.org/datasets/nphs-national-population-health-survey</a><br/> <a href="https://crdcn.org/research">https://crdcn.org/research</a></p> <p>Application process for academic researchers<br/>                     Researchers wishing to access the RDC should create an account on the Statistics Canada Microdata Access Platform and follow the steps to create a new proposal. The proposal is evaluated by Statistics Canada for feasibility before access can be granted. In addition, if you are a student, your thesis supervisor must write a letter in support of your RDC application and join the application as a co-investigator. For other academic users, a completed peer-review may be required. The review must be conducted by a tenured faculty-member at an accredited Canadian university. Researchers who are required to submit such a peer review can source their own peer reviewer, or contact CRDCN for assistance if they are unable to find a suitable candidate.<br/>                     Access fees for certain users<br/>                     Fees can apply to certain research projects conducted in the RDCs. Consult the Access &amp; Fee-For-Service Policy to learn more.</p> |
| Chile  | National Health Survey            | Absent                                                       |              | Unclear - maybe 2016/17 | Every 4 years            | Appears to exist, but cannot locate a recent copy of the survey or results. An earlier version (2009-10) suggests use of CAM was assessed, but all CAM were grouped together as one variable.<br><a href="https://www.who.int/fctc/reporting/party_reports/chile_annex1_national_health_survey_2010.pdf">https://www.who.int/fctc/reporting/party_reports/chile_annex1_national_health_survey_2010.pdf</a> | Maybe somewhere on this site (might need a Spanish-speaker):<br><a href="https://deis.minsal.cl/#estadisticas">https://deis.minsal.cl/#estadisticas</a>                                                                                                                                                                                                                                                                                                                                                                                                                                                                                                                                                                                                                                                                                                                                                                                                                                                                                                                                                                                                                                                                                                                                                         |
| Cyprus | "State of health" survey          | Absent                                                       |              | 2019                    |                          |                                                                                                                                                                                                                                                                                                                                                                                                            | <p><a href="https://ec.europa.eu/health/sites/health/files/state/docs/2019_chp_cyprus_english.pdf">https://ec.europa.eu/health/sites/health/files/state/docs/2019_chp_cyprus_english.pdf</a><br/> <a href="https://www.euro.who.int/__data/assets/pdf_file/0007/355975/Health-Profile-Cyprus-Eng.pdf">https://www.euro.who.int/__data/assets/pdf_file/0007/355975/Health-Profile-Cyprus-Eng.pdf</a></p>                                                                                                                                                                                                                                                                                                                                                                                                                                                                                                                                                                                                                                                                                                                                                                                                                                                                                                         |

1  
2  
3  
4  
5  
6  
7  
8  
9  
10  
11  
12  
13  
14  
15  
16  
17  
18  
19  
20  
21  
22  
23  
24  
25  
26  
27  
28  
29  
30  
31  
32  
33  
34  
35  
36  
37  
38  
39  
40  
41  
42  
43  
44  
45  
46

1  
2  
3  
4  
5  
6  
7  
8  
9  
10  
11  
12  
13  
14  
15  
16  
17  
18  
19  
20  
21  
22  
23  
24  
25  
26  
27  
28  
29  
30  
31  
32  
33  
34  
35  
36  
37  
38  
39  
40  
41  
42  
43  
44  
45  
46

|                              |                                                                    |        |  |                                   |                                    |  |                                                                                                                                                                                                                                                                                                                                 |
|------------------------------|--------------------------------------------------------------------|--------|--|-----------------------------------|------------------------------------|--|---------------------------------------------------------------------------------------------------------------------------------------------------------------------------------------------------------------------------------------------------------------------------------------------------------------------------------|
| Democratic Republic of Congo | DHS Demographic and Health Survey                                  | Absent |  | 2013-2014                         |                                    |  | <a href="https://www.dhsprogram.com/pubs/pdf/FR300/FR300.pdf">https://www.dhsprogram.com/pubs/pdf/FR300/FR300.pdf</a>                                                                                                                                                                                                           |
| Ecuador                      | Health survey                                                      | Absent |  | 2017                              |                                    |  | <a href="https://www.ecuadorencifras.gob.ec/documentos/web-inec/Estadisticas_Sociales/Recursos_Actividades_de_Salud/RAS_2017/Principales_Resultados_%28RAS%29.pdf">https://www.ecuadorencifras.gob.ec/documentos/web-inec/Estadisticas_Sociales/Recursos_Actividades_de_Salud/RAS_2017/Principales_Resultados_%28RAS%29.pdf</a> |
| Egypt                        | DHS Demographic and Health survey                                  | Absent |  | 2015                              | 2014, 2008, 2005                   |  | <a href="https://dhsprogram.com/pubs/pdf/FR313/FR313.pdf">https://dhsprogram.com/pubs/pdf/FR313/FR313.pdf</a>                                                                                                                                                                                                                   |
| El Salvador                  | National Family Health Survey                                      | Absent |  | 2008                              |                                    |  | file:///C:/Users/User/AppData/Local/Temp/Cuestionario_El%20Salvador%202008_Nombre%20de%20variables.pdf                                                                                                                                                                                                                          |
| France                       | National Health and Nutrition Survey                               | Absent |  | 2006                              |                                    |  | file:///C:/Users/User/AppData/Local/Temp/26327_7069-rapp-inst-enns-web.pdf                                                                                                                                                                                                                                                      |
| Greece                       | Hellenic National Nutrition and Health Survey                      | Absent |  | 2013-2015                         |                                    |  |                                                                                                                                                                                                                                                                                                                                 |
| Greece                       | World Health Survey                                                | Absent |  | 2003                              |                                    |  |                                                                                                                                                                                                                                                                                                                                 |
| Greece                       | Greek National Survey on Health and Nutrition (the HYDRIA Proejct) | Absent |  | 2009-2011                         |                                    |  |                                                                                                                                                                                                                                                                                                                                 |
| Hong Kong                    | Population Health Survey and Health Behaviour Survey               | Absent |  | 2018/19 (report not yet released) | 2014/15, 2003/04                   |  |                                                                                                                                                                                                                                                                                                                                 |
| India                        | DHS Demographic and Health survey                                  | Absent |  | 2019-20                           | 2015-16, 2005-06, 1998-99, 1992-93 |  |                                                                                                                                                                                                                                                                                                                                 |

|   |       |                                                                      |                                                       |                                                                                                                                                                                                                            |         |                                          |                                                                                                                                                                    |                                                                                                              |
|---|-------|----------------------------------------------------------------------|-------------------------------------------------------|----------------------------------------------------------------------------------------------------------------------------------------------------------------------------------------------------------------------------|---------|------------------------------------------|--------------------------------------------------------------------------------------------------------------------------------------------------------------------|--------------------------------------------------------------------------------------------------------------|
| 1 | India | NFHS - National Family Health Survey                                 | Present but combined with other health service (yoga) | Generally used when sick (household questionnaire)                                                                                                                                                                         | 2019-20 | 2015-16<br>2005-06<br>1998-99<br>1992-93 | Q. When members of your household get sick, where do they generally go for treatment?<br>A. (option) Yoga and Naturopathy [also separates into public and private] | Process is unclear?<br><a href="http://rchiips.org/nfhs/data1.shtml">http://rchiips.org/nfhs/data1.shtml</a> |
| 2 |       |                                                                      |                                                       | Men's and women's questionnaires also asks about places to receive family planning, where they take children when sick, and a number of other specific details relating to health care utilisation around family planning. |         |                                          |                                                                                                                                                                    |                                                                                                              |
| 3 | India | AHS - Annual Health Survey                                           | Absent                                                |                                                                                                                                                                                                                            |         |                                          |                                                                                                                                                                    |                                                                                                              |
| 4 | Italy | ISSP - International Social Survey Programme: Health and Health Care | Absent                                                | 12 month use                                                                                                                                                                                                               | 2011    |                                          | During the past 12 months, how often did you visit or were visited by... an [alternative/traditional/folk]health care practitioner?                                | <a href="https://search.gesis.org/research_data/ZA5800">https://search.gesis.org/research_data/ZA5800</a>    |
| 5 | Italy | Italy National Healthy Survey                                        | <b>Unknown due to survey availability</b>             |                                                                                                                                                                                                                            |         |                                          |                                                                                                                                                                    |                                                                                                              |

1  
2  
3  
4  
5  
6  
7  
8  
9  
10  
11  
12  
13  
14  
15  
16  
17  
18  
19  
20  
21  
22  
23  
24  
25  
26  
27  
28  
29  
30  
31  
32  
33  
34  
35  
36  
37  
38  
39  
40  
41  
42  
43  
44  
45  
46

|             |                                                               |                                                                        |                                                                                                  |         |                                       |                                                                                                                                                                                                                                    |                                                                                                                                                                                                                                                                                                                                                                                                                                                                                                                                                                                                                                                                                             |
|-------------|---------------------------------------------------------------|------------------------------------------------------------------------|--------------------------------------------------------------------------------------------------|---------|---------------------------------------|------------------------------------------------------------------------------------------------------------------------------------------------------------------------------------------------------------------------------------|---------------------------------------------------------------------------------------------------------------------------------------------------------------------------------------------------------------------------------------------------------------------------------------------------------------------------------------------------------------------------------------------------------------------------------------------------------------------------------------------------------------------------------------------------------------------------------------------------------------------------------------------------------------------------------------------|
| Italy       | EHIS - European Health Interview Survey                       | Absent                                                                 |                                                                                                  | 2019    | 2015                                  |                                                                                                                                                                                                                                    | <a href="https://www.istat.it/en/archivio/210553">https://www.istat.it/en/archivio/210553</a>                                                                                                                                                                                                                                                                                                                                                                                                                                                                                                                                                                                               |
| Japan       | The Japan National Health and Nutrition Survey (NHNS)         | Absent                                                                 |                                                                                                  |         |                                       |                                                                                                                                                                                                                                    |                                                                                                                                                                                                                                                                                                                                                                                                                                                                                                                                                                                                                                                                                             |
| Malaysia    | National Health and Morbidity Survey                          | Absent                                                                 |                                                                                                  |         |                                       |                                                                                                                                                                                                                                    | <a href="https://iptk.moh.gov.my/images/technical_report/2020/FactSheet_BI_AUG2020.pdf">https://iptk.moh.gov.my/images/technical_report/2020/FactSheet_BI_AUG2020.pdf</a>                                                                                                                                                                                                                                                                                                                                                                                                                                                                                                                   |
| Mexico      | National Health Survey (ENSA)                                 | Present (as 'Naturista')                                               | Unclear                                                                                          | 2018-19 | 2016<br>2012<br>2006                  | Q4.8:<br><a href="https://en.www.inegi.org.mx/contenidos/programas/ensanut/2018/doc/ensanut_2018_cuestionario_hogar.pdf">https://en.www.inegi.org.mx/contenidos/programas/ensanut/2018/doc/ensanut_2018_cuestionario_hogar.pdf</a> | <a href="https://en.www.inegi.org.mx/programas/ensanut/2018/">https://en.www.inegi.org.mx/programas/ensanut/2018/</a>                                                                                                                                                                                                                                                                                                                                                                                                                                                                                                                                                                       |
| Nepal       | DHS Demographic and Health survey                             | Absent                                                                 |                                                                                                  |         |                                       |                                                                                                                                                                                                                                    |                                                                                                                                                                                                                                                                                                                                                                                                                                                                                                                                                                                                                                                                                             |
| Nepal       | Noncommunicable Disease Risk Factors: STEPS Survey Nepal 2019 | Present but combined with other health services (traditional medicine) | For specific health conditions - Normal source of treatment For smoking cessation - 12 month use | 2019    |                                       | "During the past 12 months, what did you do to try and stop smoking?"<br>"Where do you usually go for treatment or advice for you >condition<?"<br>"Where do you usually get your drugs for >condition<?"                          | <a href="https://www.who.int/docs/default-source/nepal-documents/ncds/ncd-steps-survey-2019-compressed.pdf?sfvrsn=807bc4c6_2">https://www.who.int/docs/default-source/nepal-documents/ncds/ncd-steps-survey-2019-compressed.pdf?sfvrsn=807bc4c6_2</a>                                                                                                                                                                                                                                                                                                                                                                                                                                       |
| New Zealand | New Zealand Health Survey                                     | Absent                                                                 |                                                                                                  |         |                                       |                                                                                                                                                                                                                                    | <a href="https://www.health.govt.nz/publication/questionnaires-and-content-guide-2019-20-new-zealand-health-survey">https://www.health.govt.nz/publication/questionnaires-and-content-guide-2019-20-new-zealand-health-survey</a>                                                                                                                                                                                                                                                                                                                                                                                                                                                           |
| Nigeria     | DHS Demographic and Health survey                             | Absent                                                                 |                                                                                                  |         |                                       |                                                                                                                                                                                                                                    |                                                                                                                                                                                                                                                                                                                                                                                                                                                                                                                                                                                                                                                                                             |
| Peru        | ENCUESTA DEMOGRÁFICA Y DE SALUD FAMILIAR (ENDES)              | Absent                                                                 |                                                                                                  |         |                                       |                                                                                                                                                                                                                                    | <a href="http://inei.inei.gob.pe/microdatos/">http://inei.inei.gob.pe/microdatos/</a>                                                                                                                                                                                                                                                                                                                                                                                                                                                                                                                                                                                                       |
| Portugal    | National Health Survey                                        | Absent                                                                 |                                                                                                  | 2019    | 2018<br>2017<br>2016<br>etc. annually |                                                                                                                                                                                                                                    | <a href="https://www.ine.pt/xportal/xmain?PORTLET_ID=JSP&amp;xpgid=ine_publicacoes&amp;xpid=INE&amp;PORTLET_NAME=ine_cont_header_pub_en&amp;PORTLET_UID=%23JSP%3Aine_cont_header_pub_en%23&amp;PUBLICACOESstema=00&amp;PUBLICACOESdata_inicial=01-07-2014&amp;PUBLICACOESdata_final=13-07-2021&amp;x=14&amp;y=10&amp;PUBLICACOESfreeText=health">https://www.ine.pt/xportal/xmain?PORTLET_ID=JSP&amp;xpgid=ine_publicacoes&amp;xpid=INE&amp;PORTLET_NAME=ine_cont_header_pub_en&amp;PORTLET_UID=%23JSP%3Aine_cont_header_pub_en%23&amp;PUBLICACOESstema=00&amp;PUBLICACOESdata_inicial=01-07-2014&amp;PUBLICACOESdata_final=13-07-2021&amp;x=14&amp;y=10&amp;PUBLICACOESfreeText=health</a> |

|              |                                                                                  |                                    |  |      |                         |                                                                                                                                                                                                                                                                                         |
|--------------|----------------------------------------------------------------------------------|------------------------------------|--|------|-------------------------|-----------------------------------------------------------------------------------------------------------------------------------------------------------------------------------------------------------------------------------------------------------------------------------------|
| Puerto Rico  | Unknown                                                                          |                                    |  |      |                         |                                                                                                                                                                                                                                                                                         |
|              | Longitudinal Monitoring Survey of HSE (health service questions in Adult survey) |                                    |  |      |                         |                                                                                                                                                                                                                                                                                         |
| Russia       |                                                                                  | Absent                             |  | 2019 | 1994 onward             | <a href="https://rlms-hse.cpc.unc.edu/">https://rlms-hse.cpc.unc.edu/</a>                                                                                                                                                                                                               |
| Russia       | Kantar National Health and Wellness Survey                                       | Unknown due to survey availability |  | 2011 |                         | <a href="https://www.kantar.com/expertise/health/da---real-world-data-pros-claims-and-health-records/national-health-and-wellness-survey-nhws">https://www.kantar.com/expertise/health/da---real-world-data-pros-claims-and-health-records/national-health-and-wellness-survey-nhws</a> |
| Saudi Arabia | World Health Survey Saudi Arabia (KSAWHS)                                        | Absent                             |  | 2019 |                         | <a href="https://www.moh.gov.sa/en/Ministry/Statistics/Population-Health-Indicators/Documents/World-Health-Survey-Saudi-Arabia.pdf">https://www.moh.gov.sa/en/Ministry/Statistics/Population-Health-Indicators/Documents/World-Health-Survey-Saudi-Arabia.pdf</a>                       |
| Saudi Arabia | Saudi Health Interview Survey                                                    | Absent                             |  | 2013 |                         | <a href="http://www.healthdata.org/sites/default/files/files/Projects/KSA/Saudi-Health-Interview-Survey-Results.pdf">http://www.healthdata.org/sites/default/files/files/Projects/KSA/Saudi-Health-Interview-Survey-Results.pdf</a>                                                     |
| Saudi Arabia | Saudi Health Interview Census                                                    | Unknown due to survey availability |  | 2015 |                         |                                                                                                                                                                                                                                                                                         |
| Slovenia     | World Health Survey                                                              | Absent                             |  |      |                         |                                                                                                                                                                                                                                                                                         |
| Slovenia     | European Health Interview Survey                                                 | Absent                             |  | 2007 |                         | <a href="https://www.stat.si/doc/pub/IVZ-angl.pdf">https://www.stat.si/doc/pub/IVZ-angl.pdf</a><br><a href="https://ec.europa.eu/eurostat/web/microdata/european-health-interview-survey">https://ec.europa.eu/eurostat/web/microdata/european-health-interview-survey</a>              |
| South Africa | South Africa Demographic and Health Survey (DHS)                                 | Absent                             |  | 2016 | 2003                    | <a href="https://dhsprogram.com/pubs/pdf/FR337/FR337.pdf">https://dhsprogram.com/pubs/pdf/FR337/FR337.pdf</a>                                                                                                                                                                           |
| South Africa | South African Health and Nutrition Examination Survey (SANHANES-1)               | Absent                             |  | 2012 |                         | file:///C:/Users/User/AppData/Local/Temp/7844.pdf                                                                                                                                                                                                                                       |
| Spain        | National Health Survey                                                           | Absent                             |  | 2017 | 2011-12<br>2006<br>2003 |                                                                                                                                                                                                                                                                                         |



|                                   |                                 |         |                                                                            |                              |              |                                                                                                                                                                                                                                                                   |                                                                                                                                                                                                                                                                                                                                                                                                                                                                                    |
|-----------------------------------|---------------------------------|---------|----------------------------------------------------------------------------|------------------------------|--------------|-------------------------------------------------------------------------------------------------------------------------------------------------------------------------------------------------------------------------------------------------------------------|------------------------------------------------------------------------------------------------------------------------------------------------------------------------------------------------------------------------------------------------------------------------------------------------------------------------------------------------------------------------------------------------------------------------------------------------------------------------------------|
| Switzerland                       | Swiss Health Survey             | Present | 12 month use                                                               | 2017                         | 2012<br>2007 | How often have you been to one of the following specialists in the last 12 months:<br>Naturopath                                                                                                                                                                  | Available from the Swiss Federal Statistical Office<br><a href="http://www.bfs.admin.ch/bfs/portal/de/index/infothek/erhebungen__quelle/blank/blank/ess/04.html">http://www.bfs.admin.ch/bfs/portal/de/index/infothek/erhebungen__quelle/blank/blank/ess/04.html</a><br><br>2012 and 2007 data reported here:<br><a href="https://journals.plos.org/plosone/article?id=10.1371/journal.pone.0141985">https://journals.plos.org/plosone/article?id=10.1371/journal.pone.0141985</a> |
| United Kingdom - England          | Health Survey for England (HSE) | Absent  |                                                                            | 2019                         | Annually     |                                                                                                                                                                                                                                                                   | <a href="https://digital.nhs.uk/data-and-information/publications/statistical/health-survey-for-england/2019">https://digital.nhs.uk/data-and-information/publications/statistical/health-survey-for-england/2019</a>                                                                                                                                                                                                                                                              |
| United Kingdom - Scotland         | Scottish Health Survey          | Absent  | By health condition, 12 month use                                          | 2020                         | Annually     | Have you received any treatment advice for >insert condition< from any of the people on this card:<br>Other alternative medicine professional                                                                                                                     | <a href="https://beta.ukdataservice.ac.uk/datacatalogue/studies/study?id=8737#!/documentation">https://beta.ukdataservice.ac.uk/datacatalogue/studies/study?id=8737#!/documentation</a>                                                                                                                                                                                                                                                                                            |
| United Kingdom - Wales            | National Survey for Wales       | Absent  | By health condition, 12 month use<br><br>Non-GP primary care, 12 month use | Rolling (monthly interviews) |              | In the last 12 months, which of these kinds of treatment or management have you had for >insert condition<:<br>Complementary therapies (e.g. acupuncture, massage)<br><br>In the last 12 months, which of these services have you used for yourself:<br>Osteopath | <a href="https://gov.wales/national-survey-wales-questionnaires">https://gov.wales/national-survey-wales-questionnaires</a>                                                                                                                                                                                                                                                                                                                                                        |
| United Kingdom - Northern Ireland | Health Survey Northern Ireland  | Absent  |                                                                            | 2019-20                      | Annually     |                                                                                                                                                                                                                                                                   | <a href="https://www.data-archive.ac.uk/home">https://www.data-archive.ac.uk/home</a>                                                                                                                                                                                                                                                                                                                                                                                              |

|                                                                                                                      |                                   |                                                                                                                                                       |                            |                           |         |                                        |                                                                                                                  |                                                                                                                                                                                                                                                                                    |
|----------------------------------------------------------------------------------------------------------------------|-----------------------------------|-------------------------------------------------------------------------------------------------------------------------------------------------------|----------------------------|---------------------------|---------|----------------------------------------|------------------------------------------------------------------------------------------------------------------|------------------------------------------------------------------------------------------------------------------------------------------------------------------------------------------------------------------------------------------------------------------------------------|
| 1<br>2<br>3<br>4<br>5<br>6<br>7<br>8<br>9<br>10<br>11                                                                | United Kingdom - Northern Ireland | Northern Ireland Life and Times Survey (I don't think this is actually a government survey - run by Queen's University Belfast and Ulster University) | Present - but only in 2005 | Use ever                  | 2005    | Annually, but CAM only covered in 2005 | Have you ever used naturpathy?                                                                                   | <a href="https://www.ark.ac.uk/nilt/datasets/">https://www.ark.ac.uk/nilt/datasets/</a><br><a href="https://www.ark.ac.uk/nilt/2005/Complementary_Medicine/COMTH8.html">https://www.ark.ac.uk/nilt/2005/Complementary_Medicine/COMTH8.html</a>                                     |
| 12<br>13<br>14                                                                                                       | Uruguay                           | Uruguay Continuous Household Survey                                                                                                                   | Absent                     |                           | 2020    | Annually                               |                                                                                                                  | <a href="https://www.ine.gub.uy/encuesta-continua-de-hogares1">https://www.ine.gub.uy/encuesta-continua-de-hogares1</a>                                                                                                                                                            |
| 15<br>16<br>17                                                                                                       | USA                               | National Health Interview Survey - CAM Supplement                                                                                                     | Present                    | 12 month use              | 2012    | 2007<br>2002                           |                                                                                                                  | <a href="https://www.cdc.gov/nchs/nhis/data-questionnaires-documentation.htm">https://www.cdc.gov/nchs/nhis/data-questionnaires-documentation.htm</a><br><a href="https://www.ncbi.nlm.nih.gov/pmc/articles/PMC4573565/">https://www.ncbi.nlm.nih.gov/pmc/articles/PMC4573565/</a> |
| 18<br>19                                                                                                             | Zambia                            | DHS Demographic and Health Survey                                                                                                                     | Absent                     |                           | 2018-19 |                                        |                                                                                                                  | <a href="https://microdata.worldbank.org/index.php/catalog/3597">https://microdata.worldbank.org/index.php/catalog/3597</a>                                                                                                                                                        |
| 20                                                                                                                   | <b>ASSOCIATE MEMBERS</b>          |                                                                                                                                                       |                            |                           |         |                                        |                                                                                                                  |                                                                                                                                                                                                                                                                                    |
| 21<br>22<br>23<br>24<br>25<br>26                                                                                     | Ireland                           | SLÁN - Survey of Lifestyle, Attitudes and Nutrition                                                                                                   | Absent                     | Use ever and 12 month use | 2007    | 2002<br>1998                           | Have you ever attended an alternative/complementary practitioner? (e.g. acupuncturist, homeopath, reflexologist) | <a href="https://www.ucd.ie/issda/data/surveyonlifestyleandattitudestonutritionslan/">https://www.ucd.ie/issda/data/surveyonlifestyleandattitudestonutritionslan/</a>                                                                                                              |
| 27<br>28<br>29<br>30<br>31<br>32<br>33<br>34<br>35<br>36<br>37<br>38<br>39<br>40<br>41<br>42<br>43<br>44<br>45<br>46 | Ireland                           | Healthy Ireland                                                                                                                                       | Absent                     |                           | 2018    | 2017<br>2016<br>2015                   |                                                                                                                  | <a href="https://www.ucd.ie/issda/data/healthyireland/">https://www.ucd.ie/issda/data/healthyireland/</a>                                                                                                                                                                          |

1  
2  
3  
4  
5  
6  
7  
8  
9  
10  
11  
12  
13  
14  
15  
16  
17  
18  
19  
20  
21  
22  
23  
24  
25  
26  
27  
28  
29  
30  
31  
32  
33  
34  
35  
36  
37  
38  
39  
40  
41  
42  
43  
44  
45  
46

|                            |                                                                                                                                                                                                                                                                                                                                                                                          |        |              |         |                     |                                                                                                                                                                                                                                                                                                                                                                                        |                                                                                                                                                                                                                       |
|----------------------------|------------------------------------------------------------------------------------------------------------------------------------------------------------------------------------------------------------------------------------------------------------------------------------------------------------------------------------------------------------------------------------------|--------|--------------|---------|---------------------|----------------------------------------------------------------------------------------------------------------------------------------------------------------------------------------------------------------------------------------------------------------------------------------------------------------------------------------------------------------------------------------|-----------------------------------------------------------------------------------------------------------------------------------------------------------------------------------------------------------------------|
| Norway                     | HUNT - The Trondelag Health Study<br><br>(Norway also has research centre - NAFKAM - which conducts national surveys on CAM, but they don't cover naturopathy in their list of professions <a href="https://nafkam.no/en/report-use-complementary-and-alternative-medicine-cam-norway-2018">https://nafkam.no/en/report-use-complementary-and-alternative-medicine-cam-norway-2018</a> ) | Absent | 12 month use |         |                     | HUNT 2 - During the last 12 months, have you visited any of the following: Other treatment provider (naturopath, reflexologist....)<br><br>HUNT 3, CAM suppl - How many times in the last 12 months have you been to an alternative practitioner? Which type of alternative treatment did you receive and who did you receive the treatment from?: Other type of alternative treatment | <a href="https://www.ntnu.edu/hunt/research">https://www.ntnu.edu/hunt/research</a><br><a href="https://www.ntnu.edu/hunt/data/que">https://www.ntnu.edu/hunt/data/que</a>                                            |
| Singapore                  | National Population Health Survey                                                                                                                                                                                                                                                                                                                                                        | Absent |              | 2018-19 | 2016-17             |                                                                                                                                                                                                                                                                                                                                                                                        | <a href="https://www.moh.gov.sg/docs/librariesprovider5/default-document-library/nphs-2019-survey-report.pdf">https://www.moh.gov.sg/docs/librariesprovider5/default-document-library/nphs-2019-survey-report.pdf</a> |
| Singapore                  | National Health Surveillance Survey                                                                                                                                                                                                                                                                                                                                                      | Absent |              | 2007    | 2001                |                                                                                                                                                                                                                                                                                                                                                                                        | <a href="https://www.singstat.gov.sg/find-data/search-by-theme/society/health/latest-data">https://www.singstat.gov.sg/find-data/search-by-theme/society/health/latest-data</a>                                       |
| Singapore                  | Singapore National Health Survey                                                                                                                                                                                                                                                                                                                                                         | Absent |              | 2010    | 2004<br>1998        |                                                                                                                                                                                                                                                                                                                                                                                        | <a href="https://www.singstat.gov.sg/find-data/search-by-theme/society/health/latest-data">https://www.singstat.gov.sg/find-data/search-by-theme/society/health/latest-data</a>                                       |
| <b>EDUCATIONAL MEMBERS</b> |                                                                                                                                                                                                                                                                                                                                                                                          |        |              |         |                     |                                                                                                                                                                                                                                                                                                                                                                                        |                                                                                                                                                                                                                       |
| Czech Republic             | HELEN (Health, Lifestyle and Environment) Study                                                                                                                                                                                                                                                                                                                                          | Absent |              | 2014    | Annually since 2003 |                                                                                                                                                                                                                                                                                                                                                                                        | <a href="http://www.szu.cz/publikace/studie-helen?lang=1">http://www.szu.cz/publikace/studie-helen?lang=1</a>                                                                                                         |
| Czech Republic             | World Health Survey                                                                                                                                                                                                                                                                                                                                                                      | Absent |              | 2003    |                     |                                                                                                                                                                                                                                                                                                                                                                                        | <a href="https://microdata.worldbank.org/index.php/catalog/1703">https://microdata.worldbank.org/index.php/catalog/1703</a>                                                                                           |
| Ghana                      | DHS Demographic and Health Survey                                                                                                                                                                                                                                                                                                                                                        | Absent |              | 2017    | 2014                |                                                                                                                                                                                                                                                                                                                                                                                        | <a href="https://dhsprogram.com/methodology/survey/survey-display-506.cfm">https://dhsprogram.com/methodology/survey/survey-display-506.cfm</a>                                                                       |

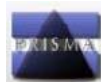

## PRISMA 2020 Checklist

| Section and Topic             | Item # | Checklist item                                                                                                                                                                                                                                                                                       | Location where item is reported |
|-------------------------------|--------|------------------------------------------------------------------------------------------------------------------------------------------------------------------------------------------------------------------------------------------------------------------------------------------------------|---------------------------------|
| <b>TITLE</b>                  |        |                                                                                                                                                                                                                                                                                                      |                                 |
| Title                         | 1      | Identify the report as a systematic review.                                                                                                                                                                                                                                                          | P1                              |
| <b>ABSTRACT</b>               |        |                                                                                                                                                                                                                                                                                                      |                                 |
| Abstract                      | 2      | See the PRISMA 2020 for Abstracts checklist.                                                                                                                                                                                                                                                         | P2 (compliant)                  |
| <b>INTRODUCTION</b>           |        |                                                                                                                                                                                                                                                                                                      |                                 |
| Rationale                     | 3      | Describe the rationale for the review in the context of existing knowledge.                                                                                                                                                                                                                          | P3                              |
| Objectives                    | 4      | Provide an explicit statement of the objective(s) or question(s) the review addresses.                                                                                                                                                                                                               | P3                              |
| <b>METHODS</b>                |        |                                                                                                                                                                                                                                                                                                      |                                 |
| Eligibility criteria          | 5      | Specify the inclusion and exclusion criteria for the review and how studies were grouped for the syntheses.                                                                                                                                                                                          | P4                              |
| Information sources           | 6      | Specify all databases, registers, websites, organisations, reference lists and other sources searched or consulted to identify studies. Specify the date when each source was last searched or consulted.                                                                                            | P4                              |
| Search strategy               | 7      | Present the full search strategies for all databases, registers and websites, including any filters and limits used.                                                                                                                                                                                 | Table 2                         |
| Selection process             | 8      | Specify the methods used to decide whether a study met the inclusion criteria of the review, including how many reviewers screened each record and each report retrieved, whether they worked independently, and if applicable, details of automation tools used in the process.                     | P4                              |
| Data collection process       | 9      | Specify the methods used to collect data from reports, including how many reviewers collected data from each report, whether they worked independently, any processes for obtaining or confirming data from study investigators, and if applicable, details of automation tools used in the process. | P4                              |
| Data items                    | 10a    | List and define all outcomes for which data were sought. Specify whether all results that were compatible with each outcome domain in each study were sought (e.g. for all measures, time points, analyses), and if not, the methods used to decide which results to collect.                        | P4                              |
|                               | 10b    | List and define all other variables for which data were sought (e.g. participant and intervention characteristics, funding sources). Describe any assumptions made about any missing or unclear information.                                                                                         | P4                              |
| Study risk of bias assessment | 11     | Specify the methods used to assess risk of bias in the included studies, including details of the tool(s) used, how many reviewers assessed each study and whether they worked independently, and if applicable, details of automation tools used in the process.                                    | P4-5                            |
| Effect measures               | 12     | Specify for each outcome the effect measure(s) (e.g. risk ratio, mean difference) used in the synthesis or presentation of results.                                                                                                                                                                  | P4-5                            |
| Synthesis methods             | 13a    | Describe the processes used to decide which studies were eligible for each synthesis (e.g. tabulating the study intervention characteristics and comparing against the planned groups for each synthesis (item #5)).                                                                                 | P4-5                            |
|                               | 13b    | Describe any methods required to prepare the data for presentation or synthesis, such as handling of missing summary statistics, or data conversions.                                                                                                                                                | P4-5                            |
|                               | 13c    | Describe any methods used to tabulate or visually display results of individual studies and syntheses.                                                                                                                                                                                               | P4-5                            |
|                               | 13d    | Describe any methods used to synthesize results and provide a rationale for the choice(s). If meta-analysis was performed, describe the model(s), method(s) to identify the presence and extent of statistical heterogeneity, and software package(s) used.                                          | P4-5                            |
|                               | 13e    | Describe any methods used to explore possible causes of heterogeneity among study results (e.g. subgroup analysis, meta-regression).                                                                                                                                                                 | P4-5                            |
|                               | 13f    | Describe any sensitivity analyses conducted to assess robustness of the synthesized results.                                                                                                                                                                                                         | P4-5                            |
| Reporting bias assessment     | 14     | Describe any methods used to assess risk of bias due to missing results in a synthesis (arising from reporting biases).                                                                                                                                                                              | P4                              |
| Certainty assessment          | 15     | Describe any methods used to assess certainty (or confidence) in the body of evidence for an outcome.                                                                                                                                                                                                | P4-5                            |

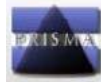

## PRISMA 2020 Checklist

| Section and Topic                              | Item # | Checklist item                                                                                                                                                                                                                                                                       | Location where item is reported |
|------------------------------------------------|--------|--------------------------------------------------------------------------------------------------------------------------------------------------------------------------------------------------------------------------------------------------------------------------------------|---------------------------------|
| <b>RESULTS</b>                                 |        |                                                                                                                                                                                                                                                                                      |                                 |
| Study selection                                | 16a    | Describe the results of the search and selection process, from the number of records identified in the search to the number of studies included in the review, ideally using a flow diagram.                                                                                         | P5                              |
|                                                | 16b    | Cite studies that might appear to meet the inclusion criteria, but which were excluded, and explain why they were excluded.                                                                                                                                                          | Supplementary File 1            |
| Study characteristics                          | 17     | Cite each included study and present its characteristics.                                                                                                                                                                                                                            | P5-6 & Tables 3&4               |
| Risk of bias in studies                        | 18     | Present assessments of risk of bias for each included study.                                                                                                                                                                                                                         | P6 & Table 5                    |
| Results of individual studies                  | 19     | For all outcomes, present, for each study: (a) summary statistics for each group (where appropriate) and (b) an effect estimate and its precision (e.g. confidence/credible interval), ideally using structured tables or plots.                                                     | Table 3 & 4                     |
| Results of syntheses                           | 20a    | For each synthesis, briefly summarise the characteristics and risk of bias among contributing studies.                                                                                                                                                                               | P6-7                            |
|                                                | 20b    | Present results of all statistical syntheses conducted. If meta-analysis was done, present for each the summary estimate and its precision (e.g. confidence/credible interval) and measures of statistical heterogeneity. If comparing groups, describe the direction of the effect. | P6-7                            |
|                                                | 20c    | Present results of all investigations of possible causes of heterogeneity among study results.                                                                                                                                                                                       | P6-7                            |
|                                                | 20d    | Present results of all sensitivity analyses conducted to assess the robustness of the synthesized results.                                                                                                                                                                           | n/a                             |
| Reporting biases                               | 21     | Present assessments of risk of bias due to missing results (arising from reporting biases) for each synthesis assessed.                                                                                                                                                              | P7                              |
| Certainty of evidence                          | 22     | Present assessments of certainty (or confidence) in the body of evidence for each outcome assessed.                                                                                                                                                                                  | n/a                             |
| <b>DISCUSSION</b>                              |        |                                                                                                                                                                                                                                                                                      |                                 |
| Discussion                                     | 23a    | Provide a general interpretation of the results in the context of other evidence.                                                                                                                                                                                                    | P7-9                            |
|                                                | 23b    | Discuss any limitations of the evidence included in the review.                                                                                                                                                                                                                      | P9                              |
|                                                | 23c    | Discuss any limitations of the review processes used.                                                                                                                                                                                                                                | P9                              |
|                                                | 23d    | Discuss implications of the results for practice, policy, and future research.                                                                                                                                                                                                       | P7-9                            |
| <b>OTHER INFORMATION</b>                       |        |                                                                                                                                                                                                                                                                                      |                                 |
| Registration and protocol                      | 24a    | Provide registration information for the review, including register name and registration number, or state that the review was not registered.                                                                                                                                       | P4                              |
|                                                | 24b    | Indicate where the review protocol can be accessed, or state that a protocol was not prepared.                                                                                                                                                                                       | P4                              |
|                                                | 24c    | Describe and explain any amendments to information provided at registration or in the protocol.                                                                                                                                                                                      | n/a                             |
| Support                                        | 25     | Describe sources of financial or non-financial support for the review, and the role of the funders or sponsors in the review.                                                                                                                                                        | n/a                             |
| Competing interests                            | 26     | Declare any competing interests of review authors.                                                                                                                                                                                                                                   | n/a                             |
| Availability of data, code and other materials | 27     | Report which of the following are publicly available and where they can be found: template data collection forms; data extracted from included studies; data used for all analyses; analytic code; any other materials used in the review.                                           | n/a                             |

From: Page MJ, McKenzie JE, Bossuyt PM, Boutron I, Hoffmann TC, Mulrow CD, et al. The PRISMA 2020 statement: an updated guideline for reporting systematic reviews. *BMJ* 2021;372:n71. doi: 10.1136/bmj.n71

For peer review only - <http://bmjopen.bmj.com/site/about/guidelines.xhtml>  
For more information, visit: <http://www.prisma-statement.org/>

# BMJ Open

## International prevalence of consultation with a naturopathic practitioner: a systematic review and meta-analysis

|                                 |                                                                                                                                                                                                                                                                                                                                                                                                                                                                                                                                                                                                                                                                                                                                                                                                                                                                                                                                                                                                                                                                                                                                                                                                               |
|---------------------------------|---------------------------------------------------------------------------------------------------------------------------------------------------------------------------------------------------------------------------------------------------------------------------------------------------------------------------------------------------------------------------------------------------------------------------------------------------------------------------------------------------------------------------------------------------------------------------------------------------------------------------------------------------------------------------------------------------------------------------------------------------------------------------------------------------------------------------------------------------------------------------------------------------------------------------------------------------------------------------------------------------------------------------------------------------------------------------------------------------------------------------------------------------------------------------------------------------------------|
| Journal:                        | <i>BMJ Open</i>                                                                                                                                                                                                                                                                                                                                                                                                                                                                                                                                                                                                                                                                                                                                                                                                                                                                                                                                                                                                                                                                                                                                                                                               |
| Manuscript ID                   | bmjopen-2021-056075.R1                                                                                                                                                                                                                                                                                                                                                                                                                                                                                                                                                                                                                                                                                                                                                                                                                                                                                                                                                                                                                                                                                                                                                                                        |
| Article Type:                   | Original research                                                                                                                                                                                                                                                                                                                                                                                                                                                                                                                                                                                                                                                                                                                                                                                                                                                                                                                                                                                                                                                                                                                                                                                             |
| Date Submitted by the Author:   | 04-Apr-2022                                                                                                                                                                                                                                                                                                                                                                                                                                                                                                                                                                                                                                                                                                                                                                                                                                                                                                                                                                                                                                                                                                                                                                                                   |
| Complete List of Authors:       | Steel, Amie; University of Technology Sydney, Australian Research Centre in Complementary and Integrative Medicine (ARCCIM)<br>Redmond, Rebecca; University of Technology Sydney<br>Schloss, Janet ; Southern Cross University<br>Cramer, Holger; University of Duisburg-Essen, Department of Internal and Integrative Medicine, Kliniken Essen-Mitte, Faculty of Medicine<br>Goldenberg, Joshua; National University of Natural Medicine<br>Leach, Matthew; Southern Cross University, National Centre for Naturopathic Medicine<br>Harnett, Joanna; The University of Sydney, School of Pharmacy, Faculty of Medicine and Health<br>Van de Venter, Claudine; University of Technology Sydney<br>McLintock, Andy; University of Technology Sydney, Australian Research Centre in Complementary and Integrative Medicine (ARCCIM)<br>Bradley, Ryan; National University of Natural Medicine; National University of Natural Medicine<br>Hawrelak, Jason; University of Tasmania<br>Cooley, Kieran; Canadian College of Naturopathic Medicine, Research<br>Leung, Brenda; University of Lethbridge<br>Adams, Jon; University of Technology Sydney, Faculty of Health<br>Wardle, Jon; Southern Cross University |
| <b>Primary Subject Heading</b>: | Complementary medicine                                                                                                                                                                                                                                                                                                                                                                                                                                                                                                                                                                                                                                                                                                                                                                                                                                                                                                                                                                                                                                                                                                                                                                                        |
| Secondary Subject Heading:      | Health services research                                                                                                                                                                                                                                                                                                                                                                                                                                                                                                                                                                                                                                                                                                                                                                                                                                                                                                                                                                                                                                                                                                                                                                                      |
| Keywords:                       | COMPLEMENTARY MEDICINE, PRIMARY CARE, Human resource management < HEALTH SERVICES ADMINISTRATION & MANAGEMENT, EPIDEMIOLOGY                                                                                                                                                                                                                                                                                                                                                                                                                                                                                                                                                                                                                                                                                                                                                                                                                                                                                                                                                                                                                                                                                   |
|                                 |                                                                                                                                                                                                                                                                                                                                                                                                                                                                                                                                                                                                                                                                                                                                                                                                                                                                                                                                                                                                                                                                                                                                                                                                               |

SCHOLARONE™  
Manuscripts



I, the Submitting Author has the right to grant and does grant on behalf of all authors of the Work (as defined in the below author licence), an exclusive licence and/or a non-exclusive licence for contributions from authors who are: i) UK Crown employees; ii) where BMJ has agreed a CC-BY licence shall apply, and/or iii) in accordance with the terms applicable for US Federal Government officers or employees acting as part of their official duties; on a worldwide, perpetual, irrevocable, royalty-free basis to BMJ Publishing Group Ltd ("BMJ") its licensees and where the relevant Journal is co-owned by BMJ to the co-owners of the Journal, to publish the Work in this journal and any other BMJ products and to exploit all rights, as set out in our [licence](#).

The Submitting Author accepts and understands that any supply made under these terms is made by BMJ to the Submitting Author unless you are acting as an employee on behalf of your employer or a postgraduate student of an affiliated institution which is paying any applicable article publishing charge ("APC") for Open Access articles. Where the Submitting Author wishes to make the Work available on an Open Access basis (and intends to pay the relevant APC), the terms of reuse of such Open Access shall be governed by a Creative Commons licence – details of these licences and which [Creative Commons](#) licence will apply to this Work are set out in our licence referred to above.

Other than as permitted in any relevant BMJ Author's Self Archiving Policies, I confirm this Work has not been accepted for publication elsewhere, is not being considered for publication elsewhere and does not duplicate material already published. I confirm all authors consent to publication of this Work and authorise the granting of this licence.

# INTERNATIONAL PREVALENCE OF CONSULTATION WITH A NATUROPATHIC PRACTITIONER: A SYSTEMATIC REVIEW AND META-ANALYSIS

Authors:

Steel, Amie<sup>1</sup>

Redmond, Rebecca<sup>1</sup>

Schloss, Janet<sup>1,3</sup>

Cramer, Holger<sup>1,2,3P2</sup>

Goldenberg, Joshua<sup>1,4</sup>

Leach, Matthew<sup>1,3</sup>

Harnett, Joanna<sup>1,5</sup>

Van de Venter, Claudine<sup>1</sup>

McLintock, Andy<sup>1</sup>

Bradley, Ryan<sup>1,3,4,6</sup>

Hawrelak, Jason<sup>1,7</sup>

Cooley, Kieran<sup>1,8</sup>

Leung, Brenda<sup>1,9</sup>

Adams, Jon<sup>1</sup>

Wardle, Jon<sup>1,3</sup>

<sup>1</sup>University of Technology Sydney, Faculty of Health, Australian Research Centre in Complementary and Integrative Medicine, Ultimo NSW Australia

<sup>2</sup>Department of Internal and Integrative Medicine, Evang. Kliniken Essen-Mitte, Faculty of Medicine, University of Duisburg-Essen, Germany

<sup>3</sup>Southern Cross University, National Centre for Naturopathic Medicine, Lismore, Australia

<sup>4</sup>Helfgott Research Institute, National University of Natural Medicine, Portland, OR, USA

<sup>5</sup>Faculty of Medicine and Health, Sydney Pharmacy School, The University of Sydney, Sydney, Australia

<sup>6</sup>Herbert Wertheim School of Public Health and Human Longevity Science, University of California, San Diego, La Jolla, CA, USA

<sup>7</sup>College of Health and Medicine, University of Tasmania, Hobart, TAS, Australia

<sup>8</sup>Canadian College of Naturopathic Medicine, Toronto, ON, Canada

<sup>9</sup>Faculty of Health Sciences, University of Lethbridge, Lethbridge, AB, Canada

## Corresponding author:

Dr Amie Steel

[Amie.steel@uts.edu.au](mailto:Amie.steel@uts.edu.au)



1  
2  
3  
4  
5  
6  
7  
8  
9  
10  
11  
12  
13  
14  
15  
16  
17  
18  
19  
20  
21  
22  
23  
24  
25  
26  
27  
28  
29  
30  
31  
32  
33  
34  
35  
36  
37  
38  
39  
40  
41  
42  
43  
44  
45  
46  
47  
48  
49  
50  
51  
52  
53  
54  
55  
56  
57  
58  
59  
60

## ABSTRACT (300 words)

**Objectives:** Naturopathy is a traditional medicine system informed by codified philosophies and principles, and an emphasis on non-pharmacologic therapeutic interventions. While naturopathy is practiced by approximately 75 000 to 100 000 naturopathic practitioners in at least 98 countries, little is known about the international prevalence of history of consultation with a naturopathic practitioner. This study reports a systematic review and meta-analysis of studies describing the global prevalence of history of consultation with a naturopathic practitioner by the general population.

**Setting:** The included literature was identified through a systematic search of eight databases between September and October 2019, as well as the grey literature.

**Participants:** Studies were included if they reported the prevalence rate of consultations with a naturopathic practitioner by the general population

**Interventions:** Survey items needed to report consultations with a naturopathic practitioner as defined in the country where data was collected, and not combine naturopathic consultations with other health services or only report consultations for illness populations.

**Primary and secondary outcome measures:** Primary measures used for the analysis was consultations in the previous 12-months. Other prevalence timeframes were reported as secondary measures.

**Methods:** Meta-analysis of prevalence data was conducted using random effects models based on individual countries and World Health Organisation (WHO) world regions.

**Results:** The literature search identified eight manuscripts summarizing 14 studies reporting prevalence for inclusion in the review. All included studies had a low risk of bias. Meta-analysis of the included studies by world region found the 12-month prevalence of history of naturopathy consultations ranged from 1% in the Region of the Americas to 6% in the European and Western Pacific Regions.

**Conclusions:** There are up to 6-fold differences in the prevalence of naturopathy consults over 12-months between and within world regions, which may be driven by a range of policy, legislative and social factors.

## STRENGTHS AND LIMITATIONS OF THIS STUDY

- Naturopathy is one of the most commonly used traditional and complementary medicines in the Western world and this is the first systematic review and meta-analysis reporting the prevalence of consultations with a naturopathic practitioner.
- This study only includes data published after 2010 to ensure the results are contemporary, however this may have excluded some studies in countries with older data.
- The included studies were all determined to have a low risk of bias
- The results are limited by the poor availability of data reporting consultations with a naturopathic practitioner, including in countries where a large number of naturopathic practitioners are known to provide care.

## INTRODUCTION

Naturopathy is a traditional medicine system underpinned by six philosophical principles (see Table 1), which were codified by the profession in the 20<sup>th</sup> century [1]. These philosophical principles characterize naturopathic practice and are globally accepted by the profession [2]. Other defining tenets of naturopathic practice are patient-centeredness and individualization, with naturopaths typically drawing upon a range of therapeutic interventions (e.g., diet and lifestyle counselling, herbal medicine, nutritional supplementation, manual therapies, and mind-body practices) to best meet the health care needs and preferences of the patient [3]. Globally, naturopathy is practiced in at least 98 countries with representation in every world region [4]. Naturopathy is practiced widely in Europe (n=54 practicing countries), followed by Latin America (n=51), Africa (n=47), and the Western Pacific (n=37) [4]. Estimates from the World Naturopathic Federation suggest there are between 75,000 and 100,000 naturopaths currently in clinical practice across the world [5].

Training of the naturopathic workforce is currently provided by an estimated 90 education institutions globally, with entry-level qualifications ranging from technical diploma to clinical doctorate [3]. The curriculum of these naturopathic programs typically includes content in health sciences (e.g., anatomy, physiology, chemistry, and biochemistry), clinical sciences (e.g. clinical examination, differential diagnosis), social sciences (e.g. psychology, counselling), and naturopathic sciences (e.g. nutritional medicine, herbal medicine, lifestyle medicine, dietary modification, homeopathy, and manual therapies) [2]. Despite similarities in the content of these training programs, naturopathic scope of practice varies considerably across jurisdictions due to differences in regulation and legislative requirements ranging from voluntary certification, co-regulation, negative licensing, and statutory registration/occupational licensing, as seen in Table 2 [6].

In response to an increase in the use of traditional and complementary medicine (including the utilization of naturopathic health services), the World Health Organisation has developed global strategies to ensure access to safe and effective healthcare, which include promoting the integration of traditional and complementary therapies (including naturopathy) into healthcare systems [7]. Several international research studies suggest the demand for naturopathic services may be attributed to personal healthcare beliefs, dissatisfaction with biomedical care, increased disease severity, and unmet healthcare needs [8-15]. Nevertheless, the global use of naturopathic services is not well understood. Therefore the aim of this study was to describe the prevalence of a history of consultations with naturopathic practitioners globally, including potential differences across world regions.

## METHODS

### AIM

This study aims to describe the global prevalence of a history of consultation with a naturopathic practitioner by the general population.

### STUDY DESIGN

1  
2  
3 A systematic review and meta-analysis of prevalence studies were undertaken in accordance with the AMSTAR  
4 2 guidelines [16]. The protocol for this review was submitted to PROSPERO on the 2<sup>nd</sup> September, 2019 and was  
5 registered on the 28<sup>th</sup> April, 2020 [CRD42020145529].  
6  
7

#### 8 INCLUSION AND EXCLUSION CRITERIA 9

10 Articles were included that reported original data from cohort studies, cross-sectional studies, survey research,  
11 case-control studies, prevalence studies, or epidemiologic studies. Studies reporting on the general population  
12 prevalence of consultations with a naturopathic practitioner either in the previous 12 months or over the user's  
13 lifetime were considered for inclusion. All relevant papers were included irrespective of language of publication  
14 or risk of bias score. Articles were excluded that presented results from specific sub-patient populations (e.g.  
15 children, female or male specific, age limitations, illness populations). Studies were also excluded if they only  
16 presented the prevalence of consultations with other health professionals that may use treatments commonly  
17 associated with naturopathy (e.g. herbal medicine, hydrotherapy, yoga, etc) but were not explicitly named as  
18 naturopathic practitioners, or where naturopathic consultation rates were conflated with a cumulative group of  
19 health services (such as complementary and alternative medicine [CAM]). To ensure the analysis reflected  
20 contemporary patterns of use, studies were excluded if they were published before 2010.  
21  
22  
23  
24  
25  
26  
27

#### 28 SEARCH STRATEGY 29

30 A systematic electronic search of the following databases was conducted between 6<sup>th</sup> September and 2<sup>nd</sup>  
31 October 2019: MEDLINE, AMED, EMBASE, CINAHL, Global Health, WHO Iris, PROQUEST dissertations database,  
32 and Lilac. The complete search strategy for MEDLINE, using Medical Subject Headings (MeSH) terms where  
33 appropriate, is presented in Table 3. A search for grey literature was also performed. The search targeted  
34 countries where, according to the WHO Global Report on Traditional and Complementary Medicine (2019) [17],  
35 naturopathic practitioners provide care to the community. The search was performed using the Google search  
36 engine and the terms *prevalence, use, naturopathy, report*, and the country name.  
37  
38  
39  
40

#### 41 ARTICLE IDENTIFICATION AND SELECTION 42

43 A list of all citations identified through the search were exported from each database by AM and uploaded to  
44 Covidence [18] for filtering and selection. Initial screening of title and abstracts against the inclusion/exclusion  
45 criteria was conducted by AM. Two members of the authorship team (AM and AS) then independently reviewed  
46 the full text of the remaining citations to determine their suitability against the same criteria. Any differences  
47 were resolved through discussion between both reviewing authors. The list of bibliographic references and  
48 subsequent citations (identified through Google Scholar) of included papers were also checked by AS to identify  
49 additional articles otherwise missed through the database search. JHar and JS extracted data from the included  
50 papers. AS and JS assessed the papers for quality of reporting against the STROBE checklist [19]; risk of bias was  
51 assessed using the tool developed by Hoy et al [20] by JG and JAH. Differences in scoring for both tools were  
52 resolved through discussion until consensus was achieved.  
53  
54  
55  
56  
57  
58

#### 59 ANALYSIS 60

1  
2  
3 The results were grouped for narrative presentation of results in accordance with the World Health Organisation  
4 (WHO) world regions [21]. Where studies reported the results of more than one year, these were treated as  
5 different studies in the analysis. Articles with unclear numerators or denominators were calculated by the  
6 research team where the necessary information was provided or checked against source documents for the  
7 same study. Authors were contacted to verify information not able to be determined through these other  
8 methods.  
9

10  
11  
12  
13 Prevalence rates and standard errors were calculated using a standardized Microsoft Excel (version 12.3.5,  
14 Microsoft, Redmond, USA) spreadsheet [22]. Review Manager software (version 5.3, Nordic Cochrane Centre,  
15 Copenhagen, Denmark) was used to conduct the meta-analysis, using random effects models by the Generic  
16 Inverse Variance method. Weighted prevalence rates with 95% confidence intervals (95% CI) were calculated  
17 for 12-month prevalence and lifetime prevalence separately. Separate analyses were conducted for a) country  
18 of origin and b) WHO world regions.  
19

20  
21  
22  
23 Heterogeneity between studies was estimated on the basis of the raw proportions, by using the  $I^2$  statistic.  
24 Intervals were defined as per published guidance [23, 24]: low heterogeneity ( $I^2$  of 0–24%); moderate  
25 heterogeneity ( $I^2$  of 25–49%); substantial heterogeneity ( $I^2$  of 50–74%); relevant heterogeneity ( $I^2$  of 75–100%).  
26 In order to assess heterogeneity,  $\chi^2$  tests were conducted with  $p \leq 0.10$  [24]. We intended to perform sensitivity  
27 analyses to compare differences between outcomes on all studies to studies with low risk of bias only (defined  
28 as <4 items recorded as 'no' on the Hoy et al tool). However, as all studies were classified as low risk of bias, this  
29 was not possible.  
30  
31  
32

### 33 34 35 ETHICS APPROVAL

36 As this study presents a review and synthesis of published research and does not engage with data collection of  
37 human or animal subjects, it is deemed negligible risk and no ethics approval was required.  
38  
39

## 40 41 RESULTS

### 42 43 SEARCH CHARACTERISTICS

44 The article selection process is presented in Figure 1. The database search identified 13,968 citations including  
45 2,509 duplicates. Of these, 11,374 were excluded through title and abstract screening. The full text of the  
46 remaining 85 articles were assessed for eligibility, of which 78 were excluded for the following reasons: not  
47 reporting naturopathic consultations (n=54), conference abstract only (n=9), not original research (n=7), wrong  
48 outcomes reported (n=5), overlooked duplicate (n=2), and wrong study design (n=1) (full list of excluded studies  
49 available in Supplementary File 1). This resulted in seven articles being retained. A search for grey literature  
50 using the Google search engine was also performed, and targeted countries where, according to the WHO Global  
51 Report on Traditional and Complementary Medicine (2019) [4], naturopaths/naturopathic doctors are providing  
52 care to the community. The reference lists and subsequent citations of the remaining articles were checked and  
53 when combined with the results of the Google Search, resulted in identification of an additional 19 articles (3  
54  
55  
56  
57  
58  
59  
60

1  
2  
3 references and 16 citations), of which one report was found to meet the inclusion criteria for this review. This  
4 yielded a total of eight included studies, one of which was published in a report.  
5  
6

#### 7 STUDY CHARACTERISTICS

8  
9 The included studies reporting 12-month prevalence of naturopathy use in a national population were  
10 represented across four of the six WHO world regions: European (n=2) [25, 26], Eastern Mediterranean (n=1)  
11 [27], Region of the Americas (n=3) [28-30], and the Western Pacific (n=1) [31] (see Table 4). One of the studies  
12 from Canada presented the lifetime prevalence of naturopathy use [30], and an additional study from India  
13 (South East Asian World region) did not specify the time period during which naturopathy was used [21] (see  
14 Table 5).  
15  
16  
17

18  
19 All included studies sampled the general adult population and reported data from a nationally representative  
20 sample or demonstrated a distribution of economic categories, except for one study from Israel whereby the  
21 majority of participants' subjective economic status was rated as 'very good' or 'good' [27]. Four studies included  
22 prevalence data from more than one time point [26-28, 30], with the earliest data collected in 1993 [27]. Two  
23 papers reported data from the same national cohort study, but from different time points [28, 29]. All studies  
24 included participants from both urban and rural locations.  
25  
26  
27

#### 28 RISK OF BIAS

29  
30 Critical appraisal of the included studies is presented in Table 6. All studies were determined to have a low risk  
31 of bias, except for one study that was suspected of having non-response bias [27]. All but one study [31] had  
32 problematic reporting of the numerator and denominator, however, this was able to be addressed by the  
33 research team by interrogating the provided data or checking source documents from the primary cohort  
34 studies. One study was identified as not having an acceptable case definition [21] as it did not specify the period  
35 of time covering naturopathy use (e.g. previous 12 months or users' lifetime).  
36  
37  
38

39  
40 Assessment of the reporting quality of included studies identified several issues. More than one-half of studies did  
41 not clearly identify the study design in the title [21, 27-31]. None of the included studies provided reasons for  
42 non-participation or provided information about missing data. Four of the included studies did not acknowledge  
43 the limitations of their research. In one case, some of the omissions in reporting may be explained by the nature  
44 of the publication (i.e. grey-literature report rather than a peer-reviewed journal article) [30].  
45  
46  
47  
48

#### 49 SUMMARY OF FINDINGS

50  
51 The 12-month prevalence reported in studies from the European region ranged between 2% in the UK [25] to  
52 7.7% in Switzerland [26]. One study from the Eastern Mediterranean region (i.e. Israel) [27] reported multiple  
53 prevalence rates ranging from 20% in 1993 through to 18% in 2007. Three studies from the Region of the  
54 Americas reported 12-month prevalence rates of naturopathy use between 3% (in 1997) and 5% (in 2016) in  
55 Canada [30], and between 0.25% (in 2002) and 0.4% (in 2015) in the United States [28, 29]. One study from the  
56 Western Pacific region (i.e. Australia) reported a 6.2% prevalence rate [31].  
57  
58  
59  
60

Two studies reported prevalence of naturopathy use over other time periods. One study from the Region of the Americas (Canada) indicated 6% of the general population in 1997, 9% in 2006, and 11% in 2016 used naturopathy at some point in the user's lifetime [30]. A study from the South-East Asian world region indicated 10% of the population had used naturopathy and yoga, but the timeframe of use was not specified [32].

#### META-ANALYSIS RESULTS

The estimated 12-month prevalence rates of naturopathy use for different countries are shown in Figure 2. Prevalence rates significantly differed between countries ( $p < 0.001$ ) and ranged from less than 1% of the population in the USA to 8% in Switzerland. While the primary studies were subject to wide heterogeneity, significant heterogeneity was only found for Canada ( $p = 0.01$ ) and the USA ( $p < 0.001$ ).

Regarding WHO world regions, 12-month prevalence of naturopathy use ranged from 1% in the Region of the Americas to 6% in European and Western Pacific Regions, again with significant differences between regions ( $p < 0.001$ ; Figure 3). Relevant and statistically significant heterogeneity was present in studies involving the European Region ( $p < 0.001$ ), and Region of the Americas ( $p < 0.001$ ).

Since all studies were classified as having low risk of bias, no sensitivity analyses were conducted. No meta-analysis could be performed on studies reporting prevalence of naturopathy use over other time periods due to the paucity and heterogeneity of studies reporting this outcome.

#### DISCUSSION

This review presents the most recent synthesis of evidence of the global prevalence of consultations with naturopaths/naturopathic doctors. The prevalence of naturopathy/naturopathic medicine use was reported in seven countries, across five WHO designated regions of the world. However, it should also be acknowledged that data were only available for a small number of countries in each world region. Intra-region variability limits the overall generalisability of such findings to the relevant region and, as such, aggregate regional results should be interpreted with caution. Of the regions reporting 12-month prevalence rates, the highest was in the Eastern Mediterranean region (Israel), with 18% (2007) to 20% (1993) of the general population seeking the services of a naturopath/naturopathic doctor. The lowest reported 12-month prevalence of naturopathy use was observed in the Americas (USA), with a rate of 0.4% (2012). Lifetime prevalence of use was reported in two countries: Canada (6% in 1997 to 11% in 2016); and India (7% rural, 12% urban in 2011/12). Where more than one timeframe of data was available, there was a relative amount of consistency across time suggesting naturopathy/naturopathic medicine use is temporally stable in these countries.

The wide range in the rates of consultation with a naturopath/naturopathic doctor may reflect differences in the perception and availability of naturopathy in specific countries. For example, while national prevalence of consultations with naturopaths in the USA is relatively low, this may obscure significant heterogeneity within that region. For example, insurance data from Washington state shows prevalence of naturopathic consultation to be four times higher than the national prevalence (1.6% v 0.4%) [33]. Such heterogeneity may be similarly observed in other regions and may be due to several factors. In the USA recognition of the naturopathic

1  
2  
3 profession through licensure is not uniformly applied across that nation [33], and distribution of the  
4 naturopathic workforce has historically been determined by the proximity to naturopathic educational  
5 institutions [34]. Insurance coverage is also known to be a significant driver of naturopathic use [35], and variable  
6 insurance coverage arrangements for naturopathy – as observed in the USA [36] – may also result in regional  
7 differences. Further attention towards regional variations and heterogeneity, particularly as it relates to specific  
8 barriers and facilitators to appropriate utilization of naturopathic services - is warranted.  
9  
10

11  
12  
13 The wide range in rates of naturopathy use may also reflect differences in scope of practice in each world region.  
14 For example, in the USA, naturopathic physicians are considered to bridge conventional medicine and CAM  
15 modalities [37], while in Germany, naturopathic practitioners known as “Heilpraktiker” are a distinct category  
16 and reportedly have inconsistent training and clinical abilities [38]. As such, the term naturopathy may be  
17 differentially classifying practitioners due to professionalization, resulting in an underestimate of use in some  
18 countries and overestimate in others. Further consideration of the implications associated with the inconsistent  
19 ‘protection’ of professional titles and defined scopes of practice for naturopaths/naturopathic doctors by  
20 country is likely to influence the prevalence of use by the public [2].  
21  
22  
23  
24  
25

26 Prevalence data from some countries may also be impacted by definitional difficulties or confusion around the  
27 term ‘naturopathy’. For example, naturopathy is often grouped under a broader nomenclature as one of the  
28 many modalities or therapies considered ‘complementary approaches to healthcare’ [39] or “integrative  
29 medicine” and thus may not be individually represented in the publications included in our analysis. Multiple  
30 practitioner types may also present difficulties for data collection. For example, a review of CAM services in  
31 Europe, of the (22,300) practitioners of naturopathy, 15,000 were identified as (mostly German) medical doctors  
32 [40]. Thus, patients may not identify obtaining naturopathy as a service per se, but as part of the standard care  
33 they receive from a medical doctor who integrates naturopathic principles or modalities into their practice. This  
34 may be one reason why three of the largest European countries by naturopathic workforce (Germany, Portugal  
35 and Spain [2]) were not represented in this review. Thus, the true prevalence of naturopathic consultations is  
36 likely under-reported. Further, an examination of government administered national health surveys of the  
37 general population in the countries represented by WNF member organisations, found only Switzerland,  
38 Northern Ireland, USA, Mexico and India currently included items that specifically measured consultations with  
39 a naturopath/naturopathic doctor (see Supplementary File 2 and Figure 4). While some non-government  
40 research has undertaken to measure the prevalence of naturopathy use in additional countries, available data  
41 is not available in more than 90% of countries with WNF member organisations, and 95% of all countries  
42 reported by the WHO as having a naturopathic profession. To evaluate the potential role of naturopaths in care  
43 delivery, it is imperative that naturopathic health services and workforce research data is captured in all  
44 countries where there is a significant naturopathic presence.  
45  
46  
47  
48  
49  
50  
51  
52  
53  
54  
55

56 Furthermore, although naturopathic practice is relatively consistent globally, local, and regional variations in  
57 preferred therapies may result in point-of-service differences that may impact prevalence of naturopathic  
58 consultations in those countries. For example, in the United Kingdom, historical connections between  
59  
60



1  
2  
3 osteopathy and naturopathy may drive naturopathic use for musculoskeletal conditions in that country more  
4 than in countries like Australia, where naturopathy and herbalism have had a larger shared history and  
5 connection [41]. Some studies in this review explicitly combined queries about naturopathic utilization with  
6 other CAM practices – for example, herbalism and naturopathy in the Australian study. Thus, it is important that  
7 a reliable validated instrument is developed for collecting more specific data about naturopathic service  
8 utilization within and across countries to establish ‘true’ prevalence of use information.  
9  
10

11  
12  
13 While prevalence data provides a snapshot of a given populations’ use of naturopathy, less is known about the  
14 factors associated with that use. For example, factors that have previously been raised as impacting the use of  
15 naturopathy/naturopathic medicine, include licensure and regulation, scope of practice, training of new  
16 students and therefore number of naturopaths/naturopathic doctors in the workforce, or country specific  
17 health systems that influence the support and reimbursements of naturopathic services (e.g. insurance vs out  
18 of pocket) [42]. By focusing on general population utilization, this study may also not reflect differences in  
19 prevalence of use for different clinical conditions. For example, Australian studies published before 2010 show  
20 a self-reported prevalence of naturopathic use among the general population of mid-aged women to be 8.7%,  
21 while rates for cancer (15.7%) and depression (22.2%) were significantly higher [9]. Similar variations were seen  
22 in insurance data from Washington state in the US, where 7.1% of insured cancer patients made claims for  
23 naturopathic treatment, compared to 1.6% of general enrollees [33]. With this in mind, future research should  
24 more closely examine the characteristics of users of naturopathy in different countries and world regions both  
25 for the general population and within subpopulations.  
26  
27  
28  
29  
30  
31  
32

33  
34 One of the limitations of prevalence studies in the context of naturopathy, is they fail to capture the breadth of  
35 treatments that is unique to naturopathy and they do not capture data associated with the quality of care, role  
36 within healthcare systems, nor the efficacy and safety of naturopathic approaches to the management of specific  
37 conditions [43]. Thus, research into the quality, safety, efficacy, and cost effectiveness of  
38 naturopathy/naturopathic medicine would provide pragmatic understanding about the contribution of  
39 naturopathy to healthcare within populations and more broadly across the world. Additionally, although limiting  
40 data collection to studies published after 2010 helps to ensure prevalence data most accurately reflects  
41 contemporary utilization, such time limits may have excluded some studies in regions that were missing from  
42 the review. Additionally, observing changes in prevalence of naturopathic consultations over time may also be  
43 able to offer insights into the changing role of naturopathy/naturopathic medicine in relation to health systems  
44 changes or generational health needs [44].  
45  
46  
47  
48  
49  
50

## 51 CONCLUSION

52  
53 Although the naturopathic workforce has a significant presence globally, there is limited detailed data on the  
54 prevalence of naturopathic consultations. As such, there is a need for a reliable validated instrument to be  
55 developed for collecting more specific data about naturopathic service utilization within and across countries.  
56 Nevertheless, current evidence reports a 12-month prevalence of naturopathy use ranging from 1% in the  
57 Region of the Americas to 6% in European and Western Pacific Regions, though there are significant differences  
58  
59  
60

between and within world regions. Differences in naturopathic utilization in these regions may be indicative of a range of policy, legislative and social factors impacting the naturopathic profession. Despite these ongoing factors, further research attention is warranted to develop evidence-based responses to the World Health Organisation recommendation that naturopathy and other traditional medicines be integrated, where appropriate, into healthcare systems so that consumers have access to safe and effective multi-disciplinary care.

#### References

1. Snider, P. and J. Zeff, *Unifying Principles of Naturopathic Medicine Origins and Definitions*. Integrative Medicine: A Clinician's Journal, 2019. **18**(4): p. 36.
2. World Naturopathic Federation Roots Committee, *WNF - Naturopathic Roots Report*. 2016, World Naturopathic Federation,: Toronto, Canada.
3. Dunn, J., et al., *Characteristics of global naturopathic education, regulation, and practice frameworks: results from an international survey*. BMC complementary medicine and therapies, 2021. **21**(1): p. 1-19.
4. World Health Organisation. *WHO Global Report on Traditional and Complementary Medicine 2019*. 2019; Available from: <https://bit.ly/3Ev6yPq>.
5. World Naturopathic Federation, *2016 Naturopathic Numbers Report*. 2016, World Naturopathic Federation: Canada.
6. Lloyd, I., J. Dunn, and J. Wardle, *Regulation of the Naturopathic Workforce*, in *Naturopathy: Practice, Effectiveness, Economics, Safety*, I. Lloyd, A. Steel, and J. Wardle, Editors. 2021, World Naturopathic Federation: Toronto, Canada. p. 28-57.
7. Smith, M., A. Burton, and T. Falkenberg, *World Health Organization Traditional Medicine Strategy 2014–2023*. New strategy for traditional and complementary medicine includes the development and use of herbal medicinal preparations. HerbalEGram, 2014. **11**(5).
8. Leach, M.J., *Profile of the complementary and alternative medicine workforce across Australia, New Zealand, Canada, United States and United Kingdom*. Complementary therapies in medicine, 2013. **21**(4): p. 364-378.
9. Reid, R., et al., *Complementary medicine use by the Australian population: a critical mixed studies systematic review of utilisation, perceptions and factors associated with use*. BMC Complementary and Alternative Medicine, 2016. **16**(1): p. 176.
10. Leach, M.J., *Determinants of Complementary Medicine Service Utilization in a Regional South Australian Population: A Cross-Sectional Study*. The Journal of Rural Health, 2021. **37**(1): p. 69-80.
11. Bradley, R., et al., *Survey of CAM interest, self-care, and satisfaction with health care for type 2 diabetes at group health cooperative*. BMC complementary and alternative medicine, 2011. **11**(1): p. 121.
12. Foley, H. and A. Steel, *Patient perceptions of clinical care in complementary medicine: A systematic review of the consultation experience*. Patient Educ Couns, 2016. **100**: p. 212-23.
13. Foley, H., A. Steel, and J. Adams, *Perceptions of Person-Centred Care Amongst Individuals with Chronic Conditions who Consult Complementary Medicine Practitioners*. Complementary Therapies in Medicine, 2020: p. 102518.
14. Foley, H., A. Steel, and J. Adams, *Consultation with complementary medicine practitioners by individuals with chronic conditions: Characteristics and reasons for consultation in Australian clinical settings*. Health & social care in the community, 2020.
15. Legenne, M., et al., *Perception of naturopathy for female patients with metastatic gynecological cancer: A qualitative study*. Palliative & supportive care, 2015. **13**(6): p. 1663-1668.
16. Shea, B.J., et al., *AMSTAR 2: a critical appraisal tool for systematic reviews that include randomised or non-randomised studies of healthcare interventions, or both*. bmj, 2017. **358**.
17. World Health Organization, *WHO global report on traditional and complementary medicine 2019*, in *WHO global report on traditional and complementary medicine 2019*. 2019.
18. Veritas Health Innovation, *Covidence systematic review software*. Melbourne, Australia.

19. Knottnerus, A. and P. Tugwell, *STROBE--a checklist to Strengthen the Reporting of Observational Studies in Epidemiology*. Journal of clinical epidemiology, 2008. **61**(4): p. 323.
20. Hoy D, et al. A systematic review of the global prevalence of low back pain. Arthritis & Rheumatism, 2012. **64**(6): p. 2028-37.
21. World Health Organization. WHO Regional Offices Geneva, Switzerland, 2022 [Available from: <https://www.who.int/about/who-we-are/regional-offices>].
22. Neyeloff, J.L., S.C. Fuchs, and L.B. Moreira, *Meta-analyses and Forest plots using a microsoft excel spreadsheet: step-by-step guide focusing on descriptive data analysis*. BMC research notes, 2012. **5**(1): p. 1-6.
23. Higgins, J.P., et al., *Measuring inconsistency in meta-analyses*. Bmj, 2003. **327**(7414): p. 557-560.
24. Higgins, J.P., et al., *Cochrane handbook for systematic reviews of interventions*. 2019: John Wiley & Sons.
25. Hunt, K.J., et al., *Complementary and alternative medicine use in England: Results from a national survey*. International Journal of Clinical Practice, 2010. **64**(11): p. 1496-1502.
26. Klein, S.D., et al., *Usage of complementary medicine in Switzerland: Results of the Swiss health survey 2012 and development since 2007*. PLoS ONE, 2015. **10**(10): p. no pagination.
27. Shmueli, A., I. Igudin, and J. Shuval, *Change and stability: use of complementary and alternative medicine in Israel: 1993, 2000 and 2007*. European Journal of Public Health, 2011. **21**(2): p. 254-259.
28. Su, D. and L. Li, *Trends in the use of complementary and alternative medicine in the United States: 2002-2007*. Journal of Health Care for the Poor and Underserved, 2011. **22**(1): p. 296-310.
29. Clarke, T.C., et al., *Trends in the use of complementary health approaches among adults: United States, 2002-2012*. National health statistics reports, 2015(79): p. 1-16.
30. Esmail, N., *Complementary and Alternative Medicine*. 2017: Fraser Institute.
31. McIntyre, E., et al., *Consultations with Naturopaths and Western Herbalists: Prevalence of Use and Characteristics of Users in Australia*. The Journal of Alternative Complementary Medicine, 2019. **25**(2).
32. Srinivasan R., Sugumar V.R., Spread of traditional medicines in India: Results of national sample survey organization's perception survey on use of Ayush. Journal of Evidence-based Complementary & Alternative Medicine, 2017. **22**(2): p. 194-204.
33. Lafferty, W.E., et al., *The use of complementary and alternative medical providers by insured cancer patients in Washington State*. Cancer, 2004. **100**(7): p. 1522-30.
34. Fleming, S.A. and N.C. Gutknecht, *Naturopathy and the primary care practice*. Primary Care: Clinics in Office Practice, 2010. **37**(1): p. 119-136.
35. Albert, D.P. and F.B. Butar, *Distribution, concentration, and health care implications of naturopathic physicians in the United States*. Complementary health practice review, 2004. **9**(2): p. 103-117.
36. Whedon, J., et al., *Insurance reimbursement for complementary healthcare services*. The Journal of Alternative and Complementary Medicine, 2017. **23**(4): p. 264-267.
37. Litchy, A.P., *Naturopathic physicians: holistic primary care and integrative medicine specialists*. Journal of dietary supplements, 2011. **8**(4): p. 369-377.
38. Heudorf, U., A. Carstens, and M. Exner, *Naturopathic practitioners and the public health system. Legal principles as well as experience from naturopathic practitioner candidate tests and hygiene inspections of naturopathic practitioner's practices in the Rhine-Main area in 2004-2007*. Bundesgesundheitsblatt, Gesundheitsforschung, Gesundheitsschutz, 2010. **53**(2): p. 245-257.
39. National Center for Complementary and Integrative Health. *Are You Considering a Complementary Health Approach?* 2016 [cited 2021 30 June]; Available from: <https://www.nccih.nih.gov/health/are-you-considering-a-complementary-health-approach>.
40. von Ammon, K., et al., *Complementary and alternative medicine provision in Europe--first results approaching reality in an unclear field of practices*. Complementary Medicine Research, 2012. **19**(Suppl. 2): p. 37-43.
41. World Naturopathic Federation, *World Naturopathic Federation Report*. 2015, World Naturopathic Federation: Ontario, Canada.
42. Ooi, S.L., L. McLean, and S.C. Pak, *Naturopathy in Australia: Where are we now? Where are we heading?* Complementary therapies in clinical practice, 2018. **33**: p. 27-35.
43. Myers, S. and V. Vigar, *The State of the Evidence for Whole-System Multi-Modality Naturopathic Medicine: A Systematic Scoping Review*. The Journal of Alternative & Complementary Medicine, 2019. **25**(2).

- 1  
2  
3 44. Steel, A., et al., *Generational differences in complementary medicine use in young Australian women: Repeated cross-sectional dataset analysis from the Australian longitudinal study on women's health*. *Complementary therapies in medicine*, 2019. **43**: p. 66-72.  
4  
5  
6  
7  
8  
9  
10  
11  
12  
13  
14  
15  
16  
17  
18  
19  
20  
21  
22  
23  
24  
25  
26  
27  
28  
29  
30  
31  
32  
33  
34  
35  
36  
37  
38  
39  
40  
41  
42  
43  
44  
45  
46  
47  
48  
49  
50  
51  
52  
53  
54  
55  
56  
57  
58  
59  
60

For peer review only

## AUTHOR CONTRIBUTIONS

AS devised the project, the main conceptual idea and drafted the review protocol. All authors reviewed and edited the protocol prior to registration. Literature searching, removal of duplicates and filtering of citations by title and abstract was undertaken by AM. Full text retrieval and assessment of articles against eligibility criteria was undertaken by AM and AS. Data extraction was completed by JHar. STROBE assessment was completed by CVV, JS and AS. Risk of bias assessment was completed by JG, JHaw and AS. Meta-analysis was completed by JG, KC and HC. The method section of the manuscript was drafted by HC, AS, JS and JHaw. The results were drafted by AS and HC. The discussion was drafted by JHar, JW, JA and BL. The introduction was drafted by RR, ML, and RB. All authors reviewed and edited the full draft of the manuscript prior to submission.

## COMPETING INTERESTS

The authors have no competing interests to declare.

## FUNDING

This research received no specific grant from any funding agency in the public, commercial or not-for-profit sectors.

## PATIENT AND PUBLIC INVOLVEMENT

No patient involved

## DATA AVAILABILITY

No additional data available

**Table 1.** Philosophical principles of naturopathy [3]

- First do no harm
- Healing power of nature
- Treat the cause
- Treat the whole person
- Disease prevention and health promotion
- Naturopathic practitioner as teacher

For peer review only

**Table 2:** Types of occupational regulation that apply to the naturopathy profession, by WHO Region and Member State (ref: Lloyd I, Dunn J, Wardle J. Regulation of the Naturopathic Workforce. In: Lloyd I, Steel A, Wardle J, editors. Naturopathy: Practice, Effectiveness, Economics, Safety. Toronto, Canada: World Naturopathic Federation; 2021. p. 28-57)

| WHO Region                          | Type of occupational regulation                                                                                                                                                                              |                                                                                                                                              |                                                                                                                                |                                               |                    |                                                                                                                          |                                                                                                  |
|-------------------------------------|--------------------------------------------------------------------------------------------------------------------------------------------------------------------------------------------------------------|----------------------------------------------------------------------------------------------------------------------------------------------|--------------------------------------------------------------------------------------------------------------------------------|-----------------------------------------------|--------------------|--------------------------------------------------------------------------------------------------------------------------|--------------------------------------------------------------------------------------------------|
|                                     | No occupational regulation, licensure or registration identified                                                                                                                                             |                                                                                                                                              | Voluntary Certification                                                                                                        | Co-regulation                                 | Negative licensing | Statutory registration/ occupational licensing                                                                           |                                                                                                  |
| <b>African Region</b>               | Angola, Mauritius                                                                                                                                                                                            | Kenya, Zambia                                                                                                                                | None identified                                                                                                                | None identified                               | None identified    | Botswana, Democratic Republic of the Congo, Ghana, Namibia, Nigeria, South Africa, Swaziland, Tanzania, Uganda, Zimbabwe |                                                                                                  |
| <b>Region of the Americas</b>       | Antigua and Barbuda, Argentina, Barbados, Bolivia, British Virgin Islands, Costa Rica, Dominica Republic, El Salvador, Guatemala, Guyana, Honduras, Mexico, Panama, Saint Martin, and Tobago, Virgin Islands | Barbuda, Bahamas, Belize, British Virgin Islands, Costa Rica, Guatemala, Haiti, Jamaica, Nicaragua, Paraguay, Trinidad and Tobago, Venezuela | Bermuda, Canada <sup>1</sup> , United States of America <sup>1</sup> , Uruguay                                                 | Brazil, United States of America <sup>1</sup> | Brazil             | None identified                                                                                                          | Canada, Chile, Colombia, Cuba, Ecuador, Peru, Puerto Rico, Saint Lucia, United States of America |
| <b>Eastern Mediterranean Region</b> | Bahrain, Kuwait, Egypt, Morocco, Qatar                                                                                                                                                                       | Iran                                                                                                                                         | None identified                                                                                                                | None identified                               | None identified    | Saudi Arabia, United Arab Emirates                                                                                       |                                                                                                  |
| <b>European Region</b>              | Austria, Bosnia and Herzegovina, Hungary, Israel, Luxembourg, Russia, Slovakia, Ukraine                                                                                                                      | Belgium, Czech Republic, Denmark, France, Greece, Ireland, Italy, Norway, Netherlands, Slovenia, Spain, Sweden, United Kingdom               | Belgium, Czech Republic, Denmark, France, Greece, Ireland, Italy, Norway, Netherlands, Slovenia, Spain, Sweden, United Kingdom | Norway, United Kingdom                        | None identified    | Albania, Cyprus, Germany, Iceland, Liechtenstein, Portugal, Romania, Switzerland                                         |                                                                                                  |
| <b>South-East Asia Region</b>       | Indonesia, Thailand                                                                                                                                                                                          | Sri Lanka                                                                                                                                    | None identified                                                                                                                | None identified                               | None identified    | India, Nepal                                                                                                             |                                                                                                  |
| <b>Western Pacific Region</b>       | Cambodia, Japan, Republic of Singapore, Viet Nam                                                                                                                                                             | China, Fiji, Philippines, Republic of Korea, Vanuatu                                                                                         | Australia, Hong Kong, New Zealand                                                                                              | Australia                                     | Australia          | Cook Islands, Malaysia, Samoa                                                                                            |                                                                                                  |

<sup>1</sup> Voluntary certification regimens are present in some provinces (Canada) and States (USA) when occupational licensing or statutory registration is absent.

**Table 3:** Example search terms applied to database searches

1. EXP COMPLEMENTARY THERAPIES/
- 2.((ALTERNATIVE OR COMPLEMENTARY OR INTEGRATIVE) ADJ (MEDICINE OR THERAPY OR THERAPIES)).TW,KW. 3. NATUROPATHY/
4. NATUROPAT\$.AF.
5. HEILPRAKTIKER.AF.
6. 1 OR 2 OR 3 OR 4 OR 5
7. COHORT STUDIES/ OR LONGITUDINAL STUDIES/ OR FOLLOW-UP STUDIES/ OR PROSPECTIVE STUDIES/ OR RETROSPECTIVE STUDIES/ OR COHORT.TI,AB. OR LONGITUDINAL.TI,AB. OR PROSPECTIVE.TI,AB. OR RETROSPECTIVE.TI,AB.
8. CROSS-SECTIONAL STUDIES/ OR PREVALENCE/ OR (CROSS-SECTIONAL OR PREVALENCE OR TRANSVERSAL).TI,AB,KW.
9. (OBSERVATIONAL ADJ (STUDY OR STUDIES)).TW.
10. SURVEY\$.TW.
11. 7 OR 8 OR 9 OR 10
12. 6 AND 11



1  
2  
3  
4  
5  
6  
7  
8  
9  
10  
11  
12  
13  
14  
15  
16  
17  
18  
19  
20  
21  
22  
23  
24  
25  
26  
27  
28  
29  
30  
31  
32  
33  
34  
35  
36  
37  
38  
39  
40  
41  
42  
43  
44  
45  
46  
47  
48  
49  
50  
51  
52  
53  
54  
55  
56  
57  
58  
59  
60

Figure 1: Flow chart representing article selection method in line with PRISMA protocol

ATTACHED

For peer review only

TABLE 4: SUMMARY INFORMATION OF INCLUDED STUDIES REPORTING PREVALENCE OF USE OF NATUROPATHY IN THE PREVIOUS 12 MONTHS

| WHO Region             | Country (WHO Region) | Author                 | Economic status                                                                                               | Design (measure)                                  | Year data collected | Population         | Naturopathy descriptor                  | Setting (e.g. urban, rural)                                          | N                                      | Duration of exposure | Overall use (%)                                          |
|------------------------|----------------------|------------------------|---------------------------------------------------------------------------------------------------------------|---------------------------------------------------|---------------------|--------------------|-----------------------------------------|----------------------------------------------------------------------|----------------------------------------|----------------------|----------------------------------------------------------|
| European               | England              | Hunt et al (2010)      | Nationally representative                                                                                     | National Cohort (survey)                          | 2005                | General population | Naturopathy                             | Both                                                                 | 7630                                   | Previous 12 months   | 2%*                                                      |
|                        | Switzerland          | Klein et al. (2015)    | Nationally representative                                                                                     | National Cohort (survey)                          | 2007, 2012          | General population | Naturopathy                             | Both                                                                 | 2007: 14,432<br>2012: 18,357           | Previous 12 months   | 2007: n=1185; 7.7%<br>2012: n=1597; 7.7%                 |
| Eastern Mediterranean  | Israel               | Shmueli, et al (2010)  | Subjective economic status 'very good' or 'good' range from M=0,49 to M=0.58                                  | cross-sectional (survey)                          | 1993, 2000, 2007    | General population | Naturopathy                             | Urban                                                                | 1993: 2003<br>2000: 2505<br>2007: 752  | Previous 12 months   | 1993: n=400; 20%<br>2000: n=425; 17%<br>2007: n=135; 18% |
| Region of the Americas | Canada               | Esmail (2017)          | Evenly distributed (<\$20 000 - >\$79 999)                                                                    | Cross-sectional (structured telephone interviews) | 1997, 2006, 2016    | General population | Naturopathy                             | National                                                             | 1997: 1500<br>2006: 2000<br>2016: 2000 | Previous 12 months   | 1997: n=45; 3%<br>2006: n=80; 4%<br>2016: N=100; 5%      |
|                        | USA                  | Su and Li (2011)       | Nationally representative                                                                                     | cross-sectional survey (survey)                   | 2002, 2007          | General population | Naturopathy                             | National                                                             | 2002: 30267<br>2007: 20769             | Previous 12 months   | 2002: n=76; 0.25%<br>2007: n=71; 0.34%                   |
|                        |                      | Clarke et al (2015)    | Nationally representative                                                                                     | Cross-sectional (survey)                          | 2012                | General population | Naturopathy                             | National                                                             | 38280                                  | Previous 12 months   | n=153; 0.4%                                              |
| Western Pacific        | Australia            | McIntyre et al. (2019) | Manageability on household income; impossible, difficult all/some of time (58.6%), not too bad / easy (41.4%) | National Cross-sectional (survey)                 | 2017                | General population | Naturopathy and western herbal medicine | Both Urban: 72.6%<br>Inner regional: 18.7%<br>Outer reg/remote: 8.7% | 2019                                   | Previous 12 months   | n=126; 6.2%                                              |

\* Estimated figure based on interpretation of the chart included in the article.

1  
2  
3  
4  
5  
6  
7  
8  
9  
10  
11  
12  
13  
14  
15  
16  
17  
18  
19  
20  
21  
22  
23  
24  
25  
26  
27  
28  
29  
30  
31  
32  
33  
34  
35  
36  
37  
38  
39  
40  
41  
42  
43  
44  
45  
46

TABLE 5: SUMMARY INFORMATION OF INCLUDED STUDIES REPORTING PREVALENCE OF USE OF NATUROPATHY OVER OTHER TIME PERIODS

| WHO Region             | Country (WHO Region) | Author                             | Economic status                                                | Design (measure)         | Year data collected | Population                           | Naturopathy descriptor | Setting (e.g. urban, rural) | N                                            | Duration of exposure | Overall use (%)                                                  |
|------------------------|----------------------|------------------------------------|----------------------------------------------------------------|--------------------------|---------------------|--------------------------------------|------------------------|-----------------------------|----------------------------------------------|----------------------|------------------------------------------------------------------|
| Region of the Americas | Canada               | Esmail (2017)                      | Evenly distributed (<\$20 000 - >\$79 999)                     | Cross-sectional survey   | 1997, 2006, 2016    | General population                   | Naturopathy            | Both                        | 1500 (1997); 2000 (2006); 2000 (2016)        | Ever used            | 1997: 6%<br>2006: 9%<br>2016: 11%                                |
| South-East Asian       | India                | Srinivasan and Raji Sugumar (2017) | Diversity of occupation, social group, education, and religion | Cross-sectional (survey) | 2011-2012           | Households in the general population | Naturopathy and yoga   | Both                        | Total: 65507<br>Urban: 26996<br>Rural: 38511 | Not specified        | Total: n=6616 (10%)<br>Urban: n=3227 (12%)<br>Rural: n=2607 (7%) |

TABLE 6: ASSESSMENT OF RISK OF BIAS AND REPORTING QUALITY FOR INCLUDED STUDIES

| Criteria                                             | Manuscript        |                    |                      |               |                  |                     |                       |                                    |
|------------------------------------------------------|-------------------|--------------------|----------------------|---------------|------------------|---------------------|-----------------------|------------------------------------|
|                                                      | Hunt et al (2010) | Klein et al (2015) | Shmueli et al (2010) | Esmail (2017) | Su and Li (2011) | Clarke et al (2015) | McIntyre et al (2019) | Srinivasan and Raji Sugumar (2017) |
| <b>Risk of Bias</b>                                  |                   |                    |                      |               |                  |                     |                       |                                    |
| 1 – representativeness of target population          | Y                 | Y                  | Y                    | Y             | Y                | Y                   | Y                     | Y                                  |
| 2 – representativeness of sample population          | Y                 | Y                  | Y                    | Y             | Y                | Y                   | Y                     | Y                                  |
| 3 – random selection or census                       | Y                 | Y                  | Y                    | Y             | Y                | Y                   | N                     | Y                                  |
| 4 – non-response bias minimal                        | Y                 | Y                  | N                    | Y             | Y                | Y                   | N                     | Y                                  |
| 5 – data direct from participants                    | Y                 | Y                  | Y                    | Y             | Y                | Y                   | Y                     | Y                                  |
| 6 – acceptable case definition                       | Y                 | Y                  | Y                    | Y             | Y                | Y                   | Y                     | N                                  |
| 7 – reliability and validity of instrument           | N/A               | N/A                | N/A                  | N/A           | N/A              | N/A                 | N/A                   | N/A                                |
| 8 – same mode of data for all subjects               | Y                 | Y                  | Y                    | Y             | Y                | Y                   | Y                     | Y                                  |
| 9 – appropriate length of shortest prevalence period | Y                 | Y                  | Y                    | Y             | Y                | Y                   | Y                     | N                                  |
| 10 – numerator and denominator appropriate           | N                 | N                  | N                    | N             | N                | N                   | Y                     | Y                                  |
| 11 - Summary                                         | Low               | Low                | Low                  | Low           | Low              | Low                 | Low                   | Low                                |
| <b>Reporting Quality</b>                             |                   |                    |                      |               |                  |                     |                       |                                    |
| Title and abstract                                   |                   |                    |                      |               |                  |                     |                       |                                    |
| 1a – Title                                           | Y                 | Y                  | N                    | N             | N                | N                   | N                     | Y                                  |
| 1b - Abstract                                        | Y                 | Y                  | Y                    | Y             | N                | N                   | Y                     | N                                  |
| Introduction                                         |                   |                    |                      |               |                  |                     |                       |                                    |
| 2 - Background/rationale                             | Y                 | Y                  | Y                    | Y             | Y                | Y                   | Y                     | Y                                  |
| 3 - Objectives                                       | Y                 | Y                  | Y                    | Y             | Y                | Y                   | Y                     | Y                                  |
| Methods                                              |                   |                    |                      |               |                  |                     |                       |                                    |
| 4 - Study design                                     | Y                 | Y                  | Y                    | Y             | Y                | Y                   | Y                     | Y                                  |
| 5 - Setting                                          | Y                 | Y                  | Y                    | Y             | Y                | Y                   | Y                     | Y                                  |
| 6 - Participants                                     | Y                 | Y                  | Y                    | Y             | Y                | Y                   | Y                     | Y                                  |
| 7 - Variables                                        | Y                 | Y                  | Y                    | N             | N                | Y                   | Y                     | N                                  |
| 8 - Data sources/measurement                         | Y                 | Y                  | Y                    | N             | Y                | Y                   | Y                     | Y                                  |
| 9 - Bias                                             | Y                 | Y                  | Y                    | Y             | Y                | Y                   | Y                     | N                                  |
| 10 - Study size                                      | Y                 | Y                  | Y                    | Y             | N                | N                   | Y                     | Y                                  |
| 11 - Quantitative variables                          | Y                 | Y                  | Y                    | N             | N                | Y                   | Y                     | N                                  |
| 12a – All statistical methods                        | Y                 | Y                  | N                    | N             | Y                | Y                   | Y                     | N                                  |
| 12b – Subgroups and interactions                     | N/A               | N/A                | N/A                  | Y             | Y                | Y                   | Y                     | Y                                  |
| 12c – Missing data                                   | N                 | Y                  | N                    | N             | N                | N                   | N                     | N                                  |

|                   |                                                           |     |     |     |     |     |     |     |     |
|-------------------|-----------------------------------------------------------|-----|-----|-----|-----|-----|-----|-----|-----|
|                   | <i>12d – Analysis accounting for sampling</i>             | N/A | N/A | Y   | N   | Y   | Y   | Y   | N   |
|                   | <i>12e – Any sensitivity analysis</i>                     | N/A |
| Results           |                                                           |     |     |     |     |     |     |     |     |
|                   | <i>13a – Numbers of participants</i>                      | Y   | Y   | Y   | Y   | N   | N   | Y   | N   |
|                   | <i>13b – Reasons for nonparticipation</i>                 | N   | N   | N   | N   | N   | N   | N   | N   |
|                   | <i>13c – flow diagram</i>                                 | N   | N   | N   | N   | N   | N   | N   | N   |
|                   | <i>14a – Characteristics of study participants</i>        | Y   | Y   | N   | Y   | N   | Y   | Y   | Y   |
|                   | <i>14b – Participants with missing data</i>               | N   | N   | N   | N   | N   | N   | N   | N   |
|                   | <i>15 - Outcome data</i>                                  | N   | Y   | Y   | Y   | Y   | Y   | Y   | Y   |
|                   | <i>16a – Unadjusted and applicable adjusted estimates</i> | Y   | Y   | Y   | Y   | Y   | Y   | Y   | Y   |
|                   | <i>16b – Report category boundaries</i>                   | ?   | Y   | N/A | N   | N/A | N/A | Y   | N/A |
|                   | <i>16c –Estimates of absolute risk</i>                    | N/A |
|                   | <i>17 - Other analyses</i>                                | N/A | N/A | N/A | Y   | Y   | Y   | Y   | Y   |
| Discussion        |                                                           |     |     |     |     |     |     |     |     |
|                   | <i>18 - Key results</i>                                   | Y   | Y   | Y   | Y   | Y   | Y   | Y   | N   |
|                   | <i>19 - Limitations</i>                                   | Y   | Y   | Y   | N   | N   | N   | Y   | N   |
|                   | <i>20 - Interpretation</i>                                | Y   | Y   | Y   | N   | Y   | Y   | Y   | N   |
|                   | <i>21 - Generalisability</i>                              | Y   | Y   | Y   | Y   | Y   | Y   | Y   | N   |
| Other information |                                                           |     |     |     |     |     |     |     |     |
|                   | <i>22 - Funding</i>                                       | Y   | Y   | Y   | Y   | N   | N   | Y   | Y   |

1  
2  
3 Figure 2: 12-month prevalence of naturopathy use in different countries.  
4  
5  
6  
7  
8  
9  
10  
11  
12  
13  
14  
15  
16  
17  
18  
19  
20  
21  
22  
23  
24  
25  
26  
27  
28  
29  
30  
31  
32  
33  
34  
35  
36  
37  
38  
39  
40  
41  
42  
43  
44  
45  
46  
47  
48  
49  
50  
51  
52  
53  
54  
55  
56  
57  
58  
59  
60

For peer review only

1  
2  
3  
4  
5  
6  
7  
8  
9  
10  
11  
12  
13  
14  
15  
16  
17  
18  
19  
20  
21  
22  
23  
24  
25  
26  
27  
28  
29  
30  
31  
32  
33  
34  
35  
36  
37  
38  
39  
40  
41  
42  
43  
44  
45  
46  
47  
48  
49  
50  
51  
52  
53  
54  
55  
56  
57  
58  
59  
60

Figure 3: 12-month prevalence of naturopathy use in different WHO world regions.

For peer review only

1  
2  
3  
4  
5 **Figure 4: AVAILABILITY OF NATIONAL DATA REPORTING PREVALENCE OF CONSULTATIONS WITH A NATUROPATHIC PRACTITIONER, by**  
6 **countries with WNF member organisations or institutions**  
7

8 (0 = absent from national survey, 1 = present but aggregated with at least one other health profession, 2 = present as separate health profession; non-member  
9 countries are depicted in the lightest colour)  
10  
11  
12  
13  
14  
15  
16  
17  
18  
19  
20  
21  
22  
23  
24  
25  
26  
27  
28  
29  
30  
31  
32  
33  
34  
35  
36  
37  
38  
39  
40  
41  
42  
43  
44  
45  
46  
47  
48  
49  
50  
51  
52  
53  
54  
55  
56  
57  
58  
59  
60

For peer review only



1  
2  
3  
4  
5  
6  
7  
8  
9  
10  
11  
12  
13  
14  
15  
16  
17  
18  
19  
20  
21  
22  
23  
24  
25  
26  
27  
28  
29  
30  
31  
32  
33  
34  
35  
36  
37  
38  
39  
40  
41  
42  
43  
44  
45  
46

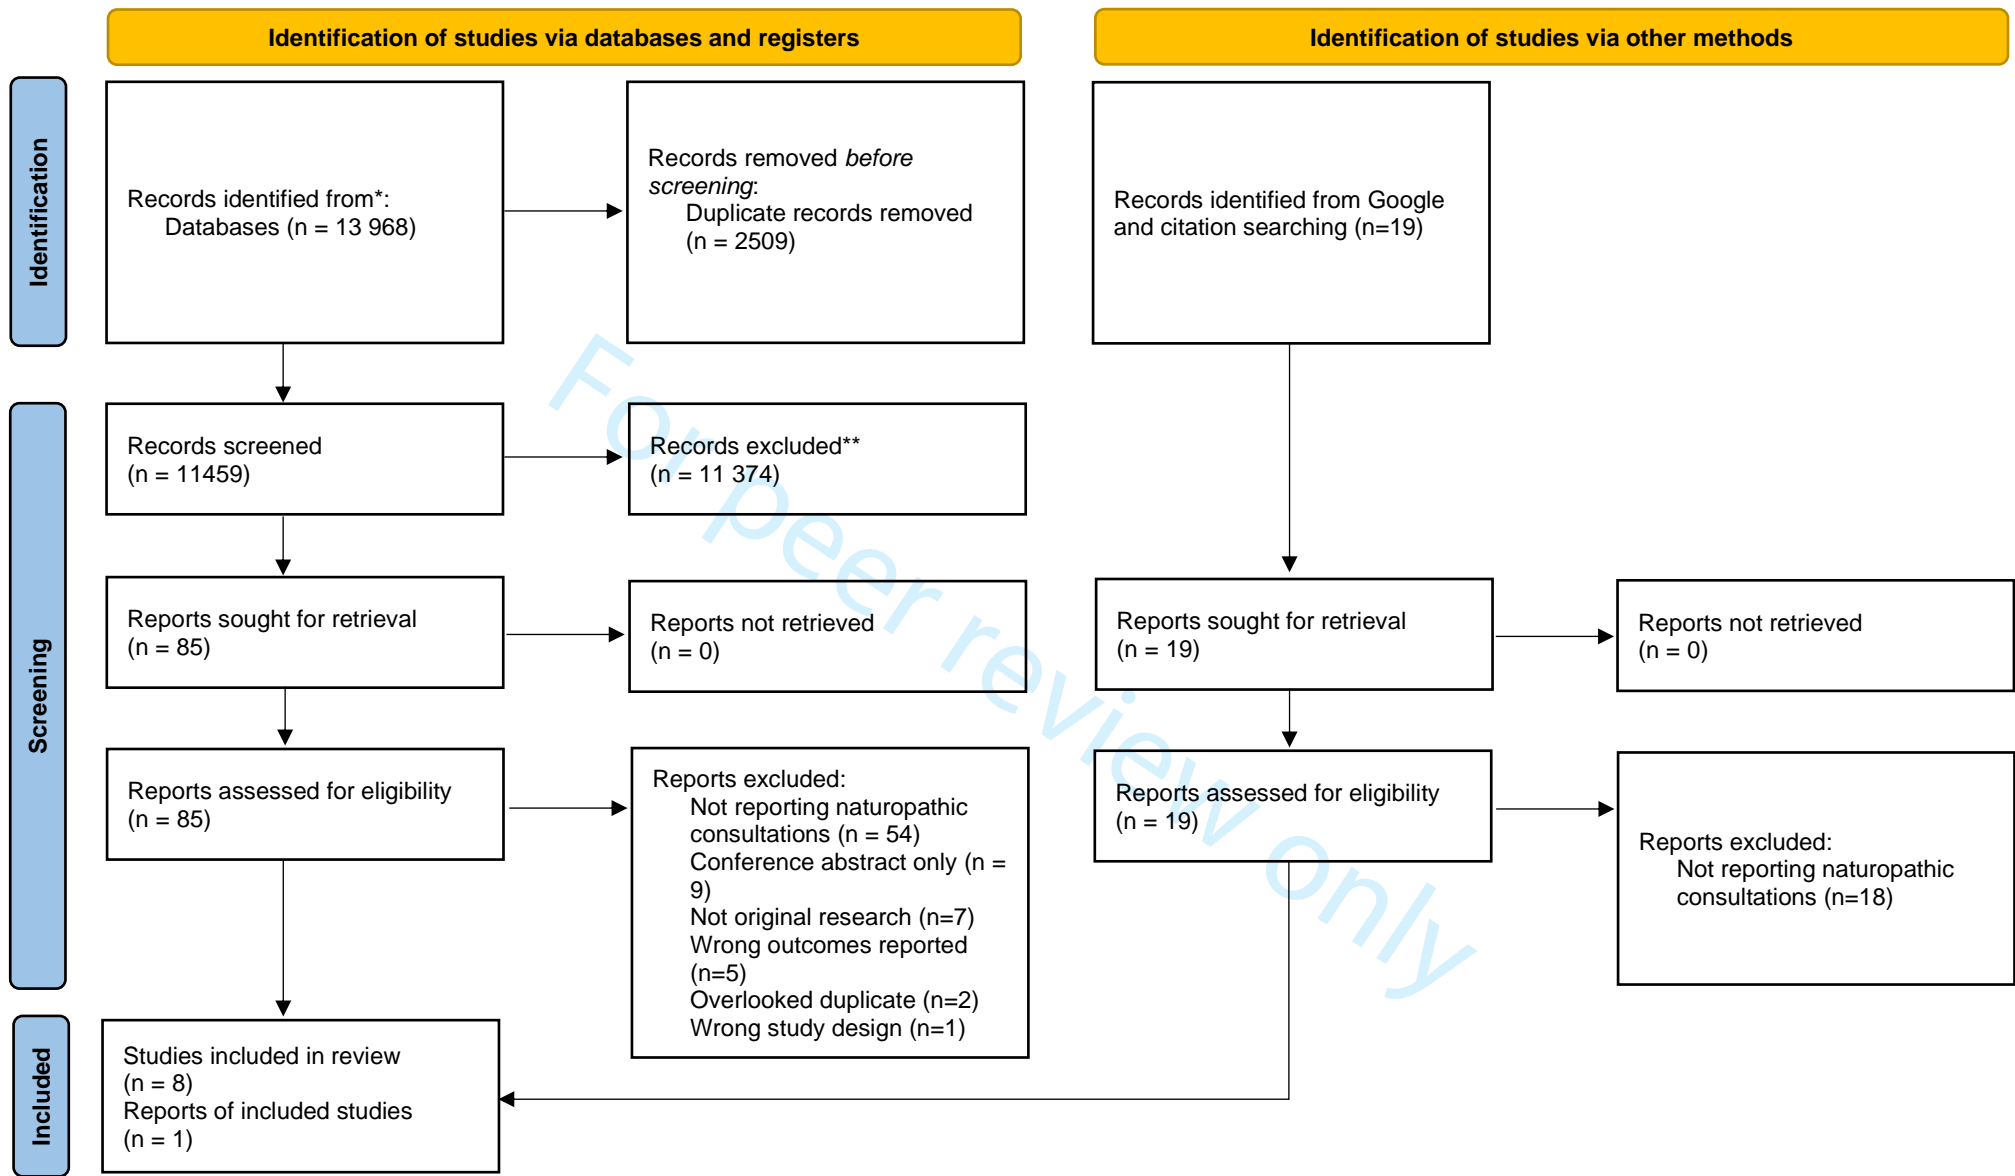

1  
2  
3  
4  
5  
6  
7  
8  
9  
10  
11  
12  
13  
14  
15  
16  
17  
18  
19  
20  
21  
22  
23  
24  
25  
26  
27  
28  
29  
30  
31  
32  
33  
34  
35  
36  
37  
38  
39  
40  
41  
42  
43  
44  
45  
46  
47  
48  
49  
50  
51  
52  
53  
54  
55  
56  
57  
58  
59  
60

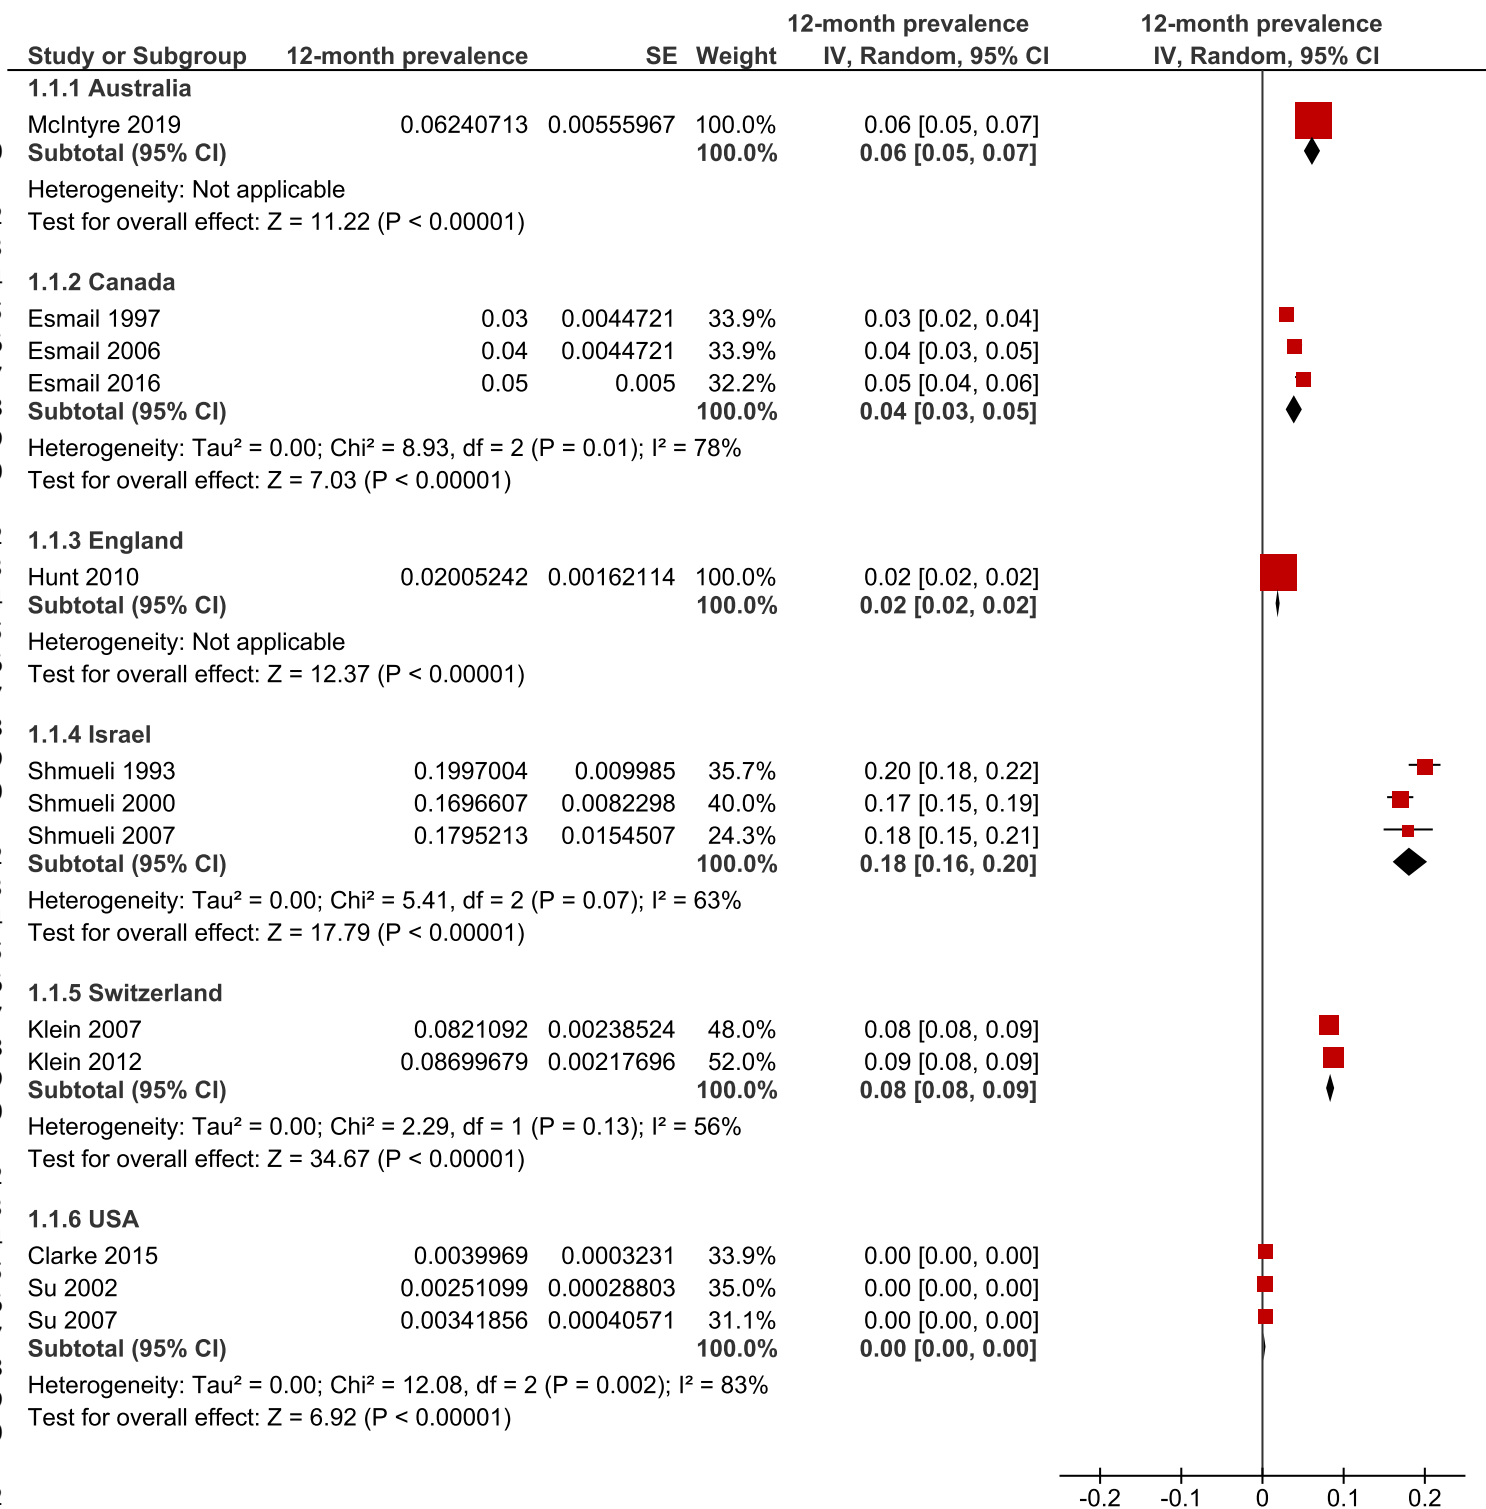

Test for subgroup differences: Chi<sup>2</sup> = 1554.47, df = 5 (P < 0.00001), I<sup>2</sup> = 99.7%

1  
2  
3  
4  
5  
6  
7  
8  
9  
10  
11  
12  
13  
14  
15  
16  
17  
18  
19  
20  
21  
22  
23  
24  
25  
26  
27  
28  
29  
30  
31  
32  
33  
34  
35  
36  
37  
38  
39  
40  
41  
42  
43  
44  
45  
46  
47  
48  
49  
50  
51  
52  
53  
54  
55  
56  
57  
58  
59  
60

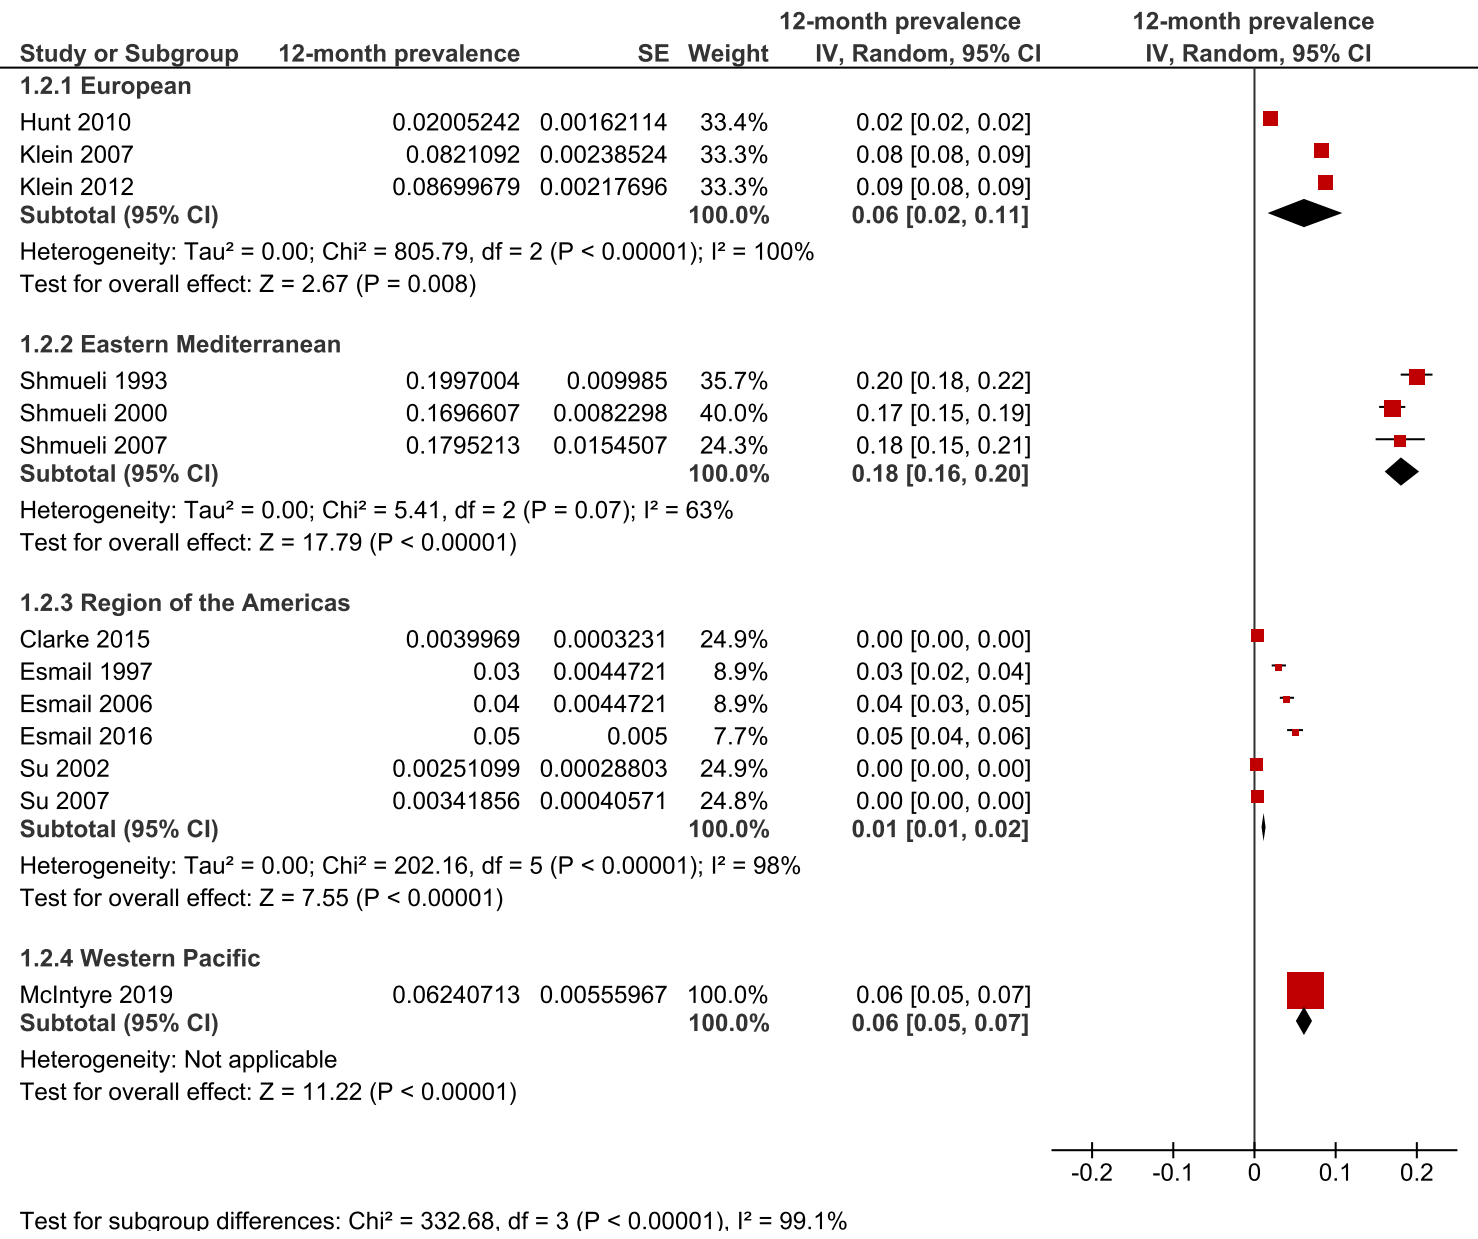

Test for subgroup differences: Chi<sup>2</sup> = 332.68, df = 3 (P < 0.00001), I<sup>2</sup> = 99.1%

Inclusion in National Survey Data 0 2

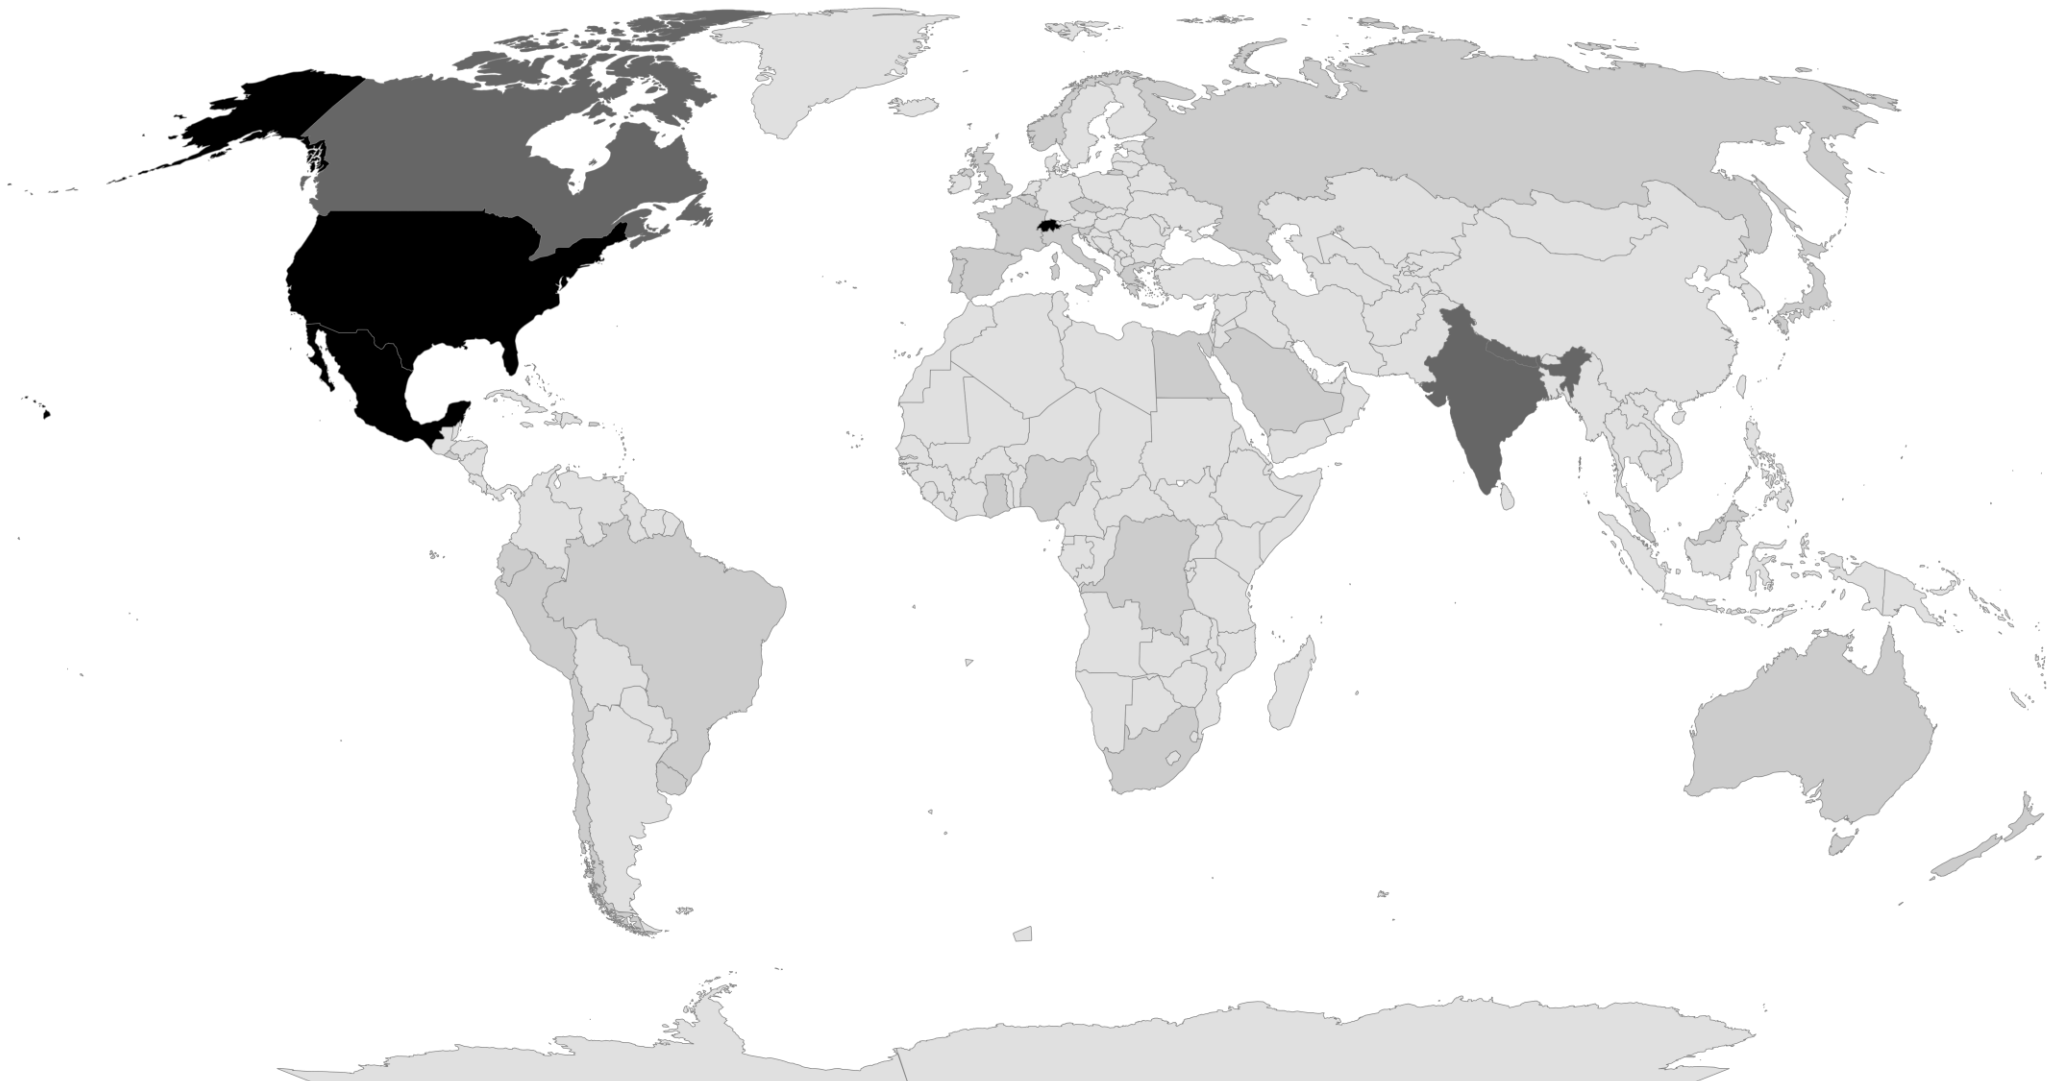

1  
2  
3  
4  
5  
6  
7  
8  
9  
10  
11  
12  
13  
14  
15  
16  
17  
18  
19  
20  
21  
22  
23  
24  
25  
26  
27  
28  
29  
30  
31  
32  
33  
34  
35  
36  
37  
38  
39  
40  
41

## Supplementary File 1: List of Excluded articles and reasons for exclusion

| Title                                                                                                                                                               | Authors                                                                            | Published Year | Journal                                                | Volume | Issue | Pages     | Notes                                                         | Tags |
|---------------------------------------------------------------------------------------------------------------------------------------------------------------------|------------------------------------------------------------------------------------|----------------|--------------------------------------------------------|--------|-------|-----------|---------------------------------------------------------------|------|
| <b>Trends in the use of complementary health approaches among adults: United States, 2002-2012</b>                                                                  | Clarke, T. C.; Black, L. I.; Stussman, B. J.; Barnes, P. M.; Nahin, R. L.          | 2015           | National health statistics reports                     |        |       | 79 Jan-16 | Exclusion reason: Does not report naturopathic consultations  |      |
| <b>The prevalence and experience of Australian naturopaths and Western herbalists working within community pharmacies</b>                                           |                                                                                    | 2011           | Journal of the Australian Traditional-Medicine Society | 17     | 4     | 240-240   | Exclusion reason: Duplicate                                   |      |
| <b>Why seek complementary medicine? An observational study in homeopathic, acupunctural, naturopathic and mainstream medical practice</b>                           | Van Dulmen, S.; De Groot, J.; Koster, D.; Heiligers, P. J. M.                      | 2010           | Journal of Complementary and Integrative Medicine      | 7      | 1     | 20        | Exclusion reason: Does not report naturopathic consultations; |      |
| <b>The Australian Complementary Medicine Workforce: A Profile of 1,306 Practitioners from the PRACI Study</b>                                                       | Steel, A.; Leach, M.; Wardle, J.; Sibbritt, D.; Schloss, J.; D. Iezel H; Adams, J. | 2018           | Journal of Alternative and Complementary Medicine      | 24     | 4     | 385-394   | Exclusion reason: Does not report naturopathic consultations; |      |
| <b>Primary Care in Oregon: The Naturopathic Physician's Perspective</b>                                                                                             | Linn, Brooke L.; Metcalf, Gary                                                     | 2018           |                                                        |        |       | 10979746  | 231 Exclusion reason: Not original research;                  |      |
| <b>Characteristics of the Australian complementary and alternative medicine (CAM) workforce</b>                                                                     | Leach, Matthew J.; McIntyre, Erica; Frawley, Jane                                  | 2014           | Australian Journal of Herbal Medicine                  | 26     | 2     | 58-65     | Exclusion reason: Does not report naturopathic consultations; |      |
| <b>[Which complementary and alternative medicine modalities are integrated within Israeli healthcare organizations and do they match the public's preferences?]</b> | Keshet, Y.; Ben-Arye, E.                                                           | 2011           | Harefuah                                               | 15     | 8     | 635-689   | Exclusion reason: Does not report naturopathic consultations; |      |
| <b>Complementary medical health services: a cross sectional descriptive analysis of a Canadian naturopathic teaching clinic</b>                                     | Kennedy, Deborah A.; Bernhardt, Bob; Snyder, Tara; Bancu, Viviana; Cooley, Kieran  | 2015           | BMC Complementary & Alternative Medicine               | 15     | 1     | 1-Oct     | Exclusion reason: Wrong outcomes;                             |      |
| <b>Characteristics and job satisfaction of general practitioners using complementary and alternative medicine in Germany--is there a pattern?</b>                   | Joos, Stefanie; Musselmann, Berthold; Szecsenyi, Joachim; Goetz, Katja             | 2011           | BMC Complementary and Alternative Medicine             | 11     |       | 131       | Exclusion reason: Wrong outcomes;                             |      |
| <b>Naturopathic practice at North American academic institutions: Description of 300,483 visits and comparison to conventional primary care</b>                     | Chamberlin, S. R.; Oberg, E.; Hanes, D. A.; Calabrese, C.                          | 2014           | Integrative Medicine Insights                          |        | 9     | Jul-15    | Exclusion reason: Wrong outcomes;                             |      |
| <b>Complementary and alternative medicine among Filipinos: Prevalence, costs and patterns of use</b>                                                                | Morfe, J. H. D.; Lim, V. S.                                                        | 2013           | Phillippine Journal of Internal Medicine               | 51     | 4     |           | Exclusion reason: Wrong study design;                         |      |

|    |                                                                                                                               |                                                                                               |      |                                                        |    |                        |                     |                                                               |  |
|----|-------------------------------------------------------------------------------------------------------------------------------|-----------------------------------------------------------------------------------------------|------|--------------------------------------------------------|----|------------------------|---------------------|---------------------------------------------------------------|--|
| 1  |                                                                                                                               |                                                                                               |      |                                                        |    |                        |                     |                                                               |  |
| 2  |                                                                                                                               |                                                                                               |      |                                                        |    |                        |                     |                                                               |  |
| 3  | <b>The prevalence and experience of Australian naturopaths and Western herbalists working within community pharmacies</b>     | Braun, L. A.; Spitzer, O.; Tiralongo, E.; Wilkinson, J. M.; Bailey, M.; Poole, S.; Dooley, M. | 2011 | BMC Complementary and Alternative Medicine             | 11 | 41                     | (23 May 2011)       | Exclusion reason: Wrong outcomes;                             |  |
| 4  |                                                                                                                               |                                                                                               |      |                                                        |    |                        |                     |                                                               |  |
| 5  |                                                                                                                               |                                                                                               |      |                                                        |    |                        |                     |                                                               |  |
| 6  | <b>Integration of complementary and alternative medicine into family practices in Germany: Results of a national survey</b>   | Joos, S.; Musselmann, B.; Szecsenyi, J.                                                       | 2011 | Evidence-based Complementary and Alternative Medicine  | 20 | 11                     | 495-813             | Exclusion reason: Wrong outcomes;                             |  |
| 7  |                                                                                                                               |                                                                                               |      |                                                        |    |                        |                     |                                                               |  |
| 8  |                                                                                                                               |                                                                                               |      |                                                        |    |                        |                     |                                                               |  |
| 9  | <b>USE OF COMPLEMENTARY AND ALTERNATIVE MEDICINE IN GEORGIA</b>                                                               | Nadareishvili, I.; Lunze, K.; Tabagari, N.; Beraia, A.; Pkhakadze, G.                         | 2017 | Georgian Medical News                                  |    |                        | 272-157-164         | Exclusion reason: Does not report naturopathic consultations; |  |
| 10 |                                                                                                                               |                                                                                               |      |                                                        |    |                        |                     |                                                               |  |
| 11 |                                                                                                                               |                                                                                               |      |                                                        |    |                        |                     |                                                               |  |
| 12 | <b>Complementary and alternative health care in Israel</b>                                                                    | Shuval, J. T.; Averbuch, E.                                                                   | 2012 | Israel Journal of Health Policy Research               | 1  | 1                      | 7                   | Exclusion reason: Does not report naturopathic consultations; |  |
| 13 |                                                                                                                               |                                                                                               |      |                                                        |    |                        |                     |                                                               |  |
| 14 |                                                                                                                               |                                                                                               |      |                                                        |    |                        |                     |                                                               |  |
| 15 |                                                                                                                               |                                                                                               |      |                                                        |    |                        |                     |                                                               |  |
| 16 | <b>WHO global report on traditional and complementary medicine 2019</b>                                                       | World Health Organisation                                                                     | 2019 |                                                        |    |                        |                     | Exclusion reason: Does not report naturopathic consultations; |  |
| 17 |                                                                                                                               |                                                                                               |      |                                                        |    |                        |                     |                                                               |  |
| 18 |                                                                                                                               |                                                                                               |      |                                                        |    |                        |                     |                                                               |  |
| 19 | <b>TRADITIONAL AND COMPLEMENTARY MEDICINE IN PRIMARY HEALTH CARE</b>                                                          | World Health Organisation                                                                     | 2018 |                                                        |    |                        | WHO/HIS/SDS/2018.37 | Exclusion reason: Does not report naturopathic consultations; |  |
| 20 |                                                                                                                               |                                                                                               |      |                                                        |    |                        |                     |                                                               |  |
| 21 |                                                                                                                               |                                                                                               |      |                                                        |    |                        |                     |                                                               |  |
| 22 | <b>The Philippines Health System Review</b>                                                                                   | World Health Organisation                                                                     | 2018 | Health Systems in Transition                           | 8  | 2                      | 352                 | Exclusion reason: Does not report naturopathic consultations; |  |
| 23 |                                                                                                                               |                                                                                               |      |                                                        |    |                        |                     |                                                               |  |
| 24 |                                                                                                                               |                                                                                               |      |                                                        |    |                        |                     |                                                               |  |
| 25 |                                                                                                                               |                                                                                               |      |                                                        |    |                        |                     |                                                               |  |
| 26 | <b>SURGICAL WORKFORCE IN INDIA</b>                                                                                            | World Health Organisation                                                                     | 2015 |                                                        |    |                        |                     | Exclusion reason: Does not report naturopathic consultations; |  |
| 27 |                                                                                                                               |                                                                                               |      |                                                        |    |                        |                     |                                                               |  |
| 28 |                                                                                                                               |                                                                                               |      |                                                        |    |                        |                     |                                                               |  |
| 29 | <b>The prevalence and experience of Australian naturopaths and Western herbalists working within community pharmacies. B</b>  |                                                                                               | 2011 | Journal of the Australian Traditional-Medicine Society | 17 | 3                      | 167-168             | Exclusion reason: Duplicate;                                  |  |
| 30 |                                                                                                                               |                                                                                               |      |                                                        |    |                        |                     |                                                               |  |
| 31 |                                                                                                                               |                                                                                               |      |                                                        |    |                        |                     |                                                               |  |
| 32 | <b>Use of traditional medicine and complementary and alternative medicine in Taiwan: a multilevel analysis</b>                | Yeh, Mei-Ling; Lin, Kuan-Chia; Chen, Hsing-Hsia; Wang, Yu-Jen; Huang, Yu-Chiao                | 2015 | Holistic Nursing Practice                              | 29 | 2                      | 87-95               | Exclusion reason: Does not report naturopathic consultations; |  |
| 33 |                                                                                                                               |                                                                                               |      |                                                        |    |                        |                     |                                                               |  |
| 34 |                                                                                                                               |                                                                                               |      |                                                        |    |                        |                     |                                                               |  |
| 35 | <b>Benchmarks for training in traditional /complementary and alternative medicine: benchmarks for training in naturopathy</b> | World Health Organisation                                                                     | 2010 |                                                        |    |                        |                     | Exclusion reason: Not original research;                      |  |
| 36 |                                                                                                                               |                                                                                               |      |                                                        |    |                        |                     |                                                               |  |
| 37 | <b>Malaysia health system review</b>                                                                                          | World Health Organisation                                                                     | 2012 | Health Systems in Transition                           | 2  | ISBN 978 92 9061 584 2 | 122                 | Exclusion reason: Not original research;                      |  |
| 38 |                                                                                                                               |                                                                                               |      |                                                        |    |                        |                     |                                                               |  |
| 39 |                                                                                                                               |                                                                                               |      |                                                        |    |                        |                     |                                                               |  |
| 40 |                                                                                                                               |                                                                                               |      |                                                        |    |                        |                     |                                                               |  |
| 41 |                                                                                                                               |                                                                                               |      |                                                        |    |                        |                     |                                                               |  |
| 42 |                                                                                                                               |                                                                                               |      |                                                        |    |                        |                     |                                                               |  |
| 43 |                                                                                                                               |                                                                                               |      |                                                        |    |                        |                     |                                                               |  |
| 44 |                                                                                                                               |                                                                                               |      |                                                        |    |                        |                     |                                                               |  |
| 45 |                                                                                                                               |                                                                                               |      |                                                        |    |                        |                     |                                                               |  |
| 46 |                                                                                                                               |                                                                                               |      |                                                        |    |                        |                     |                                                               |  |

1  
2  
3  
4  
5  
6  
7  
8  
9  
10  
11  
12  
13  
14  
15  
16  
17  
18  
19  
20  
21  
22  
23  
24  
25  
26  
27  
28  
29  
30  
31  
32  
33  
34  
35  
36  
37  
38  
39  
40  
41  
42  
43  
44  
45  
46

|                                                                                                                                                                                             |                                                                                                      |      |                                                 |    |                        |          |                                                                      |
|---------------------------------------------------------------------------------------------------------------------------------------------------------------------------------------------|------------------------------------------------------------------------------------------------------|------|-------------------------------------------------|----|------------------------|----------|----------------------------------------------------------------------|
| <b>New Zealand health system review</b>                                                                                                                                                     | World Health Organisation                                                                            | 2014 | Health Systems in Transition                    | 4  |                        | 272      | Exclusion reason: Not original research;                             |
| <b>The Regional Strategy for Traditional Medicine in the Western Pacific (2011-2020)</b>                                                                                                    | World Health Organisation                                                                            | 2012 |                                                 |    | ISBN 978 92 9061 559 0 | 71       | Exclusion reason: Not original research;                             |
| <b>WHO traditional medicine strategy: 2014-2023.</b>                                                                                                                                        | World Health Organisation                                                                            | 2013 |                                                 |    |                        | 78       | Exclusion reason: Not original research;                             |
| <b>Two-Thirds of Survey Respondents in Southern Sweden Used Complementary or Alternative Medicine in 2015</b>                                                                               | Wemrell, M.; Merlo, J.; Mulinari, S.; Hornborg, A. C.                                                | 2017 | Complementary medicine research                 | 24 | 5                      | 302-309  | Exclusion reason: Does not report naturopathic consultations;        |
| <b>Determinants for the Use of Complementary and Alternative Medicine: Results from a National Study</b>                                                                                    | Watts, Kristen Allen; Turner, Lori W.                                                                | 2018 |                                                 |    |                        | 10934635 | 307<br>Exclusion reason: Does not report naturopathic consultations; |
| <b>Distribution of complementary and alternative medicine (CAM) providers in rural New South Wales, Australia: a step towards explaining high CAM use in rural health?</b>                  | Wardle, Jon; Adams, Jon; Magalhaes, Ricardo J. Soares; Sibbritt, David                               | 2011 | The Australian Journal of rural health          | 19 | 4                      | 197-204  | Exclusion reason: Does not report naturopathic consultations;        |
| <b>The interface with naturopathy in rural primary health care: A survey of referral practices of general practitioners in rural and regional New South Wales, Australia</b>                | Wardle, J. L.; Sibbritt, D. W.; Adams, J.                                                            | 2014 | BMC Complementary and Alternative Medicine      | 14 |                        | 238      | Exclusion reason: Does not report naturopathic consultations;        |
| <b>Mapping the natural health landscape: New Zealand-based CAM professionals survey</b>                                                                                                     | Vempati, R.; Dunn, J.; Cottingham, P.; Sibbritt, D.; Adams, J.                                       | 2012 | BMC Complementary and Alternative Medicine      | 12 | SUPPL. 1               |          | Exclusion reason: Conference abstract only;                          |
| <b>Use of Complementary and Alternative Medicine in Bayamon, Puerto Rico</b>                                                                                                                | Torres-Zeno, R. E.; Rios-Motta, R.; Rodriguez-Sanchez, Y.; Miranda-Massari, J. R.; Marin-Centeno, H. | 2016 | Puerto Rico Health Sciences Journal             | 35 | 2                      | 69-75    | Exclusion reason: Does not report naturopathic consultations;        |
| <b>Attitude of Conventional and CAM Physicians Toward CAM in India</b>                                                                                                                      | Telles, Shirley; Gaur, Vaishali; Sharma, Sachin; Balkrishna, Acharya                                 | 2011 | Journal of Alternative & Complementary Medicine | 17 | 11                     | 106-1073 | Exclusion reason: Does not report naturopathic consultations;        |
| <b>Wellness versus treatment? Complementary and integrative healthcare (CIH) in the 2007 national health interview survey (NHIS)</b>                                                        | Stussman, B.; Alekel, L.; Nahin, R.; Edwards, E.; Barnes, P.                                         | 2012 | BMC Complementary and Alternative Medicine      | 12 | SUPPL. 1               |          | Exclusion reason: Conference abstract only;                          |
| <b>Generational differences in complementary medicine use in young Australian women: Repeated cross-sectional dataset analysis from the Australian longitudinal study on women's health</b> | Steel, A.; Munk, N.; Wardle, J.; Adams, J.; Sibbritt, D.; Lauche, R.                                 | 2019 | Complementary Therapies in Medicine             | 43 |                        | 66-72    | Exclusion reason: Does not report naturopathic consultations;        |
| <b>Complementary and alternative medicine: attitudes, knowledge and use among surgeons and anaesthesiologists in Hungary</b>                                                                | Soos, Sandor Arpad; Jeszenoi, Norbert; Darvas, Katalin; Harsanyi, Laszlo                             | 2016 | BMC Complementary and Alternative Medicine      | 16 | 1                      | 443      | Exclusion reason: Does not report                                    |

|                                                                                                                                                                                                                         |                                                                                                  |      |                                                               |    |            |         |      |                                                                        |
|-------------------------------------------------------------------------------------------------------------------------------------------------------------------------------------------------------------------------|--------------------------------------------------------------------------------------------------|------|---------------------------------------------------------------|----|------------|---------|------|------------------------------------------------------------------------|
|                                                                                                                                                                                                                         |                                                                                                  |      |                                                               |    |            |         |      | naturopathic consultations;                                            |
| <b>Complementary and alternative medicine: contemporary trends and issues</b>                                                                                                                                           | Smith, Joanna M.; John Sullivan, S.; David Baxter, G.                                            | 2011 | Physical Therapy Reviews                                      | 16 | 2          | 91-95   |      | Exclusion reason: Not original research;                               |
| <b>Use of complementary and alternative medicine in the population of Kedah Darul Aman, Malaysia</b>                                                                                                                    | Sivadasan, S.; Ali, A. N.; Lin, L. W.; Balakrishnan, D.; Ramachandran, S.; Dhanaraj, S. A.       | 2014 | International Journal of Pharmaceutical Sciences and Research | 5  | 4          | 126-127 | 3    | Exclusion reason: Does not report naturopathic consultations;          |
| <b>Epidemiology of the use of complementary and alternative medicine in central area of Sao Paulo</b>                                                                                                                   | Simoes, O.; Castro, B.                                                                           | 2013 | European Journal of Epidemiology                              | 28 | 1 SUPPL. 1 |         | S219 | Exclusion reason: Conference abstract only;                            |
| <b>[Complementary and alternative medicine services in Colombia]</b>                                                                                                                                                    | Rojas-Rojas, Alejandra                                                                           | 2012 | Servicios de medicina alternativa en Colombia.                | 14 | 3          | 470-7   |      | Exclusion reason: Does not report naturopathic consultations;          |
| <b>Composition and distribution of the health workforce in India: estimates based on data from the National Sample Survey</b>                                                                                           | Rao, K. D.; Shahrawat, R.; Bhatnagar, A.                                                         | 2016 | WHO South-East Asia journal of public health                  | 5  | 2          | 133-140 |      | Exclusion reason: Does not report naturopathic consultations;          |
| <b>Prevalence of Complementary and Alternative Medicine Use in the General Population in the Czech Republic</b>                                                                                                         | Pokladnikova, J.; Selke-Krulichova, I.                                                           | 2016 | Forschende Komplementarmediz in (2006)                        | 23 | 1          | 22-28   |      | Exclusion reason: Does not report naturopathic consultations;          |
| <b>Regional variation in use of complementary health approaches by U.S. adults</b>                                                                                                                                      | Peregoy, J. A.; Clarke, T. C.; Jones, L. I.; Stussman, B. J.; Nahin, R. L.                       | 2014 | NCHS Data Brief                                               |    |            |         | 146  | 1-Aug<br>Exclusion reason: Does not report naturopathic consultations; |
| <b>Utilization of traditional and complementary medicine in Indonesia: Results of a national survey in 2014-15</b>                                                                                                      | Pengpid, S.; Peltzer, K.                                                                         | 2018 | Complementary Therapies in Clinical Practice                  | 33 |            | 156-163 |      | Exclusion reason: Does not report naturopathic consultations;          |
| <b>Complementary and alternative medicine (CAM) utilization in Texas hospices</b>                                                                                                                                       | Olotu, B.; Brown, C. M.; Lawson, K.; Barner, J. C.                                               | 2012 | Value in Health                                               | 15 | 4          | A25     |      | Exclusion reason: Conference abstract only;                            |
| <b>Complementary and alternative medicine utilization in Texas hospices: Prevalence and challenges</b>                                                                                                                  | Olotu, B.; Brown, C.; Barner, J.; Lawson, K.                                                     | 2012 | Journal of the American Pharmacists Association               | 52 | 2          | 215-216 |      | Exclusion reason: Conference abstract only;                            |
| <b>Experiences and meanings of integration of TCAM (Traditional, Complementary and Alternative Medical) providers in three Indian states: results from a cross-sectional, qualitative implementation research study</b> | Nambiar, D.; Narayan, V. V.; Josyula, L. K.; Porter, J. D. H.; Sathyanarayana, T. N.; Sheikh, K. | 2014 | BMJ Open                                                      | 4  | 11         | e00520  | 3    | Exclusion reason: Does not report naturopathic consultations;          |
| <b>Naturopaths in Ontario, Canada: Geographic patterns in intermediately-sized metropolitan areas and integration implications</b>                                                                                      | Meyer, S. P.                                                                                     | 2017 | Journal of Complementary and Integrative Medicine             | 14 | 1          | 92      |      | Exclusion reason: Does not report                                      |



1  
2  
3  
4  
5  
6  
7  
8  
9  
10  
11  
12  
13  
14  
15  
16  
17  
18  
19  
20  
21  
22  
23  
24  
25  
26  
27  
28  
29  
30  
31  
32  
33  
34  
35  
36  
37  
38  
39  
40  
41  
42  
43  
44  
45  
46

|                                                                                                                                                                                                      |                                                                                                             |      |                                                           |          |              |                       |  |  |                                                               |
|------------------------------------------------------------------------------------------------------------------------------------------------------------------------------------------------------|-------------------------------------------------------------------------------------------------------------|------|-----------------------------------------------------------|----------|--------------|-----------------------|--|--|---------------------------------------------------------------|
|                                                                                                                                                                                                      |                                                                                                             |      |                                                           |          |              |                       |  |  | naturopathic consultations;                                   |
| <b>An investigation into the use of complementary and alternative medicine in an urban general practice</b>                                                                                          | McKenna, F.; Killoury, F.                                                                                   | 2010 | Irish Medical Journal                                     | 10<br>3  | 7            |                       |  |  | Exclusion reason: Does not report naturopathic consultations; |
| <b>A survey to explore the views and practices of CAM practitioners in the UK</b>                                                                                                                    | Majumdar, A.; Williams, S.; Adams, N.                                                                       | 2012 | BMC Complementary and Alternative Medicine                | 12       | SUPPL.<br>1  |                       |  |  | Exclusion reason: Conference abstract only;                   |
| <b>The prevalence of traditional and complementary medicine in the general population in Kashan, Iran, 2014</b>                                                                                      | Lotfi, M. S.; Adib-Hajbaghery, M.; Shahsavarloo, Z. R.; Gandomani, H. S.                                    | 2016 | European Journal of Integrative Medicine                  | 8        | 5            | 661-<br>669           |  |  | Exclusion reason: Does not report naturopathic consultations; |
| <b>Examining costs, utilization, and driving factors of complementary and alternative medicine (CAM) services</b>                                                                                    | Lewing, B.; Sangsiry, S. S.                                                                                 | 2018 | Value in Health                                           | 21       | Supplement 1 | S97                   |  |  | Exclusion reason: Conference abstract only;                   |
| <b>Profiling the Australian Consumer of Complementary and Alternative Medicine: A Secondary Analysis of National Health Survey Data</b>                                                              | Leach, M. J.                                                                                                | 2016 | Alternative therapies in health and medicine              | 22       | 4            | 64-<br>72             |  |  | Exclusion reason: Does not report naturopathic consultations; |
| <b>Complementary and alternative medicine (CAM) as part of primary health care in Germany-comparison of patients consulting general practitioners and CAM practitioners: A cross-sectional study</b> | Krug, K.; Kraus, K. I.; Herrmann, K.; Joos, S.                                                              | 2016 | BMC Complementary and Alternative Medicine                | 16       | 1            | 409                   |  |  | Exclusion reason: Does not report naturopathic consultations; |
| <b>Understanding CAM use in Lebanon: Findings from a national survey</b>                                                                                                                             | Kharroubi, S.; Chehab, R. F.; El-Baba, C.; Alameddine, M.; Naja, F.                                         | 2018 | Evidence-based Complementary and Alternative Medicine     | 20<br>18 |              | 416<br>915<br>9       |  |  | Exclusion reason: Does not report naturopathic consultations; |
| <b>Use of complementary and alternative medicine in Europe: Health-related and sociodemographic determinants</b>                                                                                     | Kemppainen, Laura M.; Kemppainen, Teemu T.; Reippainen, Jutta A.; Salmenniemi, Suvi T.; Vuolanto, Pia H.    | 2018 | Scandinavian Journal of Public Health                     | 46       | 4            | 448-<br>455           |  |  | Exclusion reason: Does not report naturopathic consultations; |
| <b>Complementary and alternative medicine usage in patients for different ailments in rural region of malwa area of punjab: A cross-sectional study</b>                                              | Kaur, K.; Singh, B.; Kaur, G.                                                                               | 2016 | National Journal of Physiology, Pharmacy and Pharmacology | 6        | 5            | 394-<br>398           |  |  | Exclusion reason: Does not report naturopathic consultations; |
| <b>Determinants of patients preferring Complementary and Alternative medicine attending public hospitals in Lahore, Pakistan</b>                                                                     | Hussain, A.; Ayesha.; Mufti, R. K.; Shahid, M.; Hassan, M. N.; Sultan, T.; Zahid, M. N.; Ali, I.; Iqbal, H. | 2018 | Journal of the Pakistan Medical Association               | 68       | 6            | 914-<br>918           |  |  | Exclusion reason: Does not report naturopathic consultations; |
| <b>State and Regional Comparisons of the Use of Complementary Health Approaches: National Health Interview Survey, 2012</b>                                                                          | Jones, Lindsey; Peregoy, Jennifer; Stussman, Barbara; Nahin, Richard                                        | 2014 | Journal of Alternative & Complementary Medicine           | 20       | 5            | A14<br>3-<br>A14<br>3 |  |  | Exclusion reason: Conference abstract only;                   |

|    |                                                                                                                                                                      |                                                                                                                                                                 |      |                                                        |    |          |           |                                                               |  |
|----|----------------------------------------------------------------------------------------------------------------------------------------------------------------------|-----------------------------------------------------------------------------------------------------------------------------------------------------------------|------|--------------------------------------------------------|----|----------|-----------|---------------------------------------------------------------|--|
| 1  |                                                                                                                                                                      |                                                                                                                                                                 |      |                                                        |    |          |           |                                                               |  |
| 2  |                                                                                                                                                                      |                                                                                                                                                                 |      |                                                        |    |          |           |                                                               |  |
| 3  | <b>Knowledge, attitude and practice of complementary and alternative medicine: A patient's perspective</b>                                                           | Jaiswal, K. M.; Bajait, C. S.; Pimpalkhute, S. A.; Dakhle, G. N.; Sontakke, S. D.; Magdum, A.                                                                   | 2013 | Indian Journal of Pharmacology                         | 45 | SUPPL. 1 | S221      | Exclusion reason: Does not report naturopathic consultations; |  |
| 4  |                                                                                                                                                                      |                                                                                                                                                                 |      |                                                        |    |          |           |                                                               |  |
| 5  |                                                                                                                                                                      |                                                                                                                                                                 |      |                                                        |    |          |           |                                                               |  |
| 6  | <b>Use of complementary and alternative medicine within Norwegian hospitals</b>                                                                                      | Jacobsen, R.; Fjell, V. M.; Foss, N.; Kristoffersen, A. E.                                                                                                      | 2015 | BMC Complementary & Alternative Medicine               | 15 | 1        | 1-Jun     | Exclusion reason: Does not report naturopathic consultations; |  |
| 7  |                                                                                                                                                                      |                                                                                                                                                                 |      |                                                        |    |          |           |                                                               |  |
| 8  |                                                                                                                                                                      |                                                                                                                                                                 |      |                                                        |    |          |           |                                                               |  |
| 9  |                                                                                                                                                                      |                                                                                                                                                                 |      |                                                        |    |          |           |                                                               |  |
| 10 | <b>Association between belief and attitude toward preference of complementary alternative medicine use</b>                                                           | Islahudin, F.; Shahdan, I. A.; Mohamad-Samuri, S.                                                                                                               | 2017 | Patient Preference and Adherence                       | 11 |          | 913-918   | Exclusion reason: Does not report naturopathic consultations; |  |
| 11 |                                                                                                                                                                      |                                                                                                                                                                 |      |                                                        |    |          |           |                                                               |  |
| 12 |                                                                                                                                                                      |                                                                                                                                                                 |      |                                                        |    |          |           |                                                               |  |
| 13 | <b>Patients' use of CAM: Results from the Health Survey for England 2005</b>                                                                                         | Hunt, K. J.; Ernst, E.                                                                                                                                          | 2010 | Focus on Alternative and Complementary Therapies       | 15 | 2        | 101-103   | Exclusion reason: Does not report naturopathic consultations; |  |
| 14 |                                                                                                                                                                      |                                                                                                                                                                 |      |                                                        |    |          |           |                                                               |  |
| 15 |                                                                                                                                                                      |                                                                                                                                                                 |      |                                                        |    |          |           |                                                               |  |
| 16 | <b>The utilization of complementary and alternative medicine in Taiwan: An internet survey using an adapted version of the international questionnaire (I-CAM-Q)</b> | Huang, C. W.; Tran, D. N. H.; Li, T. F.; Sasaki, Y.; Lee, J. A.; Lee, M. S.; Arai, I.; Motoo, Y.; Yukawa, K.; Tsutani, K.; Ko, S. G.; Hwang, S. J.; Chen, F. P. | 2019 | Journal of the Chinese Medical Association             | 82 | 8        | 665-671   | Exclusion reason: Does not report naturopathic consultations; |  |
| 17 |                                                                                                                                                                      |                                                                                                                                                                 |      |                                                        |    |          |           |                                                               |  |
| 18 |                                                                                                                                                                      |                                                                                                                                                                 |      |                                                        |    |          |           |                                                               |  |
| 19 | <b>Utilization of complimentary and alternative health services in Iceland</b>                                                                                       | Helgadóttir, B.; Vilhjálmsson, R.; Gunnarsdóttir, T. J.                                                                                                         | 2010 | Laeknabladid                                           | 96 | 4        | 267-273   | Exclusion reason: Does not report naturopathic consultations; |  |
| 20 |                                                                                                                                                                      |                                                                                                                                                                 |      |                                                        |    |          |           |                                                               |  |
| 21 |                                                                                                                                                                      |                                                                                                                                                                 |      |                                                        |    |          |           |                                                               |  |
| 22 |                                                                                                                                                                      |                                                                                                                                                                 |      |                                                        |    |          |           |                                                               |  |
| 23 | <b>The use of complementary and alternative medicine in Iceland: Results from a national health survey</b>                                                           | Gunnarsdóttir, T. J.; Orlygsdóttir, B.; Vilhjálmsson, R.                                                                                                        | 2019 | Scandinavian Journal of Public Health                  |    |          | 1.40 E+15 | Exclusion reason: Does not report naturopathic consultations; |  |
| 24 |                                                                                                                                                                      |                                                                                                                                                                 |      |                                                        |    |          |           |                                                               |  |
| 25 |                                                                                                                                                                      |                                                                                                                                                                 |      |                                                        |    |          |           |                                                               |  |
| 26 | <b>The Natural Medicine Workforce in Australia: A National Survey Part 1</b>                                                                                         | Grace, S.; Rogers, S.; Eddey, S.                                                                                                                                | 2013 | Journal of the Australian Traditional-Medicine Society | 19 | 1        | 13-18     | Exclusion reason: Does not report naturopathic consultations; |  |
| 27 |                                                                                                                                                                      |                                                                                                                                                                 |      |                                                        |    |          |           |                                                               |  |
| 28 |                                                                                                                                                                      |                                                                                                                                                                 |      |                                                        |    |          |           |                                                               |  |
| 29 | <b>The natural medicine workforce in Australia: A national survey Part 2</b>                                                                                         | Grace, S.; Rogers, S.; Eddey, S.                                                                                                                                | 2013 | Journal of the Australian Traditional-Medicine Society | 19 | 2        | 79-86     | Exclusion reason: Does not report naturopathic consultations; |  |
| 30 |                                                                                                                                                                      |                                                                                                                                                                 |      |                                                        |    |          |           |                                                               |  |
| 31 |                                                                                                                                                                      |                                                                                                                                                                 |      |                                                        |    |          |           |                                                               |  |
| 32 |                                                                                                                                                                      |                                                                                                                                                                 |      |                                                        |    |          |           |                                                               |  |
| 33 | <b>Complementary alternative medicine (CAM) use in Ireland: A secondary analysis of SLAN data</b>                                                                    | Fox, P.; Coughlan, B.; Butler, M.; Kelleher, C.                                                                                                                 | 2010 | Complementary Therapies in Medicine                    | 18 | 2        | 95-103    | Exclusion reason: Does not report naturopathic consultations; |  |
| 34 |                                                                                                                                                                      |                                                                                                                                                                 |      |                                                        |    |          |           |                                                               |  |
| 35 |                                                                                                                                                                      |                                                                                                                                                                 |      |                                                        |    |          |           |                                                               |  |
| 36 | <b>Who uses complementary and alternative therapies in regional South Australia? Evidence from the Whyalla Intergenerational Study of Health</b>                     | D'Onise, K.; Haren, M. T.; Misan, G. M. H.; McDermott, R. A.                                                                                                    | 2013 | Australian Health Review                               | 37 | 1        | 104-111   | Exclusion reason: Does not report naturopathic consultations; |  |
| 37 |                                                                                                                                                                      |                                                                                                                                                                 |      |                                                        |    |          |           |                                                               |  |
| 38 |                                                                                                                                                                      |                                                                                                                                                                 |      |                                                        |    |          |           |                                                               |  |
| 39 |                                                                                                                                                                      |                                                                                                                                                                 |      |                                                        |    |          |           |                                                               |  |
| 40 |                                                                                                                                                                      |                                                                                                                                                                 |      |                                                        |    |          |           |                                                               |  |
| 41 |                                                                                                                                                                      |                                                                                                                                                                 |      |                                                        |    |          |           |                                                               |  |
| 42 |                                                                                                                                                                      |                                                                                                                                                                 |      |                                                        |    |          |           |                                                               |  |
| 43 |                                                                                                                                                                      |                                                                                                                                                                 |      |                                                        |    |          |           |                                                               |  |
| 44 |                                                                                                                                                                      |                                                                                                                                                                 |      |                                                        |    |          |           |                                                               |  |
| 45 |                                                                                                                                                                      |                                                                                                                                                                 |      |                                                        |    |          |           |                                                               |  |
| 46 |                                                                                                                                                                      |                                                                                                                                                                 |      |                                                        |    |          |           |                                                               |  |

1  
2  
3  
4  
5  
6  
7  
8  
9  
10  
11  
12  
13  
14  
15  
16  
17  
18  
19  
20  
21  
22  
23  
24  
25  
26  
27  
28  
29  
30  
31  
32  
33  
34  
35  
36  
37  
38  
39  
40  
41  
42  
43  
44  
45  
46

|                                                                                                                                                            |                                                                                                       |      |                                                        |         |       |                       |                                                               |
|------------------------------------------------------------------------------------------------------------------------------------------------------------|-------------------------------------------------------------------------------------------------------|------|--------------------------------------------------------|---------|-------|-----------------------|---------------------------------------------------------------|
| <b>The characteristics, experiences and perceptions of naturopathic and herbal medicine practitioners: results from a national survey in New Zealand</b>   | Cottingham, P.; Adams, J.; Vempati, R.; Dunn, J.; Sibbritt, D.                                        | 2015 | Journal of the Australian Traditional-Medicine Society | 21      | 2     | 130-130               | Exclusion reason: Does not report naturopathic consultations; |
| <b>Integration of complementary and alternative medicine into medical schools in Austria, Germany and Switzerland - Results of a cross-sectional study</b> | Brinkhaus, B.; Witt, C. M.; Jena, S.; Bockelbrink, A.; Ortiz, M.; Willich, S. N.                      | 2011 | Wiener Medizinische Wochenschrift                      | 16<br>1 | 1-Feb | 32-43                 | Exclusion reason: Does not report naturopathic consultations; |
| <b>The use of complementary therapies in Chile: Results from the national health survey 2010-2011</b>                                                      | Bedregal, P.; Passi, A.; Guerra, X.; Chang, M.                                                        | 2016 | Journal of Alternative and Complementary Medicine      | 22      | 6     | A10<br>3-<br>A10<br>4 | Exclusion reason: Conference abstract only;                   |
| <b>Complementary and Alternative Medicine (CAM) among adults in Italy: Use and related satisfaction</b>                                                    | Barbadoro, P.; Chiatti, C.; D'Errico, M. M.; Minelli, A.; Pennacchietti, L.; Ponzio, E.; Prospero, E. | 2011 | European Journal of Integrative Medicine               | 3       | 4     | e31<br>9-<br>e32<br>6 | Exclusion reason: Does not report naturopathic consultations; |
| <b>A preliminary study of complementary and alternative medicine (CAM) practitioners in Singapore</b>                                                      | Ang, S. C.; Wilkinson, J. M.                                                                          | 2013 | Complementary Therapies in Medicine                    | 21      | 1     | 42-49                 | Exclusion reason: Does not report naturopathic consultations; |
| <b>Use of complementary and alternative medicine among asthmatic patients in primary care clinics in Malaysia</b>                                          | Alshagga, M. A.; Al-Dubai, S. A.; Muhamad Faiq, S. S.; Yusuf, A. A.                                   | 2011 | Annals of Thoracic Medicine                            | 6       | 3     | 115-119               | Exclusion reason: Does not report naturopathic consultations; |
| <b>Knowledge, attitude and practice toward complementary and traditional medicine among Kashan health care staff, 2012</b>                                 | Adib-Hajbaghery, M.; Hoseinian, M.                                                                    | 2014 | Complementary Therapies in Medicine                    | 22      | 1     | 126-132               | Exclusion reason: Does not report naturopathic consultations; |
| <b>A survey of complementary and alternative medicine in Iran</b>                                                                                          | Abolhassani, Hassan; Naseri, Mohsen; Mahmoudzadeh, Sanam                                              | 2012 | Chinese Journal of Integrative Medicine                | 18      | 6     | 409-416               | Exclusion reason: Does not report naturopathic consultations; |

Supplementary File 2: List of national surveys from WNF member countries, with reference to inclusion of items examining naturopathy use

| Country             | Report/survey identified/located                                                                                                                                                                                                                                                  | Inclusion of naturopathy-specific item | Prevalence timeframe | Date last collected | Other dates collected    | Item/s | Data accessibility                                                                                                                                                                                                                                                     |
|---------------------|-----------------------------------------------------------------------------------------------------------------------------------------------------------------------------------------------------------------------------------------------------------------------------------|----------------------------------------|----------------------|---------------------|--------------------------|--------|------------------------------------------------------------------------------------------------------------------------------------------------------------------------------------------------------------------------------------------------------------------------|
| <b>FULL MEMBERS</b> |                                                                                                                                                                                                                                                                                   |                                        |                      |                     |                          |        |                                                                                                                                                                                                                                                                        |
| Australia           | National Health Survey                                                                                                                                                                                                                                                            | Absent                                 |                      | 2021                |                          |        |                                                                                                                                                                                                                                                                        |
| Belgium             | Health Interview Survey<br><a href="https://his.wiv-isp.be/fr/Documents%20partages/Summ_HC_FR_2018.pdf">https://his.wiv-isp.be/fr/Documents%20partages/Summ_HC_FR_2018.pdf</a>                                                                                                    | Absent                                 |                      | 2018                | Every 2 years from 1997  |        |                                                                                                                                                                                                                                                                        |
| Brazil              | National Health Survey - PNS<br>Table 3.21<br><a href="https://www.ibge.gov.br/en/statistics/social/health/16840-national-survey-of-health.html?=&amp;t=downloads">https://www.ibge.gov.br/en/statistics/social/health/16840-national-survey-of-health.html?=&amp;t=downloads</a> | Absent                                 |                      | 2019                | 2013                     |        | Appears to be available at link<br><a href="https://www.ibge.gov.br/en/statistics/social/health/16840-national-survey-of-health.html?=&amp;t=downloads">https://www.ibge.gov.br/en/statistics/social/health/16840-national-survey-of-health.html?=&amp;t=downloads</a> |
| Canada              | Canadian Health Measures Survey                                                                                                                                                                                                                                                   | Absent                                 |                      | 2019                | Every 2 years since 2011 | -      |                                                                                                                                                                                                                                                                        |
| Canada              | Canadian National Health Survey                                                                                                                                                                                                                                                   | Absent                                 | -                    | 2016                |                          | -      | CNHS: <a href="https://www.statcan.gc.ca/eng/surveys?MM=1">https://www.statcan.gc.ca/eng/surveys?MM=1</a>                                                                                                                                                              |

1  
2  
3  
4  
5  
6  
7  
8  
9  
10  
11  
12  
13  
14  
15  
16  
17  
18  
19  
20  
21  
22  
23  
24  
25  
26  
27  
28  
29  
30  
31  
32  
33  
34  
35  
36  
37  
38  
39  
40  
41  
42  
43  
44  
45  
46

|        |                                   |                                                              |              |                         |                          |                                                                                                                                                                                                                                                                                                                                                                                                            |                                                                                                                                                                                                                                                                                                                                                                                                                                                                                                                                                                                                                                                                                                                                                                                                                                                                                                                                                                                                                                                                                                                                                                                                                                                                             |
|--------|-----------------------------------|--------------------------------------------------------------|--------------|-------------------------|--------------------------|------------------------------------------------------------------------------------------------------------------------------------------------------------------------------------------------------------------------------------------------------------------------------------------------------------------------------------------------------------------------------------------------------------|-----------------------------------------------------------------------------------------------------------------------------------------------------------------------------------------------------------------------------------------------------------------------------------------------------------------------------------------------------------------------------------------------------------------------------------------------------------------------------------------------------------------------------------------------------------------------------------------------------------------------------------------------------------------------------------------------------------------------------------------------------------------------------------------------------------------------------------------------------------------------------------------------------------------------------------------------------------------------------------------------------------------------------------------------------------------------------------------------------------------------------------------------------------------------------------------------------------------------------------------------------------------------------|
| Canada | National Population Health Survey | Present but combined with other health service (homeopathy ) | 12 month use | 2010/11                 | Every 2 years since 1992 | A) People may also use alternative or complementary medicine. In the past 12 months, [have/has] [you/FNAME] seen or talked on the telephone to an alternative health care provider such as an acupuncturist, homeopath or massage therapist about [your/his/her] physical, emotional or mental health?<br>B) Who did you speak to (answer option is "homeopath or naturopath")                             | <p><a href="https://crdcn.org/datasets/nphs-national-population-health-survey">https://crdcn.org/datasets/nphs-national-population-health-survey</a><br/> <a href="https://crdcn.org/research">https://crdcn.org/research</a></p> <p>Application process for academic researchers<br/>         Researchers wishing to access the RDC should create an account on the Statistics Canada Microdata Access Platform and follow the steps to create a new proposal. The proposal is evaluated by Statistics Canada for feasibility before access can be granted. In addition, if you are a student, your thesis supervisor must write a letter in support of your RDC application and join the application as a co-investigator. For other academic users, a completed peer-review may be required. The review must be conducted by a tenured faculty-member at an accredited Canadian university. Researchers who are required to submit such a peer review can source their own peer reviewer, or contact CRDCN for assistance if they are unable to find a suitable candidate.<br/>         Access fees for certain users<br/>         Fees can apply to certain research projects conducted in the RDCs. Consult the Access &amp; Fee-For-Service Policy to learn more.</p> |
| Chile  | National Health Survey            | Absent                                                       |              | Unclear - maybe 2016/17 | Every 4 years            | Appears to exist, but cannot locate a recent copy of the survey or results. An earlier version (2009-10) suggests use of CAM was assessed, but all CAM were grouped together as one variable.<br><a href="https://www.who.int/fctc/reporting/party_reports/chile_annex1_national_health_survey_2010.pdf">https://www.who.int/fctc/reporting/party_reports/chile_annex1_national_health_survey_2010.pdf</a> | Maybe somewhere on this site (might need a Spanish-speaker):<br><a href="https://deis.minsal.cl/#estadisticas">https://deis.minsal.cl/#estadisticas</a>                                                                                                                                                                                                                                                                                                                                                                                                                                                                                                                                                                                                                                                                                                                                                                                                                                                                                                                                                                                                                                                                                                                     |
| Cyprus | "State of health" survey          | Absent                                                       |              | 2019                    |                          |                                                                                                                                                                                                                                                                                                                                                                                                            | <p><a href="https://ec.europa.eu/health/sites/health/files/state/docs/2019_chp_cyprus_english.pdf">https://ec.europa.eu/health/sites/health/files/state/docs/2019_chp_cyprus_english.pdf</a><br/> <a href="https://www.euro.who.int/__data/assets/pdf_file/0007/355975/Health-Profile-Cyprus-Eng.pdf">https://www.euro.who.int/__data/assets/pdf_file/0007/355975/Health-Profile-Cyprus-Eng.pdf</a></p>                                                                                                                                                                                                                                                                                                                                                                                                                                                                                                                                                                                                                                                                                                                                                                                                                                                                     |



1  
2  
3  
4  
5  
6  
7  
8  
9  
10  
11  
12  
13  
14  
15  
16  
17  
18  
19  
20  
21  
22  
23  
24  
25  
26  
27  
28  
29  
30  
31  
32  
33  
34  
35  
36  
37  
38  
39  
40  
41  
42  
43  
44  
45  
46

|       |                                                                      |                                                       |                                                                                                                                                                                                                                                                                      |         |                                          |                                                                                                                                                                    |                                                                                                              |
|-------|----------------------------------------------------------------------|-------------------------------------------------------|--------------------------------------------------------------------------------------------------------------------------------------------------------------------------------------------------------------------------------------------------------------------------------------|---------|------------------------------------------|--------------------------------------------------------------------------------------------------------------------------------------------------------------------|--------------------------------------------------------------------------------------------------------------|
| India | NFHS - National Family Health Survey                                 | Present but combined with other health service (yoga) | Generally used when sick (household questionnaire)<br><br>Men's and women's questionnaires also asks about places to receive family planning, where they take children when sick, and a number of other specific details relating to health care utilisation around family planning. | 2019-20 | 2015-16<br>2005-06<br>1998-99<br>1992-93 | Q. When members of your household get sick, where do they generally go for treatment?<br>A. (option) Yoga and Naturopathy [also separates into public and private] | Process is unclear?<br><a href="http://rchiips.org/nfhs/data1.shtml">http://rchiips.org/nfhs/data1.shtml</a> |
| India | AHS - Annual Health Survey                                           | Absent                                                |                                                                                                                                                                                                                                                                                      |         |                                          |                                                                                                                                                                    |                                                                                                              |
| Italy | ISSP - International Social Survey Programme: Health and Health Care | Absent                                                | 12 month use                                                                                                                                                                                                                                                                         | 2011    |                                          | During the past 12 months, how often did you visit or were visited by... an [alternative/traditional/folk]health care practitioner?                                | <a href="https://search.gesis.org/research_data/ZA5800">https://search.gesis.org/research_data/ZA5800</a>    |
| Italy | Italy National Healthy Survey                                        | <b>Unknown due to survey availability</b>             |                                                                                                                                                                                                                                                                                      |         |                                          |                                                                                                                                                                    |                                                                                                              |

|             |                                                               |                                                                        |                                                                                                  |         |                                       |                                                                                                                                                                                                                                    |                                                                                                                                                                                                                                                                                                                                                                                                                                                                                                                                                                                                                                                                                             |
|-------------|---------------------------------------------------------------|------------------------------------------------------------------------|--------------------------------------------------------------------------------------------------|---------|---------------------------------------|------------------------------------------------------------------------------------------------------------------------------------------------------------------------------------------------------------------------------------|---------------------------------------------------------------------------------------------------------------------------------------------------------------------------------------------------------------------------------------------------------------------------------------------------------------------------------------------------------------------------------------------------------------------------------------------------------------------------------------------------------------------------------------------------------------------------------------------------------------------------------------------------------------------------------------------|
| Italy       | EHIS - European Health Interview Survey                       | Absent                                                                 |                                                                                                  | 2019    | 2015                                  |                                                                                                                                                                                                                                    | <a href="https://www.istat.it/en/archivio/210553">https://www.istat.it/en/archivio/210553</a>                                                                                                                                                                                                                                                                                                                                                                                                                                                                                                                                                                                               |
| Japan       | The Japan National Health and Nutrition Survey (NHNS)         | Absent                                                                 |                                                                                                  |         |                                       |                                                                                                                                                                                                                                    |                                                                                                                                                                                                                                                                                                                                                                                                                                                                                                                                                                                                                                                                                             |
| Malaysia    | National Health and Morbidity Survey                          | Absent                                                                 |                                                                                                  |         |                                       |                                                                                                                                                                                                                                    | <a href="https://iptk.moh.gov.my/images/technical_report/2020/FactSheet_BI_AUG2020.pdf">https://iptk.moh.gov.my/images/technical_report/2020/FactSheet_BI_AUG2020.pdf</a>                                                                                                                                                                                                                                                                                                                                                                                                                                                                                                                   |
| Mexico      | National Health Survey (ENSA)                                 | Present (as 'Naturista')                                               | Unclear                                                                                          | 2018-19 | 2016<br>2012<br>2006                  | Q4.8:<br><a href="https://en.www.inegi.org.mx/contenidos/programas/ensanut/2018/doc/ensanut_2018_cuestionario_hogar.pdf">https://en.www.inegi.org.mx/contenidos/programas/ensanut/2018/doc/ensanut_2018_cuestionario_hogar.pdf</a> | <a href="https://en.www.inegi.org.mx/programas/ensanut/2018/">https://en.www.inegi.org.mx/programas/ensanut/2018/</a>                                                                                                                                                                                                                                                                                                                                                                                                                                                                                                                                                                       |
| Nepal       | DHS Demographic and Health survey                             | Absent                                                                 |                                                                                                  |         |                                       |                                                                                                                                                                                                                                    |                                                                                                                                                                                                                                                                                                                                                                                                                                                                                                                                                                                                                                                                                             |
| Nepal       | Noncommunicable Disease Risk Factors: STEPS Survey Nepal 2019 | Present but combined with other health services (traditional medicine) | For specific health conditions - Normal source of treatment For smoking cessation - 12 month use | 2019    |                                       | "During the past 12 months, what did you do to try and stop smoking?"<br>"Where do you usually go for treatment or advice for you >condition<?"<br>"Where do you usually get your drugs for >condition<?"                          | <a href="https://www.who.int/docs/default-source/nepal-documents/ncds/ncd-steps-survey-2019-compressed.pdf?sfvrsn=807bc4c6_2">https://www.who.int/docs/default-source/nepal-documents/ncds/ncd-steps-survey-2019-compressed.pdf?sfvrsn=807bc4c6_2</a>                                                                                                                                                                                                                                                                                                                                                                                                                                       |
| New Zealand | New Zealand Health Survey                                     | Absent                                                                 |                                                                                                  |         |                                       |                                                                                                                                                                                                                                    | <a href="https://www.health.govt.nz/publication/questionnaires-and-content-guide-2019-20-new-zealand-health-survey">https://www.health.govt.nz/publication/questionnaires-and-content-guide-2019-20-new-zealand-health-survey</a>                                                                                                                                                                                                                                                                                                                                                                                                                                                           |
| Nigeria     | DHS Demographic and Health survey                             | Absent                                                                 |                                                                                                  |         |                                       |                                                                                                                                                                                                                                    |                                                                                                                                                                                                                                                                                                                                                                                                                                                                                                                                                                                                                                                                                             |
| Peru        | ENCUESTA DEMOGRÁFICA Y DE SALUD FAMILIAR (ENDES)              | Absent                                                                 |                                                                                                  |         |                                       |                                                                                                                                                                                                                                    | <a href="http://inei.inei.gob.pe/microdatos/">http://inei.inei.gob.pe/microdatos/</a>                                                                                                                                                                                                                                                                                                                                                                                                                                                                                                                                                                                                       |
| Portugal    | National Health Survey                                        | Absent                                                                 |                                                                                                  | 2019    | 2018<br>2017<br>2016<br>etc. annually |                                                                                                                                                                                                                                    | <a href="https://www.ine.pt/xportal/xmain?PORTLET_ID=JSP&amp;xpgid=ine_publicacoes&amp;xpid=INE&amp;PORTLET_NAME=ine_cont_header_pub_en&amp;PORTLET_UID=%23JSP%3Aine_cont_header_pub_en%23&amp;PUBLICACOESStema=00&amp;PUBLICACOESdata_inicial=01-07-2014&amp;PUBLICACOESdata_final=13-07-2021&amp;x=14&amp;y=10&amp;PUBLICACOESfreeText=health">https://www.ine.pt/xportal/xmain?PORTLET_ID=JSP&amp;xpgid=ine_publicacoes&amp;xpid=INE&amp;PORTLET_NAME=ine_cont_header_pub_en&amp;PORTLET_UID=%23JSP%3Aine_cont_header_pub_en%23&amp;PUBLICACOESStema=00&amp;PUBLICACOESdata_inicial=01-07-2014&amp;PUBLICACOESdata_final=13-07-2021&amp;x=14&amp;y=10&amp;PUBLICACOESfreeText=health</a> |



1  
2  
3  
4  
5  
6  
7  
8  
9  
10  
11  
12  
13  
14  
15  
16  
17  
18  
19  
20  
21  
22  
23  
24  
25  
26  
27  
28  
29  
30  
31  
32  
33  
34  
35  
36  
37  
38  
39  
40  
41  
42  
43  
44  
45  
46

|              |                                                                                  |                                    |  |      |                         |  |                                                                                                                                                                                                                                                                                         |
|--------------|----------------------------------------------------------------------------------|------------------------------------|--|------|-------------------------|--|-----------------------------------------------------------------------------------------------------------------------------------------------------------------------------------------------------------------------------------------------------------------------------------------|
| Puerto Rico  | Unknown                                                                          |                                    |  |      |                         |  |                                                                                                                                                                                                                                                                                         |
|              | Longitudinal Monitoring Survey of HSE (health service questions in Adult survey) |                                    |  |      |                         |  |                                                                                                                                                                                                                                                                                         |
| Russia       |                                                                                  | Absent                             |  | 2019 | 1994 onward             |  | <a href="https://rlms-hse.cpc.unc.edu/">https://rlms-hse.cpc.unc.edu/</a>                                                                                                                                                                                                               |
| Russia       | Kantar National Health and Wellness Survey                                       | Unknown due to survey availability |  | 2011 |                         |  | <a href="https://www.kantar.com/expertise/health/da---real-world-data-pros-claims-and-health-records/national-health-and-wellness-survey-nhws">https://www.kantar.com/expertise/health/da---real-world-data-pros-claims-and-health-records/national-health-and-wellness-survey-nhws</a> |
| Saudi Arabia | World Health Survey Saudi Arabia (KSAWHS)                                        | Absent                             |  | 2019 |                         |  | <a href="https://www.moh.gov.sa/en/Ministry/Statistics/Population-Health-Indicators/Documents/World-Health-Survey-Saudi-Arabia.pdf">https://www.moh.gov.sa/en/Ministry/Statistics/Population-Health-Indicators/Documents/World-Health-Survey-Saudi-Arabia.pdf</a>                       |
| Saudi Arabia | Saudi Health Interview Survey                                                    | Absent                             |  | 2013 |                         |  | <a href="http://www.healthdata.org/sites/default/files/files/Projects/KSA/Saudi-Health-Interview-Survey-Results.pdf">http://www.healthdata.org/sites/default/files/files/Projects/KSA/Saudi-Health-Interview-Survey-Results.pdf</a>                                                     |
| Saudi Arabia | Saudi Health Interview Census                                                    | Unknown due to survey availability |  | 2015 |                         |  |                                                                                                                                                                                                                                                                                         |
| Slovenia     | World Health Survey                                                              | Absent                             |  |      |                         |  |                                                                                                                                                                                                                                                                                         |
| Slovenia     | European Health Interview Survey                                                 | Absent                             |  | 2007 |                         |  | <a href="https://www.stat.si/doc/pub/IVZ-angl.pdf">https://www.stat.si/doc/pub/IVZ-angl.pdf</a><br><a href="https://ec.europa.eu/eurostat/web/microdata/european-health-interview-survey">https://ec.europa.eu/eurostat/web/microdata/european-health-interview-survey</a>              |
| South Africa | South Africa Demographic and Health Survey (DHS)                                 | Absent                             |  | 2016 | 2003                    |  | <a href="https://dhsprogram.com/pubs/pdf/FR337/FR337.pdf">https://dhsprogram.com/pubs/pdf/FR337/FR337.pdf</a>                                                                                                                                                                           |
| South Africa | South African Health and Nutrition Examination Survey (SANHANES-1)               | Absent                             |  | 2012 |                         |  | file:///C:/Users/User/AppData/Local/Temp/7844.pdf                                                                                                                                                                                                                                       |
| Spain        | National Health Survey                                                           | Absent                             |  | 2017 | 2011-12<br>2006<br>2003 |  |                                                                                                                                                                                                                                                                                         |

|                                   |                                 |         |                                                                            |                              |              |                                                                                                                                                                                                                                                                   |                                                                                                                                                                                                                                                                                                                                                                                                                                                                                    |
|-----------------------------------|---------------------------------|---------|----------------------------------------------------------------------------|------------------------------|--------------|-------------------------------------------------------------------------------------------------------------------------------------------------------------------------------------------------------------------------------------------------------------------|------------------------------------------------------------------------------------------------------------------------------------------------------------------------------------------------------------------------------------------------------------------------------------------------------------------------------------------------------------------------------------------------------------------------------------------------------------------------------------|
| Switzerland                       | Swiss Health Survey             | Present | 12 month use                                                               | 2017                         | 2012<br>2007 | How often have you been to one of the following specialists in the last 12 months:<br>Naturopath                                                                                                                                                                  | Available from the Swiss Federal Statistical Office<br><a href="http://www.bfs.admin.ch/bfs/portal/de/index/infothek/erhebungen__quelle/blank/blank/ess/04.html">http://www.bfs.admin.ch/bfs/portal/de/index/infothek/erhebungen__quelle/blank/blank/ess/04.html</a><br><br>2012 and 2007 data reported here:<br><a href="https://journals.plos.org/plosone/article?id=10.1371/journal.pone.0141985">https://journals.plos.org/plosone/article?id=10.1371/journal.pone.0141985</a> |
| United Kingdom - England          | Health Survey for England (HSE) | Absent  |                                                                            | 2019                         | Annually     |                                                                                                                                                                                                                                                                   | <a href="https://digital.nhs.uk/data-and-information/publications/statistical/health-survey-for-england/2019">https://digital.nhs.uk/data-and-information/publications/statistical/health-survey-for-england/2019</a>                                                                                                                                                                                                                                                              |
| United Kingdom - Scotland         | Scottish Health Survey          | Absent  | By health condition, 12 month use                                          | 2020                         | Annually     | Have you received any treatment advice for >insert condition< from any of the people on this card:<br>Other alternative medicine professional                                                                                                                     | <a href="https://beta.ukdataservice.ac.uk/datacatalogue/studies/study?id=8737#!/documentation">https://beta.ukdataservice.ac.uk/datacatalogue/studies/study?id=8737#!/documentation</a>                                                                                                                                                                                                                                                                                            |
| United Kingdom - Wales            | National Survey for Wales       | Absent  | By health condition, 12 month use<br><br>Non-GP primary care, 12 month use | Rolling (monthly interviews) |              | In the last 12 months, which of these kinds of treatment or management have you had for >insert condition<:<br>Complementary therapies (e.g. acupuncture, massage)<br><br>In the last 12 months, which of these services have you used for yourself:<br>Osteopath | <a href="https://gov.wales/national-survey-wales-questionnaires">https://gov.wales/national-survey-wales-questionnaires</a>                                                                                                                                                                                                                                                                                                                                                        |
| United Kingdom - Northern Ireland | Health Survey Northern Ireland  | Absent  |                                                                            | 2019-20                      | Annually     |                                                                                                                                                                                                                                                                   | <a href="https://www.data-archive.ac.uk/home">https://www.data-archive.ac.uk/home</a>                                                                                                                                                                                                                                                                                                                                                                                              |

1  
2  
3  
4  
5  
6  
7  
8  
9  
10  
11  
12  
13  
14  
15  
16  
17  
18  
19  
20  
21  
22  
23  
24  
25  
26  
27  
28  
29  
30  
31  
32  
33  
34  
35  
36  
37  
38  
39  
40  
41  
42  
43  
44  
45  
46

|                                   |                                                                                                                                                       |                            |                           |         |                                        |                                                                                                                  |                                                                                                                                                                                                                                                                                    |
|-----------------------------------|-------------------------------------------------------------------------------------------------------------------------------------------------------|----------------------------|---------------------------|---------|----------------------------------------|------------------------------------------------------------------------------------------------------------------|------------------------------------------------------------------------------------------------------------------------------------------------------------------------------------------------------------------------------------------------------------------------------------|
| United Kingdom - Northern Ireland | Northern Ireland Life and Times Survey (I don't think this is actually a government survey - run by Queen's University Belfast and Ulster University) | Present - but only in 2005 | Use ever                  | 2005    | Annually, but CAM only covered in 2005 | Have you ever used naturpathy?                                                                                   | <a href="https://www.ark.ac.uk/nilt/datasets/">https://www.ark.ac.uk/nilt/datasets/</a><br><a href="https://www.ark.ac.uk/nilt/2005/Complementary_Medicine/COMTH8.html">https://www.ark.ac.uk/nilt/2005/Complementary_Medicine/COMTH8.html</a>                                     |
| Uruguay                           | Uruguay Continuous Household Survey                                                                                                                   | Absent                     |                           | 2020    | Annually                               |                                                                                                                  | <a href="https://www.ine.gub.uy/encuesta-continua-de-hogares1">https://www.ine.gub.uy/encuesta-continua-de-hogares1</a>                                                                                                                                                            |
| USA                               | National Health Interview Survey - CAM Supplement                                                                                                     | Present                    | 12 month use              | 2012    | 2007<br>2002                           |                                                                                                                  | <a href="https://www.cdc.gov/nchs/nhis/data-questionnaires-documentation.htm">https://www.cdc.gov/nchs/nhis/data-questionnaires-documentation.htm</a><br><a href="https://www.ncbi.nlm.nih.gov/pmc/articles/PMC4573565/">https://www.ncbi.nlm.nih.gov/pmc/articles/PMC4573565/</a> |
| Zambia                            | DHS Demographic and Health Survey                                                                                                                     | Absent                     |                           | 2018-19 |                                        |                                                                                                                  | <a href="https://microdata.worldbank.org/index.php/catalog/3597">https://microdata.worldbank.org/index.php/catalog/3597</a>                                                                                                                                                        |
| <b>ASSOCIATE MEMBERS</b>          |                                                                                                                                                       |                            |                           |         |                                        |                                                                                                                  |                                                                                                                                                                                                                                                                                    |
| Ireland                           | SLÁN - Survey of Lifestyle, Attitudes and Nutrition                                                                                                   | Absent                     | Use ever and 12 month use | 2007    | 2002<br>1998                           | Have you ever attended an alternative/complementary practitioner? (e.g. acupuncturist, homeopath, reflexologist) | <a href="https://www.ucd.ie/issda/data/surveyonlifestyleandattitudestonutritionslan/">https://www.ucd.ie/issda/data/surveyonlifestyleandattitudestonutritionslan/</a>                                                                                                              |
| Ireland                           | Healthy Ireland                                                                                                                                       | Absent                     |                           | 2018    | 2017<br>2016<br>2015                   |                                                                                                                  | <a href="https://www.ucd.ie/issda/data/healthyireland/">https://www.ucd.ie/issda/data/healthyireland/</a>                                                                                                                                                                          |

|                            |                                                                                                                                                                                                                                                                                                                                                                                          |        |              |         |                     |                                                                                                                                                                                                                                                                                                                                                                                        |                                                                                                                                                                                                                       |
|----------------------------|------------------------------------------------------------------------------------------------------------------------------------------------------------------------------------------------------------------------------------------------------------------------------------------------------------------------------------------------------------------------------------------|--------|--------------|---------|---------------------|----------------------------------------------------------------------------------------------------------------------------------------------------------------------------------------------------------------------------------------------------------------------------------------------------------------------------------------------------------------------------------------|-----------------------------------------------------------------------------------------------------------------------------------------------------------------------------------------------------------------------|
| Norway                     | HUNT - The Trondelag Health Study<br><br>(Norway also has research centre - NAFKAM - which conducts national surveys on CAM, but they don't cover naturopathy in their list of professions <a href="https://nafkam.no/en/report-use-complementary-and-alternative-medicine-cam-norway-2018">https://nafkam.no/en/report-use-complementary-and-alternative-medicine-cam-norway-2018</a> ) | Absent | 12 month use |         |                     | HUNT 2 - During the last 12 months, have you visited any of the following: Other treatment provider (naturopath, reflexologist....)<br><br>HUNT 3, CAM suppl - How many times in the last 12 months have you been to an alternative practitioner? Which type of alternative treatment did you receive and who did you receive the treatment from?: Other type of alternative treatment | <a href="https://www.ntnu.edu/hunt/research">https://www.ntnu.edu/hunt/research</a><br><a href="https://www.ntnu.edu/hunt/data/que">https://www.ntnu.edu/hunt/data/que</a>                                            |
| Singapore                  | National Population Health Survey                                                                                                                                                                                                                                                                                                                                                        | Absent |              | 2018-19 | 2016-17             |                                                                                                                                                                                                                                                                                                                                                                                        | <a href="https://www.moh.gov.sg/docs/librariesprovider5/default-document-library/nphs-2019-survey-report.pdf">https://www.moh.gov.sg/docs/librariesprovider5/default-document-library/nphs-2019-survey-report.pdf</a> |
| Singapore                  | National Health Surveillance Survey                                                                                                                                                                                                                                                                                                                                                      | Absent |              | 2007    | 2001                |                                                                                                                                                                                                                                                                                                                                                                                        | <a href="https://www.singstat.gov.sg/find-data/search-by-theme/society/health/latest-data">https://www.singstat.gov.sg/find-data/search-by-theme/society/health/latest-data</a>                                       |
| Singapore                  | Singapore National Health Survey                                                                                                                                                                                                                                                                                                                                                         | Absent |              | 2010    | 2004<br>1998        |                                                                                                                                                                                                                                                                                                                                                                                        | <a href="https://www.singstat.gov.sg/find-data/search-by-theme/society/health/latest-data">https://www.singstat.gov.sg/find-data/search-by-theme/society/health/latest-data</a>                                       |
| <b>EDUCATIONAL MEMBERS</b> |                                                                                                                                                                                                                                                                                                                                                                                          |        |              |         |                     |                                                                                                                                                                                                                                                                                                                                                                                        |                                                                                                                                                                                                                       |
| Czech Republic             | HELEN (Health, Lifestyle and Environment) Study                                                                                                                                                                                                                                                                                                                                          | Absent |              | 2014    | Annually since 2003 |                                                                                                                                                                                                                                                                                                                                                                                        | <a href="http://www.szu.cz/publikace/studie-helen?lang=1">http://www.szu.cz/publikace/studie-helen?lang=1</a>                                                                                                         |
| Czech Republic             | World Health Survey                                                                                                                                                                                                                                                                                                                                                                      | Absent |              | 2003    |                     |                                                                                                                                                                                                                                                                                                                                                                                        | <a href="https://microdata.worldbank.org/index.php/catalog/1703">https://microdata.worldbank.org/index.php/catalog/1703</a>                                                                                           |
| Ghana                      | DHS Demographic and Health Survey                                                                                                                                                                                                                                                                                                                                                        | Absent |              | 2017    | 2014                |                                                                                                                                                                                                                                                                                                                                                                                        | <a href="https://dhsprogram.com/methodology/survey/survey-display-506.cfm">https://dhsprogram.com/methodology/survey/survey-display-506.cfm</a>                                                                       |

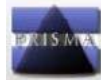

## PRISMA 2020 Checklist

| Section and Topic             | Item # | Checklist item                                                                                                                                                                                                                                                                                       | Location where item is reported |
|-------------------------------|--------|------------------------------------------------------------------------------------------------------------------------------------------------------------------------------------------------------------------------------------------------------------------------------------------------------|---------------------------------|
| <b>TITLE</b>                  |        |                                                                                                                                                                                                                                                                                                      |                                 |
| Title                         | 1      | Identify the report as a systematic review.                                                                                                                                                                                                                                                          | P1                              |
| <b>ABSTRACT</b>               |        |                                                                                                                                                                                                                                                                                                      |                                 |
| Abstract                      | 2      | See the PRISMA 2020 for Abstracts checklist.                                                                                                                                                                                                                                                         | P2 (compliant)                  |
| <b>INTRODUCTION</b>           |        |                                                                                                                                                                                                                                                                                                      |                                 |
| Rationale                     | 3      | Describe the rationale for the review in the context of existing knowledge.                                                                                                                                                                                                                          | P3                              |
| Objectives                    | 4      | Provide an explicit statement of the objective(s) or question(s) the review addresses.                                                                                                                                                                                                               | P3                              |
| <b>METHODS</b>                |        |                                                                                                                                                                                                                                                                                                      |                                 |
| Eligibility criteria          | 5      | Specify the inclusion and exclusion criteria for the review and how studies were grouped for the syntheses.                                                                                                                                                                                          | P4                              |
| Information sources           | 6      | Specify all databases, registers, websites, organisations, reference lists and other sources searched or consulted to identify studies. Specify the date when each source was last searched or consulted.                                                                                            | P4                              |
| Search strategy               | 7      | Present the full search strategies for all databases, registers and websites, including any filters and limits used.                                                                                                                                                                                 | Table 2                         |
| Selection process             | 8      | Specify the methods used to decide whether a study met the inclusion criteria of the review, including how many reviewers screened each record and each report retrieved, whether they worked independently, and if applicable, details of automation tools used in the process.                     | P4                              |
| Data collection process       | 9      | Specify the methods used to collect data from reports, including how many reviewers collected data from each report, whether they worked independently, any processes for obtaining or confirming data from study investigators, and if applicable, details of automation tools used in the process. | P4                              |
| Data items                    | 10a    | List and define all outcomes for which data were sought. Specify whether all results that were compatible with each outcome domain in each study were sought (e.g. for all measures, time points, analyses), and if not, the methods used to decide which results to collect.                        | P4                              |
|                               | 10b    | List and define all other variables for which data were sought (e.g. participant and intervention characteristics, funding sources). Describe any assumptions made about any missing or unclear information.                                                                                         | P4                              |
| Study risk of bias assessment | 11     | Specify the methods used to assess risk of bias in the included studies, including details of the tool(s) used, how many reviewers assessed each study and whether they worked independently, and if applicable, details of automation tools used in the process.                                    | P4-5                            |
| Effect measures               | 12     | Specify for each outcome the effect measure(s) (e.g. risk ratio, mean difference) used in the synthesis or presentation of results.                                                                                                                                                                  | P4-5                            |
| Synthesis methods             | 13a    | Describe the processes used to decide which studies were eligible for each synthesis (e.g. tabulating the study intervention characteristics and comparing against the planned groups for each synthesis (item #5)).                                                                                 | P4-5                            |
|                               | 13b    | Describe any methods required to prepare the data for presentation or synthesis, such as handling of missing summary statistics, or data conversions.                                                                                                                                                | P4-5                            |
|                               | 13c    | Describe any methods used to tabulate or visually display results of individual studies and syntheses.                                                                                                                                                                                               | P4-5                            |
|                               | 13d    | Describe any methods used to synthesize results and provide a rationale for the choice(s). If meta-analysis was performed, describe the model(s), method(s) to identify the presence and extent of statistical heterogeneity, and software package(s) used.                                          | P4-5                            |
|                               | 13e    | Describe any methods used to explore possible causes of heterogeneity among study results (e.g. subgroup analysis, meta-regression).                                                                                                                                                                 | P4-5                            |
|                               | 13f    | Describe any sensitivity analyses conducted to assess robustness of the synthesized results.                                                                                                                                                                                                         | P4-5                            |
| Reporting bias assessment     | 14     | Describe any methods used to assess risk of bias due to missing results in a synthesis (arising from reporting biases).                                                                                                                                                                              | P4                              |
| Certainty assessment          | 15     | Describe any methods used to assess certainty (or confidence) in the body of evidence for an outcome.                                                                                                                                                                                                | P4-5                            |



## PRISMA 2020 Checklist

1  
2  
3  
4  
5  
6  
7  
8  
9  
10  
11  
12  
13  
14  
15  
16  
17  
18  
19  
20  
21  
22  
23  
24  
25  
26  
27  
28  
29  
30  
31  
32  
33  
34  
35  
36  
37  
38  
39  
40  
41  
42  
43  
44  
45  
46  
47

| Section and Topic                              | Item # | Checklist item                                                                                                                                                                                                                                                                       | Location where item is reported |
|------------------------------------------------|--------|--------------------------------------------------------------------------------------------------------------------------------------------------------------------------------------------------------------------------------------------------------------------------------------|---------------------------------|
| <b>RESULTS</b>                                 |        |                                                                                                                                                                                                                                                                                      |                                 |
| Study selection                                | 16a    | Describe the results of the search and selection process, from the number of records identified in the search to the number of studies included in the review, ideally using a flow diagram.                                                                                         | P5                              |
|                                                | 16b    | Cite studies that might appear to meet the inclusion criteria, but which were excluded, and explain why they were excluded.                                                                                                                                                          | Supplementary File 1            |
| Study characteristics                          | 17     | Cite each included study and present its characteristics.                                                                                                                                                                                                                            | P5-6 & Tables 3&4               |
| Risk of bias in studies                        | 18     | Present assessments of risk of bias for each included study.                                                                                                                                                                                                                         | P6 & Table 5                    |
| Results of individual studies                  | 19     | For all outcomes, present, for each study: (a) summary statistics for each group (where appropriate) and (b) an effect estimate and its precision (e.g. confidence/credible interval), ideally using structured tables or plots.                                                     | Table 3 & 4                     |
| Results of syntheses                           | 20a    | For each synthesis, briefly summarise the characteristics and risk of bias among contributing studies.                                                                                                                                                                               | P6-7                            |
|                                                | 20b    | Present results of all statistical syntheses conducted. If meta-analysis was done, present for each the summary estimate and its precision (e.g. confidence/credible interval) and measures of statistical heterogeneity. If comparing groups, describe the direction of the effect. | P6-7                            |
|                                                | 20c    | Present results of all investigations of possible causes of heterogeneity among study results.                                                                                                                                                                                       | P6-7                            |
|                                                | 20d    | Present results of all sensitivity analyses conducted to assess the robustness of the synthesized results.                                                                                                                                                                           | n/a                             |
| Reporting biases                               | 21     | Present assessments of risk of bias due to missing results (arising from reporting biases) for each synthesis assessed.                                                                                                                                                              | P7                              |
| Certainty of evidence                          | 22     | Present assessments of certainty (or confidence) in the body of evidence for each outcome assessed.                                                                                                                                                                                  | n/a                             |
| <b>DISCUSSION</b>                              |        |                                                                                                                                                                                                                                                                                      |                                 |
| Discussion                                     | 23a    | Provide a general interpretation of the results in the context of other evidence.                                                                                                                                                                                                    | P7-9                            |
|                                                | 23b    | Discuss any limitations of the evidence included in the review.                                                                                                                                                                                                                      | P9                              |
|                                                | 23c    | Discuss any limitations of the review processes used.                                                                                                                                                                                                                                | P9                              |
|                                                | 23d    | Discuss implications of the results for practice, policy, and future research.                                                                                                                                                                                                       | P7-9                            |
| <b>OTHER INFORMATION</b>                       |        |                                                                                                                                                                                                                                                                                      |                                 |
| Registration and protocol                      | 24a    | Provide registration information for the review, including register name and registration number, or state that the review was not registered.                                                                                                                                       | P4                              |
|                                                | 24b    | Indicate where the review protocol can be accessed, or state that a protocol was not prepared.                                                                                                                                                                                       | P4                              |
|                                                | 24c    | Describe and explain any amendments to information provided at registration or in the protocol.                                                                                                                                                                                      | n/a                             |
| Support                                        | 25     | Describe sources of financial or non-financial support for the review, and the role of the funders or sponsors in the review.                                                                                                                                                        | n/a                             |
| Competing interests                            | 26     | Declare any competing interests of review authors.                                                                                                                                                                                                                                   | n/a                             |
| Availability of data, code and other materials | 27     | Report which of the following are publicly available and where they can be found: template data collection forms; data extracted from included studies; data used for all analyses; analytic code; any other materials used in the review.                                           | n/a                             |

From: Page MJ, McKenzie JE, Bossuyt PM, Boutron I, Hoffmann TC, Mulrow CD, et al. The PRISMA 2020 statement: an updated guideline for reporting systematic reviews. *BMJ* 2021;372:n71. doi: 10.1136/bmj.n71

For peer review only - <http://bmjopen.bmj.com/site/about/guidelines.xhtml>  
For more information, visit: <http://www.prisma-statement.org/>
