# Supplementary material for: International prevalence of consultation with a naturopathic practitioner: a systematic review and meta-analysis
Source: PubMed Central journal article supplement — BMJ Open. 2022 Jul 25;12(7):e056075. doi: 10.1136/bmjopen-2021-056075 (PMC9328102; doi:10.1136/bmjopen-2021-056075), 2022-07-25
Supplement: bmjopen-2021-056075supp001.pdf [file bmjopen-2021-056075supp001.pdf]

## Supplementary File 1: List of Excluded articles and reasons for exclusion

| Title                                                                                                                                                               | Authors                                                                            | Publi shed Year | Journal                                                | V ol u m e | Issue  | Page s  | Notes                                                         | Tags |
|---------------------------------------------------------------------------------------------------------------------------------------------------------------------|------------------------------------------------------------------------------------|-----------------|--------------------------------------------------------|------------|--------|---------|---------------------------------------------------------------|------|
| <b>Trends in the use of complementary health approaches among adults: United States, 2002-2012</b>                                                                  | Clarke, T. C.; Black, L. I.; Stussman, B. J.; Barnes, P. M.; Nahin, R. L.          | 2015            | National health statistics reports                     |            | 79     | Jan-16  | Exclusion reason: Does not report naturopathic consultations  |      |
| <b>The prevalence and experience of Australian naturopaths and Western herbalists working within community pharmacies</b>                                           |                                                                                    | 2011            | Journal of the Australian Traditional-Medicine Society | 17         | 4      | 240-240 | Exclusion reason: Duplicate                                   |      |
| <b>Why seek complementary medicine? An observational study in homeopathic, acupunctural, naturopathic and mainstream medical practice</b>                           | Van Dulmen, S.; De Groot, J.; Koster, D.; Heiligers, P. J. M.                      | 2010            | Journal of Complementary and Integrative Medicine      | 7          | 1      | 20      | Exclusion reason: Does not report naturopathic consultations; |      |
| <b>The Australian Complementary Medicine Workforce: A Profile of 1,306 Practitioners from the PRACI Study</b>                                                       | Steel, A.; Leach, M.; Wardle, J.; Sibbritt, D.; Schloss, J.; D. Iezel H; Adams, J. | 2018            | Journal of Alternative and Complementary Medicine      | 24         | 4      | 385-394 | Exclusion reason: Does not report naturopathic consultations; |      |
| <b>Primary Care in Oregon: The Naturopathic Physician's Perspective</b>                                                                                             | Linn, Brooke L.; Metcalf, Gary                                                     | 2018            |                                                        |            | 109797 | 231     | Exclusion reason: Not original research;                      |      |
| <b>Characteristics of the Australian complementary and alternative medicine (CAM) workforce</b>                                                                     | Leach, Matthew J.; McIntyre, Erica; Frawley, Jane                                  | 2014            | Australian Journal of Herbal Medicine                  | 26         | 2      | 58-65   | Exclusion reason: Does not report naturopathic consultations; |      |
| <b>[Which complementary and alternative medicine modalities are integrated within Israeli healthcare organizations and do they match the public's preferences?]</b> | Keshet, Y.; Ben-Arye, E.                                                           | 2011            | Harefuah                                               | 15         | 8      | 635-689 | Exclusion reason: Does not report naturopathic consultations; |      |
| <b>Complementary medical health services: a cross sectional descriptive analysis of a Canadian naturopathic teaching clinic</b>                                     | Kennedy, Deborah A.; Bernhardt, Bob; Snyder, Tara; Bancu, Viviana; Cooley, Kieran  | 2015            | BMC Complementary & Alternative Medicine               | 15         | 1      | 1-Oct   | Exclusion reason: Wrong outcomes;                             |      |
| <b>Characteristics and job satisfaction of general practitioners using complementary and alternative medicine in Germany--is there a pattern?</b>                   | Joos, Stefanie; Musselmann, Berthold; Szecsenyi, Joachim; Goetz, Katja             | 2011            | BMC Complementary and Alternative Medicine             | 11         |        | 131     | Exclusion reason: Wrong outcomes;                             |      |
| <b>Naturopathic practice at North American academic institutions: Description of 300,483 visits and comparison to conventional primary care</b>                     | Chamberlin, S. R.; Oberg, E.; Hanes, D. A.; Calabrese, C.                          | 2014            | Integrative Medicine Insights                          |            | 9      | Jul-15  | Exclusion reason: Wrong outcomes;                             |      |
| <b>Complementary and alternative medicine among Filipinos: Prevalence, costs and patterns of use</b>                                                                | Morfe, J. H. D.; Lim, V. S.                                                        | 2013            | Phillippine Journal of Internal Medicine               | 51         | 4      |         | Exclusion reason: Wrong study design;                         |      |

|                                                                                                                               |                                                                                               |      |                                                        |    |    |                        |                                                               |
|-------------------------------------------------------------------------------------------------------------------------------|-----------------------------------------------------------------------------------------------|------|--------------------------------------------------------|----|----|------------------------|---------------------------------------------------------------|
| <b>The prevalence and experience of Australian naturopaths and Western herbalists working within community pharmacies</b>     | Braun, L. A.; Spitzer, O.; Tiralongo, E.; Wilkinson, J. M.; Bailey, M.; Poole, S.; Dooley, M. | 2011 | BMC Complementary and Alternative Medicine             | 11 | 41 | (23 May 2011)          | Exclusion reason: Wrong outcomes;                             |
| <b>Integration of complementary and alternative medicine into family practices in Germany: Results of a national survey</b>   | Joos, S.; Musselmann, B.; Szecsenyi, J.                                                       | 2011 | Evidence-based Complementary and Alternative Medicine  | 20 | 11 | 495 813                | Exclusion reason: Wrong outcomes;                             |
| <b>USE OF COMPLEMENTARY AND ALTERNATIVE MEDICINE IN GEORGIA</b>                                                               | Nadareishvili, I.; Lunze, K.; Tabagari, N.; Beraia, A.; Pkhakadze, G.                         | 2017 | Georgian Medical News                                  |    |    | 272 157-164            | Exclusion reason: Does not report naturopathic consultations; |
| <b>Complementary and alternative health care in Israel</b>                                                                    | Shuval, J. T.; Averbuch, E.                                                                   | 2012 | Israel Journal of Health Policy Research               | 1  | 1  | 7                      | Exclusion reason: Does not report naturopathic consultations; |
| <b>WHO global report on traditional and complementary medicine 2019</b>                                                       | World Health Organisation                                                                     | 2019 |                                                        |    |    |                        | Exclusion reason: Does not report naturopathic consultations; |
| <b>TRADITIONAL AND COMPLEMENTARY MEDICINE IN PRIMARY HEALTH CARE</b>                                                          | World Health Organisation                                                                     | 2018 |                                                        |    |    | WHO/HIS/SDS/2018.37    | Exclusion reason: Does not report naturopathic consultations; |
| <b>The Philippines Health System Review</b>                                                                                   | World Health Organisation                                                                     | 2018 | Health Systems in Transition                           | 8  | 2  | 352                    | Exclusion reason: Does not report naturopathic consultations; |
| <b>SURGICAL WORKFORCE IN INDIA</b>                                                                                            | World Health Organisation                                                                     | 2015 |                                                        |    |    |                        | Exclusion reason: Does not report naturopathic consultations; |
| <b>The prevalence and experience of Australian naturopaths and Western herbalists working within community pharmacies. B</b>  |                                                                                               | 2011 | Journal of the Australian Traditional-Medicine Society | 17 | 3  | 167-168                | Exclusion reason: Duplicate;                                  |
| <b>Use of traditional medicine and complementary and alternative medicine in Taiwan: a multilevel analysis</b>                | Yeh, Mei-Ling; Lin, Kuan-Chia; Chen, Hsing-Hsia; Wang, Yu-Jen; Huang, Yu-Chiao                | 2015 | Holistic Nursing Practice                              | 29 | 2  | 87-95                  | Exclusion reason: Does not report naturopathic consultations; |
| <b>Benchmarks for training in traditional /complementary and alternative medicine: benchmarks for training in naturopathy</b> | World Health Organisation                                                                     | 2010 |                                                        |    |    |                        | Exclusion reason: Not original research;                      |
| <b>Malaysia health system review</b>                                                                                          | World Health Organisation                                                                     | 2012 | Health Systems in Transition                           | 2  |    | ISBN 978 92 9061 584 2 | Exclusion reason: Not original research;                      |

|                                                                                                                                                                                             |                                                                                                      |      |                                                 |    |                        |             |                                                                      |
|---------------------------------------------------------------------------------------------------------------------------------------------------------------------------------------------|------------------------------------------------------------------------------------------------------|------|-------------------------------------------------|----|------------------------|-------------|----------------------------------------------------------------------|
| <b>New Zealand health system review</b>                                                                                                                                                     | World Health Organisation                                                                            | 2014 | Health Systems in Transition                    | 4  |                        | 272         | Exclusion reason: Not original research;                             |
| <b>The Regional Strategy for Traditional Medicine in the Western Pacific (2011-2020)</b>                                                                                                    | World Health Organisation                                                                            | 2012 |                                                 |    | ISBN 978 92 9061 559 0 | 71          | Exclusion reason: Not original research;                             |
| <b>WHO traditional medicine strategy: 2014-2023.</b>                                                                                                                                        | World Health Organisation                                                                            | 2013 |                                                 |    |                        | 78          | Exclusion reason: Not original research;                             |
| <b>Two-Thirds of Survey Respondents in Southern Sweden Used Complementary or Alternative Medicine in 2015</b>                                                                               | Wemrell, M.; Merlo, J.; Mulinari, S.; Hornborg, A. C.                                                | 2017 | Complementary medicine research                 | 24 | 5                      | 302-309     | Exclusion reason: Does not report naturopathic consultations;        |
| <b>Determinants for the Use of Complementary and Alternative Medicine: Results from a National Study</b>                                                                                    | Watts, Kristen Allen; Turner, Lori W.                                                                | 2018 |                                                 |    |                        | 109346 35   | 307<br>Exclusion reason: Does not report naturopathic consultations; |
| <b>Distribution of complementary and alternative medicine (CAM) providers in rural New South Wales, Australia: a step towards explaining high CAM use in rural health?</b>                  | Wardle, Jon; Adams, Jon; Magalhaes, Ricardo J. Soares; Sibbritt, David                               | 2011 | The Australian journal of rural health          | 19 | 4                      | 197-204     | Exclusion reason: Does not report naturopathic consultations;        |
| <b>The interface with naturopathy in rural primary health care: A survey of referral practices of general practitioners in rural and regional New South Wales, Australia</b>                | Wardle, J. L.; Sibbritt, D. W.; Adams, J.                                                            | 2014 | BMC Complementary and Alternative Medicine      | 14 |                        | 238         | Exclusion reason: Does not report naturopathic consultations;        |
| <b>Mapping the natural health landscape: New Zealand-based CAM professionals survey</b>                                                                                                     | Vempati, R.; Dunn, J.; Cottingham, P.; Sibbritt, D.; Adams, J.                                       | 2012 | BMC Complementary and Alternative Medicine      | 12 | SUPPL. 1               |             | Exclusion reason: Conference abstract only;                          |
| <b>Use of Complementary and Alternative Medicine in Bayamon, Puerto Rico</b>                                                                                                                | Torres-Zeno, R. E.; Rios-Motta, R.; Rodriguez-Sanchez, Y.; Miranda-Massari, J. R.; Marin-Centeno, H. | 2016 | Puerto Rico Health Sciences Journal             | 35 | 2                      | 69-75       | Exclusion reason: Does not report naturopathic consultations;        |
| <b>Attitude of Conventional and CAM Physicians Toward CAM in India</b>                                                                                                                      | Telles, Shirley; Gaur, Vaishali; Sharma, Sachin; Balkrishna, Acharya                                 | 2011 | Journal of Alternative & Complementary Medicine | 17 | 11                     | 106 9-107 3 | Exclusion reason: Does not report naturopathic consultations;        |
| <b>Wellness versus treatment? Complementary and integrative healthcare (CIH) in the 2007 national health interview survey (NHIS)</b>                                                        | Stussman, B.; Alekel, L.; Nahin, R.; Edwards, E.; Barnes, P.                                         | 2012 | BMC Complementary and Alternative Medicine      | 12 | SUPPL. 1               |             | Exclusion reason: Conference abstract only;                          |
| <b>Generational differences in complementary medicine use in young Australian women: Repeated cross-sectional dataset analysis from the Australian longitudinal study on women's health</b> | Steel, A.; Munk, N.; Wardle, J.; Adams, J.; Sibbritt, D.; Lauche, R.                                 | 2019 | Complementary Therapies in Medicine             | 43 |                        | 66-72       | Exclusion reason: Does not report naturopathic consultations;        |
| <b>Complementary and alternative medicine: attitudes, knowledge and use among surgeons and anaesthesiologists in Hungary</b>                                                                | Soos, Sandor Arpad; Jeszenoi, Norbert; Darvas, Katalin; Harsanyi, Laszlo                             | 2016 | BMC Complementary and Alternative Medicine      | 16 | 1                      | 443         | Exclusion reason: Does not report                                    |

|                                                                                                                                                                                                                         |                                                                                                  |      |                                                               |    |          |         |  |                                                               |
|-------------------------------------------------------------------------------------------------------------------------------------------------------------------------------------------------------------------------|--------------------------------------------------------------------------------------------------|------|---------------------------------------------------------------|----|----------|---------|--|---------------------------------------------------------------|
|                                                                                                                                                                                                                         |                                                                                                  |      |                                                               |    |          |         |  | naturopathic consultations;                                   |
| <b>Complementary and alternative medicine: contemporary trends and issues</b>                                                                                                                                           | Smith, Joanna M.; John Sullivan, S.; David Baxter, G.                                            | 2011 | Physical Therapy Reviews                                      | 16 | 2        | 91-95   |  | Exclusion reason: Not original research;                      |
| <b>Use of complementary and alternative medicine in the population of Kedah Darul Aman, Malaysia</b>                                                                                                                    | Sivadasan, S.; Ali, A. N.; Lin, L. W.; Balakrishnan, D.; Ramachandran, S.; Dhanaraj, S. A.       | 2014 | International Journal of Pharmaceutical Sciences and Research | 5  | 4        | 126-127 |  | Exclusion reason: Does not report naturopathic consultations; |
| <b>Epidemiology of the use of complementary and alternative medicine in central area of Sao Paulo</b>                                                                                                                   | Simoës, O.; Castro, B.                                                                           | 2013 | European Journal of Epidemiology                              | 28 | 1 SUPPL. | S219    |  | Exclusion reason: Conference abstract only;                   |
| <b>[Complementary and alternative medicine services in Colombia]</b>                                                                                                                                                    | Rojas-Rojas, Alejandra                                                                           | 2012 | Servicios de medicina alternativa en Colombia.                | 14 | 3        | 470-7   |  | Exclusion reason: Does not report naturopathic consultations; |
| <b>Composition and distribution of the health workforce in India: estimates based on data from the National Sample Survey</b>                                                                                           | Rao, K. D.; Shahrawat, R.; Bhatnagar, A.                                                         | 2016 | WHO South-East Asia journal of public health                  | 5  | 2        | 133-140 |  | Exclusion reason: Does not report naturopathic consultations; |
| <b>Prevalence of Complementary and Alternative Medicine Use in the General Population in the Czech Republic</b>                                                                                                         | Pokladnikova, J.; Selke-Krulichova, I.                                                           | 2016 | Forschende Komplementarmedizin (2006)                         | 23 | 1        | 22-28   |  | Exclusion reason: Does not report naturopathic consultations; |
| <b>Regional variation in use of complementary health approaches by U.S. adults</b>                                                                                                                                      | Peregoy, J. A.; Clarke, T. C.; Jones, L. I.; Stussman, B. J.; Nahin, R. L.                       | 2014 | NCHS Data Brief                                               |    | 146      | 1-Aug   |  | Exclusion reason: Does not report naturopathic consultations; |
| <b>Utilization of traditional and complementary medicine in Indonesia: Results of a national survey in 2014-15</b>                                                                                                      | Pengpid, S.; Peltzer, K.                                                                         | 2018 | Complementary Therapies in Clinical Practice                  | 33 |          | 156-163 |  | Exclusion reason: Does not report naturopathic consultations; |
| <b>Complementary and alternative medicine (CAM) utilization in Texas hospices</b>                                                                                                                                       | Olotu, B.; Brown, C. M.; Lawson, K.; Barner, J. C.                                               | 2012 | Value in Health                                               | 15 | 4        | A25     |  | Exclusion reason: Conference abstract only;                   |
| <b>Complementary and alternative medicine utilization in Texas hospices: Prevalence and challenges</b>                                                                                                                  | Olotu, B.; Brown, C.; Barner, J.; Lawson, K.                                                     | 2012 | Journal of the American Pharmacists Association               | 52 | 2        | 215-216 |  | Exclusion reason: Conference abstract only;                   |
| <b>Experiences and meanings of integration of TCAM (Traditional, Complementary and Alternative Medical) providers in three Indian states: results from a cross-sectional, qualitative implementation research study</b> | Nambiar, D.; Narayan, V. V.; Josyula, L. K.; Porter, J. D. H.; Sathyanarayana, T. N.; Sheikh, K. | 2014 | BMJ Open                                                      | 4  | 11       | e005203 |  | Exclusion reason: Does not report naturopathic consultations; |
| <b>Naturopaths in Ontario, Canada: Geographic patterns in intermediately-sized metropolitan areas and integration implications</b>                                                                                      | Meyer, S. P.                                                                                     | 2017 | Journal of Complementary and Integrative Medicine             | 14 | 1        | 92      |  | Exclusion reason: Does not report                             |

|                                                                                                                                                                                                      |                                                                                                            |      |                                                           |          |              |                       |                                                               |
|------------------------------------------------------------------------------------------------------------------------------------------------------------------------------------------------------|------------------------------------------------------------------------------------------------------------|------|-----------------------------------------------------------|----------|--------------|-----------------------|---------------------------------------------------------------|
|                                                                                                                                                                                                      |                                                                                                            |      |                                                           |          |              |                       | naturopathic consultations;                                   |
| <b>An investigation into the use of complementary and alternative medicine in an urban general practice</b>                                                                                          | McKenna, F.; Killoury, F.                                                                                  | 2010 | Irish Medical Journal                                     | 10<br>3  | 7            |                       | Exclusion reason: Does not report naturopathic consultations; |
| <b>A survey to explore the views and practices of CAM practitioners in the UK</b>                                                                                                                    | Majumdar, A.; Williams, S.; Adams, N.                                                                      | 2012 | BMC Complementary and Alternative Medicine                | 12       | SUPPL.<br>1  |                       | Exclusion reason: Conference abstract only;                   |
| <b>The prevalence of traditional and complementary medicine in the general population in Kashan, Iran, 2014</b>                                                                                      | Lotfi, M. S.; Adib-Hajbaghery, M.; Shahsavarloo, Z. R.; Gandomani, H. S.                                   | 2016 | European Journal of Integrative Medicine                  | 8        | 5            | 661-669               | Exclusion reason: Does not report naturopathic consultations; |
| <b>Examining costs, utilization, and driving factors of complementary and alternative medicine (CAM) services</b>                                                                                    | Lewing, B.; Sansgiry, S. S.                                                                                | 2018 | Value in Health                                           | 21       | Supplement 1 | S97                   | Exclusion reason: Conference abstract only;                   |
| <b>Profiling the Australian Consumer of Complementary and Alternative Medicine: A Secondary Analysis of National Health Survey Data</b>                                                              | Leach, M. J.                                                                                               | 2016 | Alternative therapies in health and medicine              | 22       | 4            | 64-72                 | Exclusion reason: Does not report naturopathic consultations; |
| <b>Complementary and alternative medicine (CAM) as part of primary health care in Germany-comparison of patients consulting general practitioners and CAM practitioners: A cross-sectional study</b> | Krug, K.; Kraus, K. I.; Herrmann, K.; Joos, S.                                                             | 2016 | BMC Complementary and Alternative Medicine                | 16       | 1            | 409                   | Exclusion reason: Does not report naturopathic consultations; |
| <b>Understanding CAM use in Lebanon: Findings from a national survey</b>                                                                                                                             | Kharroubi, S.; Chehab, R. F.; El-Baba, C.; Alameddine, M.; Naja, F.                                        | 2018 | Evidence-based Complementary and Alternative Medicine     | 20<br>18 |              | 416<br>915<br>9       | Exclusion reason: Does not report naturopathic consultations; |
| <b>Use of complementary and alternative medicine in Europe: Health-related and sociodemographic determinants</b>                                                                                     | Kemppainen, Laura M.; Kemppainen, Teemu T.; Reippainen, Jutta A.; Salmenniemi, Suvi T.; Vuolanto, Pia H.   | 2018 | Scandinavian Journal of Public Health                     | 46       | 4            | 448-455               | Exclusion reason: Does not report naturopathic consultations; |
| <b>Complementary and alternative medicine usage in patients for different ailments in rural region of malwa area of punjab: A cross-sectional study</b>                                              | Kaur, K.; Singh, B.; Kaur, G.                                                                              | 2016 | National Journal of Physiology, Pharmacy and Pharmacology | 6        | 5            | 394-398               | Exclusion reason: Does not report naturopathic consultations; |
| <b>Determinants of patients preferring Complementary and Alternative medicine attending public hospitals in Lahore, Pakistan</b>                                                                     | Hussain, A.; Ayesha; Mufti, R. K.; Shahid, M.; Hassan, M. N.; Sultan, T.; Zahid, M. N.; Ali, I.; Iqbal, H. | 2018 | Journal of the Pakistan Medical Association               | 68       | 6            | 914-918               | Exclusion reason: Does not report naturopathic consultations; |
| <b>State and Regional Comparisons of the Use of Complementary Health Approaches: National Health Interview Survey, 2012</b>                                                                          | Jones, Lindsey; Peregoy, Jennifer; Stussman, Barbara; Nahin, Richard                                       | 2014 | Journal of Alternative & Complementary Medicine           | 20       | 5            | A14<br>3-<br>A14<br>3 | Exclusion reason: Conference abstract only;                   |

|                                                                                                                                                                      |                                                                                                                                                                 |      |                                                        |    |          |           |                                                               |
|----------------------------------------------------------------------------------------------------------------------------------------------------------------------|-----------------------------------------------------------------------------------------------------------------------------------------------------------------|------|--------------------------------------------------------|----|----------|-----------|---------------------------------------------------------------|
| <b>Knowledge, attitude and practice of complementary and alternative medicine: A patient's perspective</b>                                                           | Jaiswal, K. M.; Bajait, C. S.; Pimpalkhute, S. A.; Dakhle, G. N.; Sontakke, S. D.; Magdum, A.                                                                   | 2013 | Indian Journal of Pharmacology                         | 45 | SUPPL. 1 | S221      | Exclusion reason: Does not report naturopathic consultations; |
| <b>Use of complementary and alternative medicine within Norwegian hospitals</b>                                                                                      | Jacobsen, R.; Fjell, V. M.; Foss, N.; Kristoffersen, A. E.                                                                                                      | 2015 | BMC Complementary & Alternative Medicine               | 15 | 1        | 1-Jun     | Exclusion reason: Does not report naturopathic consultations; |
| <b>Association between belief and attitude toward preference of complementary alternative medicine use</b>                                                           | Islahudin, F.; Shahdan, I. A.; Mohamad-Samuri, S.                                                                                                               | 2017 | Patient Preference and Adherence                       | 11 |          | 913-918   | Exclusion reason: Does not report naturopathic consultations; |
| <b>Patients' use of CAM: Results from the Health Survey for England 2005</b>                                                                                         | Hunt, K. J.; Ernst, E.                                                                                                                                          | 2010 | Focus on Alternative and Complementary Therapies       | 15 | 2        | 101-103   | Exclusion reason: Does not report naturopathic consultations; |
| <b>The utilization of complementary and alternative medicine in Taiwan: An internet survey using an adapted version of the international questionnaire (I-CAM-Q)</b> | Huang, C. W.; Tran, D. N. H.; Li, T. F.; Sasaki, Y.; Lee, J. A.; Lee, M. S.; Arai, I.; Motoo, Y.; Yukawa, K.; Tsutani, K.; Ko, S. G.; Hwang, S. J.; Chen, F. P. | 2019 | Journal of the Chinese Medical Association             | 82 | 8        | 665-671   | Exclusion reason: Does not report naturopathic consultations; |
| <b>Utilization of complimentary and alternative health services in Iceland</b>                                                                                       | Helgadóttir, B.; Vilhjálmsson, R.; Gunnarsdóttir, T. J.                                                                                                         | 2010 | Laeknabladid                                           | 96 | 4        | 267-273   | Exclusion reason: Does not report naturopathic consultations; |
| <b>The use of complementary and alternative medicine in Iceland: Results from a national health survey</b>                                                           | Gunnarsdóttir, T. J.; Orlygsdóttir, B.; Vilhjálmsson, R.                                                                                                        | 2019 | Scandinavian Journal of Public Health                  |    |          | 1.40 E+15 | Exclusion reason: Does not report naturopathic consultations; |
| <b>The Natural Medicine Workforce in Australia: A National Survey Part 1</b>                                                                                         | Grace, S.; Rogers, S.; Eddey, S.                                                                                                                                | 2013 | Journal of the Australian Traditional-Medicine Society | 19 | 1        | 13-18     | Exclusion reason: Does not report naturopathic consultations; |
| <b>The natural medicine workforce in Australia: A national survey Part 2</b>                                                                                         | Grace, S.; Rogers, S.; Eddey, S.                                                                                                                                | 2013 | Journal of the Australian Traditional-Medicine Society | 19 | 2        | 79-86     | Exclusion reason: Does not report naturopathic consultations; |
| <b>Complementary alternative medicine (CAM) use in Ireland: A secondary analysis of SLAN data</b>                                                                    | Fox, P.; Coughlan, B.; Butler, M.; Kelleher, C.                                                                                                                 | 2010 | Complementary Therapies in Medicine                    | 18 | 2        | 95-103    | Exclusion reason: Does not report naturopathic consultations; |
| <b>Who uses complementary and alternative therapies in regional South Australia? Evidence from the Whyalla Intergenerational Study of Health</b>                     | D'Onise, K.; Haren, M. T.; Misan, G. M. H.; McDermott, R. A.                                                                                                    | 2013 | Australian Health Review                               | 37 | 1        | 104-111   | Exclusion reason: Does not report naturopathic consultations; |

|                                                                                                                                                            |                                                                                                       |      |                                                        |         |       |                       |                                                               |
|------------------------------------------------------------------------------------------------------------------------------------------------------------|-------------------------------------------------------------------------------------------------------|------|--------------------------------------------------------|---------|-------|-----------------------|---------------------------------------------------------------|
| <b>The characteristics, experiences and perceptions of naturopathic and herbal medicine practitioners: results from a national survey in New Zealand</b>   | Cottingham, P.; Adams, J.; Vempati, R.; Dunn, J.; Sibbritt, D.                                        | 2015 | Journal of the Australian Traditional-Medicine Society | 21      | 2     | 130-130               | Exclusion reason: Does not report naturopathic consultations; |
| <b>Integration of complementary and alternative medicine into medical schools in Austria, Germany and Switzerland - Results of a cross-sectional study</b> | Brinkhaus, B.; Witt, C. M.; Jena, S.; Bockelbrink, A.; Ortiz, M.; Willich, S. N.                      | 2011 | Wiener Medizinische Wochenschrift                      | 16<br>1 | 1-Feb | 32-43                 | Exclusion reason: Does not report naturopathic consultations; |
| <b>The use of complementary therapies in Chile: Results from the national health survey 2010-2011</b>                                                      | Bedregal, P.; Passi, A.; Guerra, X.; Chang, M.                                                        | 2016 | Journal of Alternative and Complementary Medicine      | 22      | 6     | A10<br>3-<br>A10<br>4 | Exclusion reason: Conference abstract only;                   |
| <b>Complementary and Alternative Medicine (CAM) among adults in Italy: Use and related satisfaction</b>                                                    | Barbadoro, P.; Chiatti, C.; D'Errico, M. M.; Minelli, A.; Pennacchietti, L.; Ponzio, E.; Prospero, E. | 2011 | European Journal of Integrative Medicine               | 3       | 4     | e31<br>9-<br>e32<br>6 | Exclusion reason: Does not report naturopathic consultations; |
| <b>A preliminary study of complementary and alternative medicine (CAM) practitioners in Singapore</b>                                                      | Ang, S. C.; Wilkinson, J. M.                                                                          | 2013 | Complementary Therapies in Medicine                    | 21      | 1     | 42-49                 | Exclusion reason: Does not report naturopathic consultations; |
| <b>Use of complementary and alternative medicine among asthmatic patients in primary care clinics in Malaysia</b>                                          | Alshagga, M. A.; Al-Dubai, S. A.; Muhamad Faiq, S. S.; Yusuf, A. A.                                   | 2011 | Annals of Thoracic Medicine                            | 6       | 3     | 115-119               | Exclusion reason: Does not report naturopathic consultations; |
| <b>Knowledge, attitude and practice toward complementary and traditional medicine among Kashan health care staff, 2012</b>                                 | Adib-Hajbaghery, M.; Hoseinian, M.                                                                    | 2014 | Complementary Therapies in Medicine                    | 22      | 1     | 126-132               | Exclusion reason: Does not report naturopathic consultations; |
| <b>A survey of complementary and alternative medicine in Iran</b>                                                                                          | Abolhassani, Hassan; Naseri, Mohsen; Mahmoudzadeh, Sanam                                              | 2012 | Chinese Journal of Integrative Medicine                | 18      | 6     | 409-416               | Exclusion reason: Does not report naturopathic consultations; |
