# Supplementary material for: International prevalence of consultation with a naturopathic practitioner: a systematic review and meta-analysis
Source: PubMed Central journal article supplement — BMJ Open. 2022 Jul 25;12(7):e056075. doi: 10.1136/bmjopen-2021-056075 (PMC9328102; doi:10.1136/bmjopen-2021-056075), 2022-07-25
Supplement: bmjopen-2021-056075supp002.pdf [file bmjopen-2021-056075supp002.pdf]

Supplementary File 2: List of national surveys from WNF member countries, with reference to inclusion of items examining naturopathy use

| Country             | Report/survey identified/ located                                                                                                                                                                                                                                              | Inclusion of naturopathy-specific item | Prevalence timeframe | Date last collected | Other dates collected    | Item/s | Data accessibility                                                                                                                                                                                                                                                     |
|---------------------|--------------------------------------------------------------------------------------------------------------------------------------------------------------------------------------------------------------------------------------------------------------------------------|----------------------------------------|----------------------|---------------------|--------------------------|--------|------------------------------------------------------------------------------------------------------------------------------------------------------------------------------------------------------------------------------------------------------------------------|
| <b>FULL MEMBERS</b> |                                                                                                                                                                                                                                                                                |                                        |                      |                     |                          |        |                                                                                                                                                                                                                                                                        |
| Australia           | National Health Survey                                                                                                                                                                                                                                                         | Absent                                 |                      | 2021                |                          |        |                                                                                                                                                                                                                                                                        |
| Belgium             | Health Interview Survey<br><a href="https://his.wiv-isp.be/fr/Documents%20partages/Summ_HC_FR_2018.pdf">https://his.wiv-isp.be/fr/Documents%20partages/Summ_HC_FR_2018.pdf</a>                                                                                                 | Absent                                 |                      | 2018                | Every 2 years from 1997  |        |                                                                                                                                                                                                                                                                        |
| Brazil              | National Health Survey - PNS Table 3.21<br><a href="https://www.ibge.gov.br/en/statistics/social/health/16840-national-survey-of-health.html?=&amp;t=downloads">https://www.ibge.gov.br/en/statistics/social/health/16840-national-survey-of-health.html?=&amp;t=downloads</a> | Absent                                 |                      | 2019                | 2013                     |        | Appears to be available at link<br><a href="https://www.ibge.gov.br/en/statistics/social/health/16840-national-survey-of-health.html?=&amp;t=downloads">https://www.ibge.gov.br/en/statistics/social/health/16840-national-survey-of-health.html?=&amp;t=downloads</a> |
| Canada              | Canadian Health Measures Survey                                                                                                                                                                                                                                                | Absent                                 |                      | 2019                | Every 2 years since 2011 | -      |                                                                                                                                                                                                                                                                        |
| Canada              | Canadian National Health Survey                                                                                                                                                                                                                                                | Absent                                 | -                    | 2016                |                          | -      | CNHS: <a href="https://www.statcan.gc.ca/eng/surveys?MM=1">https://www.statcan.gc.ca/eng/surveys?MM=1</a>                                                                                                                                                              |

|        |                                   |                                                             |              |                         |                          |                                                                                                                                                                                                                                                                                                                                                                                                            |                                                                                                                                                                                                                                                                                                                                                                                                                                                                                                                                                                                                                                                                                                                                                                                                                                                                                                                                                                                                                                                                                                                                                                                                                                  |
|--------|-----------------------------------|-------------------------------------------------------------|--------------|-------------------------|--------------------------|------------------------------------------------------------------------------------------------------------------------------------------------------------------------------------------------------------------------------------------------------------------------------------------------------------------------------------------------------------------------------------------------------------|----------------------------------------------------------------------------------------------------------------------------------------------------------------------------------------------------------------------------------------------------------------------------------------------------------------------------------------------------------------------------------------------------------------------------------------------------------------------------------------------------------------------------------------------------------------------------------------------------------------------------------------------------------------------------------------------------------------------------------------------------------------------------------------------------------------------------------------------------------------------------------------------------------------------------------------------------------------------------------------------------------------------------------------------------------------------------------------------------------------------------------------------------------------------------------------------------------------------------------|
| Canada | National Population Health Survey | Present but combined with other health service (homeopathy) | 12 month use | 2010/11                 | Every 2 years since 1992 | A) People may also use alternative or complementary medicine. In the past 12 months, [have/has] [you/FNAME] seen or talked on the telephone to an alternative health care provider such as an acupuncturist, homeopath or massage therapist about [your/his/her] physical, emotional or mental health?<br>B) Who did you speak to (answer option is "homeopath or naturopath")                             | <a href="https://crdcn.org/datasets/nphs-national-population-health-survey">https://crdcn.org/datasets/nphs-national-population-health-survey</a><br><a href="https://crdcn.org/research">https://crdcn.org/research</a><br><br>Application process for academic researchers<br>Researchers wishing to access the RDC should create an account on the Statistics Canada Microdata Access Platform and follow the steps to create a new proposal. The proposal is evaluated by Statistics Canada for feasibility before access can be granted. In addition, if you are a student, your thesis supervisor must write a letter in support of your RDC application and join the application as a co-investigator. For other academic users, a completed peer-review may be required. The review must be conducted by a tenured faculty-member at an accredited Canadian university. Researchers who are required to submit such a peer review can source their own peer reviewer, or contact CRDCN for assistance if they are unable to find a suitable candidate.<br>Access fees for certain users<br>Fees can apply to certain research projects conducted in the RDCs. Consult the Access & Fee-For-Service Policy to learn more. |
| Chile  | National Health Survey            | Absent                                                      |              | Unclear - maybe 2016/17 | Every 4 years            | Appears to exist, but cannot locate a recent copy of the survey or results. An earlier version (2009-10) suggests use of CAM was assessed, but all CAM were grouped together as one variable.<br><a href="https://www.who.int/fctc/reporting/party_reports/chile_annex1_national_health_survey_2010.pdf">https://www.who.int/fctc/reporting/party_reports/chile_annex1_national_health_survey_2010.pdf</a> | Maybe somewhere on this site (might need a Spanish-speaker):<br><a href="https://deis.minsal.cl/#estadisticas">https://deis.minsal.cl/#estadisticas</a>                                                                                                                                                                                                                                                                                                                                                                                                                                                                                                                                                                                                                                                                                                                                                                                                                                                                                                                                                                                                                                                                          |
| Cyprus | "State of health" survey          | Absent                                                      |              | 2019                    |                          |                                                                                                                                                                                                                                                                                                                                                                                                            | <a href="https://ec.europa.eu/health/sites/health/files/state/docs/2019_chp_cyprus_english.pdf">https://ec.europa.eu/health/sites/health/files/state/docs/2019_chp_cyprus_english.pdf</a><br><a href="https://www.euro.who.int/__data/assets/pdf_file/0007/355975/Health-Profile-Cyprus-Eng.pdf">https://www.euro.who.int/__data/assets/pdf_file/0007/355975/Health-Profile-Cyprus-Eng.pdf</a>                                                                                                                                                                                                                                                                                                                                                                                                                                                                                                                                                                                                                                                                                                                                                                                                                                   |

|                              |                                                                    |        |  |                                   |                                    |  |                                                                                                                                                                                                                                                                                                                                 |
|------------------------------|--------------------------------------------------------------------|--------|--|-----------------------------------|------------------------------------|--|---------------------------------------------------------------------------------------------------------------------------------------------------------------------------------------------------------------------------------------------------------------------------------------------------------------------------------|
| Democratic Republic of Congo | DHS Demographic and Health Survey                                  | Absent |  | 2013-2014                         |                                    |  | <a href="https://www.dhsprogram.com/pubs/pdf/FR300/FR300.pdf">https://www.dhsprogram.com/pubs/pdf/FR300/FR300.pdf</a>                                                                                                                                                                                                           |
| Ecuador                      | Health survey                                                      | Absent |  | 2017                              |                                    |  | <a href="https://www.ecuadorencifras.gob.ec/documentos/web-inec/Estadisticas_Sociales/Recursos_Actividades_de_Salud/RAS_2017/Principales_Resultados_%28RAS%29.pdf">https://www.ecuadorencifras.gob.ec/documentos/web-inec/Estadisticas_Sociales/Recursos_Actividades_de_Salud/RAS_2017/Principales_Resultados_%28RAS%29.pdf</a> |
| Egypt                        | DHS Demographic and Health survey                                  | Absent |  | 2015                              | 2014, 2008, 2005                   |  | <a href="https://dhsprogram.com/pubs/pdf/FR313/FR313.pdf">https://dhsprogram.com/pubs/pdf/FR313/FR313.pdf</a>                                                                                                                                                                                                                   |
| El Salvador                  | National Family Health Survey                                      | Absent |  | 2008                              |                                    |  | <a href="file:///C:/Users/User/AppData/Local/Temp/Cuestionario_El%20Salvador%202008_Nombre%20de%20variables.pdf">file:///C:/Users/User/AppData/Local/Temp/Cuestionario_El%20Salvador%202008_Nombre%20de%20variables.pdf</a>                                                                                                     |
| France                       | National Health and Nutrition Survey                               | Absent |  | 2006                              |                                    |  | <a href="file:///C:/Users/User/AppData/Local/Temp/26327_7069-rapp-inst-enns-web.pdf">file:///C:/Users/User/AppData/Local/Temp/26327_7069-rapp-inst-enns-web.pdf</a>                                                                                                                                                             |
| Greece                       | Hellenic National Nutrition and Health Survey                      | Absent |  | 2013-2015                         |                                    |  |                                                                                                                                                                                                                                                                                                                                 |
| Greece                       | World Health Survey                                                | Absent |  | 2003                              |                                    |  |                                                                                                                                                                                                                                                                                                                                 |
| Greece                       | Greek National Survey on Health and Nutrition (the HYDRIA Project) | Absent |  | 2009-2011                         |                                    |  |                                                                                                                                                                                                                                                                                                                                 |
| Hong Kong                    | Population Health Survey and Health Behaviour Survey               | Absent |  | 2018/19 (report not yet released) | 2014/15, 2003/04                   |  |                                                                                                                                                                                                                                                                                                                                 |
| India                        | DHS Demographic and Health survey                                  | Absent |  | 2019-20                           | 2015-16, 2005-06, 1998-99, 1992-93 |  |                                                                                                                                                                                                                                                                                                                                 |

|       |                                                                      |                                                       |                                                                                                                                                                                                                                                                                      |         |                                          |                                                                                                                                                                    |                                                                                                              |
|-------|----------------------------------------------------------------------|-------------------------------------------------------|--------------------------------------------------------------------------------------------------------------------------------------------------------------------------------------------------------------------------------------------------------------------------------------|---------|------------------------------------------|--------------------------------------------------------------------------------------------------------------------------------------------------------------------|--------------------------------------------------------------------------------------------------------------|
| India | NFHS - National Family Health Survey                                 | Present but combined with other health service (yoga) | Generally used when sick (household questionnaire)<br><br>Men's and women's questionnaires also asks about places to receive family planning, where they take children when sick, and a number of other specific details relating to health care utilisation around family planning. | 2019-20 | 2015-16<br>2005-06<br>1998-99<br>1992-93 | Q. When members of your household get sick, where do they generally go for treatment?<br>A. (option) Yoga and Naturopathy [also separates into public and private] | Process is unclear?<br><a href="http://rchiips.org/nfhs/data1.shtml">http://rchiips.org/nfhs/data1.shtml</a> |
| India | AHS - Annual Health Survey                                           | Absent                                                |                                                                                                                                                                                                                                                                                      |         |                                          |                                                                                                                                                                    |                                                                                                              |
| Italy | ISSP - International Social Survey Programme: Health and Health Care | Absent                                                | 12 month use                                                                                                                                                                                                                                                                         | 2011    |                                          | During the past 12 months, how often did you visit or were visited by... an [alternative/traditional/folk]health care practitioner?                                | <a href="https://search.gesis.org/research_data/ZA5800">https://search.gesis.org/research_data/ZA5800</a>    |
| Italy | Italy National Healthy Survey                                        | <b>Unknown due to survey availability</b>             |                                                                                                                                                                                                                                                                                      |         |                                          |                                                                                                                                                                    |                                                                                                              |

|             |                                                               |                                                                        |                                                                                                  |         |                                       |                                                                                                                                                                                                                                    |                                                                                                                                                                                                                                                                                                                                                                                                                                                                                                                                                                                                                                                                                             |
|-------------|---------------------------------------------------------------|------------------------------------------------------------------------|--------------------------------------------------------------------------------------------------|---------|---------------------------------------|------------------------------------------------------------------------------------------------------------------------------------------------------------------------------------------------------------------------------------|---------------------------------------------------------------------------------------------------------------------------------------------------------------------------------------------------------------------------------------------------------------------------------------------------------------------------------------------------------------------------------------------------------------------------------------------------------------------------------------------------------------------------------------------------------------------------------------------------------------------------------------------------------------------------------------------|
| Italy       | EHIS - European Health Interview Survey                       | Absent                                                                 |                                                                                                  | 2019    | 2015                                  |                                                                                                                                                                                                                                    | <a href="https://www.istat.it/en/archivio/210553">https://www.istat.it/en/archivio/210553</a>                                                                                                                                                                                                                                                                                                                                                                                                                                                                                                                                                                                               |
| Japan       | The Japan National Health and Nutrition Survey (NHNS)         | Absent                                                                 |                                                                                                  |         |                                       |                                                                                                                                                                                                                                    |                                                                                                                                                                                                                                                                                                                                                                                                                                                                                                                                                                                                                                                                                             |
| Malaysia    | National Health and Morbidity Survey                          | Absent                                                                 |                                                                                                  |         |                                       |                                                                                                                                                                                                                                    | <a href="https://iptk.moh.gov.my/images/technical_report/2020/FactSheet_BI_AUG2020.pdf">https://iptk.moh.gov.my/images/technical_report/2020/FactSheet_BI_AUG2020.pdf</a>                                                                                                                                                                                                                                                                                                                                                                                                                                                                                                                   |
| Mexico      | National Health Survey (ENSA)                                 | Present (as 'Naturista')                                               | Unclear                                                                                          | 2018-19 | 2016<br>2012<br>2006                  | Q4.8:<br><a href="https://en.www.inegi.org.mx/contenidos/programas/ensanut/2018/doc/ensanut_2018_cuestionario_hogar.pdf">https://en.www.inegi.org.mx/contenidos/programas/ensanut/2018/doc/ensanut_2018_cuestionario_hogar.pdf</a> | <a href="https://en.www.inegi.org.mx/programas/ensanut/2018/">https://en.www.inegi.org.mx/programas/ensanut/2018/</a>                                                                                                                                                                                                                                                                                                                                                                                                                                                                                                                                                                       |
| Nepal       | DHS Demographic and Health survey                             | Absent                                                                 |                                                                                                  |         |                                       |                                                                                                                                                                                                                                    |                                                                                                                                                                                                                                                                                                                                                                                                                                                                                                                                                                                                                                                                                             |
| Nepal       | Noncommunicable Disease Risk Factors: STEPS Survey Nepal 2019 | Present but combined with other health services (traditional medicine) | For specific health conditions - Normal source of treatment For smoking cessation - 12 month use | 2019    |                                       | "During the past 12 months, what did you do to try and stop smoking?"<br>"Where do you usually go for treatment or advice for you >condition<?"<br>"Where do you usually get your drugs for >condition<?"                          | <a href="https://www.who.int/docs/default-source/nepal-documents/ncds/ncd-steps-survey-2019-compressed.pdf?sfvrsn=807bc4c6_2">https://www.who.int/docs/default-source/nepal-documents/ncds/ncd-steps-survey-2019-compressed.pdf?sfvrsn=807bc4c6_2</a>                                                                                                                                                                                                                                                                                                                                                                                                                                       |
| New Zealand | New Zealand Health Survey                                     | Absent                                                                 |                                                                                                  |         |                                       |                                                                                                                                                                                                                                    | <a href="https://www.health.govt.nz/publication/questionnaires-and-content-guide-2019-20-new-zealand-health-survey">https://www.health.govt.nz/publication/questionnaires-and-content-guide-2019-20-new-zealand-health-survey</a>                                                                                                                                                                                                                                                                                                                                                                                                                                                           |
| Nigeria     | DHS Demographic and Health survey                             | Absent                                                                 |                                                                                                  |         |                                       |                                                                                                                                                                                                                                    |                                                                                                                                                                                                                                                                                                                                                                                                                                                                                                                                                                                                                                                                                             |
| Peru        | ENCUESTA DEMOGRÁFICA Y DE SALUD FAMILIAR (ENDES)              | Absent                                                                 |                                                                                                  |         |                                       |                                                                                                                                                                                                                                    | <a href="http://inei.inei.gob.pe/microdatos/">http://inei.inei.gob.pe/microdatos/</a>                                                                                                                                                                                                                                                                                                                                                                                                                                                                                                                                                                                                       |
| Portugal    | National Health Survey                                        | Absent                                                                 |                                                                                                  | 2019    | 2018<br>2017<br>2016<br>etc. annually |                                                                                                                                                                                                                                    | <a href="https://www.ine.pt/xportal/xmain?PORTLET_ID=JSP&amp;xpgid=ine_publicacoes&amp;xpid=INE&amp;PORTLET_NAME=ine_cont_header_pub_en&amp;PORTLET_UID=%23JSP%3Aine_cont_header_pub_en%23&amp;PUBLICACOESstema=00&amp;PUBLICACOESdata_inicial=01-07-2014&amp;PUBLICACOESdata_final=13-07-2021&amp;x=14&amp;y=10&amp;PUBLICACOESfreeText=health">https://www.ine.pt/xportal/xmain?PORTLET_ID=JSP&amp;xpgid=ine_publicacoes&amp;xpid=INE&amp;PORTLET_NAME=ine_cont_header_pub_en&amp;PORTLET_UID=%23JSP%3Aine_cont_header_pub_en%23&amp;PUBLICACOESstema=00&amp;PUBLICACOESdata_inicial=01-07-2014&amp;PUBLICACOESdata_final=13-07-2021&amp;x=14&amp;y=10&amp;PUBLICACOESfreeText=health</a> |

|              |                                                                                  |                                    |  |      |                         |  |                                                                                                                                                                                                                                                                                         |
|--------------|----------------------------------------------------------------------------------|------------------------------------|--|------|-------------------------|--|-----------------------------------------------------------------------------------------------------------------------------------------------------------------------------------------------------------------------------------------------------------------------------------------|
| Puerto Rico  | Unknown                                                                          |                                    |  |      |                         |  |                                                                                                                                                                                                                                                                                         |
|              | Longitudinal Monitoring Survey of HSE (health service questions in Adult survey) |                                    |  |      |                         |  |                                                                                                                                                                                                                                                                                         |
| Russia       |                                                                                  | Absent                             |  | 2019 | 1994 onward             |  | <a href="https://rlms-hse.cpc.unc.edu/">https://rlms-hse.cpc.unc.edu/</a>                                                                                                                                                                                                               |
| Russia       | Kantar National Health and Wellness Survey                                       | Unknown due to survey availability |  | 2011 |                         |  | <a href="https://www.kantar.com/expertise/health/da---real-world-data-pros-claims-and-health-records/national-health-and-wellness-survey-nhws">https://www.kantar.com/expertise/health/da---real-world-data-pros-claims-and-health-records/national-health-and-wellness-survey-nhws</a> |
| Saudi Arabia | World Health Survey Saudi Arabia (KSAWHS)                                        | Absent                             |  | 2019 |                         |  | <a href="https://www.moh.gov.sa/en/Ministry/Statistics/Population-Health-Indicators/Documents/World-Health-Survey-Saudi-Arabia.pdf">https://www.moh.gov.sa/en/Ministry/Statistics/Population-Health-Indicators/Documents/World-Health-Survey-Saudi-Arabia.pdf</a>                       |
| Saudi Arabia | Saudi Health Interview Survey                                                    | Absent                             |  | 2013 |                         |  | <a href="http://www.healthdata.org/sites/default/files/files/Projects/KSA/Saudi-Health-Interview-Survey-Results.pdf">http://www.healthdata.org/sites/default/files/files/Projects/KSA/Saudi-Health-Interview-Survey-Results.pdf</a>                                                     |
| Saudi Arabia | Saudi Health Interview Census                                                    | Unknown due to survey availability |  | 2015 |                         |  |                                                                                                                                                                                                                                                                                         |
| Slovenia     | World Health Survey                                                              | Absent                             |  |      |                         |  |                                                                                                                                                                                                                                                                                         |
| Slovenia     | European Health Interview Survey                                                 | Absent                             |  | 2007 |                         |  | <a href="https://www.stat.si/doc/pub/IVZ-angl.pdf">https://www.stat.si/doc/pub/IVZ-angl.pdf</a><br><a href="https://ec.europa.eu/eurostat/web/microdata/european-health-interview-survey">https://ec.europa.eu/eurostat/web/microdata/european-health-interview-survey</a>              |
| South Africa | South Africa Demographic and Health Survey (DHS)                                 | Absent                             |  | 2016 | 2003                    |  | <a href="https://dhsprogram.com/pubs/pdf/FR337/FR337.pdf">https://dhsprogram.com/pubs/pdf/FR337/FR337.pdf</a>                                                                                                                                                                           |
| South Africa | South African Health and Nutrition Examination Survey (SANHANES-1)               | Absent                             |  | 2012 |                         |  | <a href="file:///C:/Users/User/AppData/Local/Temp/7844.pdf">file:///C:/Users/User/AppData/Local/Temp/7844.pdf</a>                                                                                                                                                                       |
| Spain        | National Health Survey                                                           | Absent                             |  | 2017 | 2011-12<br>2006<br>2003 |  |                                                                                                                                                                                                                                                                                         |

|                                   |                                 |         |                                                                            |                              |              |                                                                                                                                                                                                                                                                   |                                                                                                                                                                                                                                                                                                                                                                                                                                                                                      |
|-----------------------------------|---------------------------------|---------|----------------------------------------------------------------------------|------------------------------|--------------|-------------------------------------------------------------------------------------------------------------------------------------------------------------------------------------------------------------------------------------------------------------------|--------------------------------------------------------------------------------------------------------------------------------------------------------------------------------------------------------------------------------------------------------------------------------------------------------------------------------------------------------------------------------------------------------------------------------------------------------------------------------------|
| Switzerland                       | Swiss Health Survey             | Present | 12 month use                                                               | 2017                         | 2012<br>2007 | How often have you been to one of the following specialists in the last 12 months:<br>Naturopath                                                                                                                                                                  | Available from the Swiss Federal Statistical Office<br><a href="http://www.bfs.admin.ch/bfs/portal/de/index/infotek/erhebungen__quelle/n/blank/blank/ess/04.html">http://www.bfs.admin.ch/bfs/portal/de/index/infotek/erhebungen__quelle/n/blank/blank/ess/04.html</a><br><br>2012 and 2007 data reported here:<br><a href="https://journals.plos.org/plosone/article?id=10.1371/journal.pone.0141985">https://journals.plos.org/plosone/article?id=10.1371/journal.pone.0141985</a> |
| United Kingdom - England          | Health Survey for England (HSE) | Absent  |                                                                            | 2019                         | Annually     |                                                                                                                                                                                                                                                                   | <a href="https://digital.nhs.uk/data-and-information/publications/statistical/health-survey-for-england/2019">https://digital.nhs.uk/data-and-information/publications/statistical/health-survey-for-england/2019</a>                                                                                                                                                                                                                                                                |
| United Kingdom - Scotland         | Scottish Health Survey          | Absent  | By health condition, 12 month use                                          | 2020                         | Annually     | Have you received any treatment advice for >insert condition< from any of the people on this card:<br>Other alternative medicine professional                                                                                                                     | <a href="https://beta.ukdataservice.ac.uk/datacatalogue/studies/study?id=8737#!/documentation">https://beta.ukdataservice.ac.uk/datacatalogue/studies/study?id=8737#!/documentation</a>                                                                                                                                                                                                                                                                                              |
| United Kingdom - Wales            | National Survey for Wales       | Absent  | By health condition, 12 month use<br><br>Non-GP primary care, 12 month use | Rolling (monthly interviews) |              | In the last 12 months, which of these kinds of treatment or management have you had for >insert condition<:<br>Complementary therapies (e.g. acupuncture, massage)<br><br>In the last 12 months, which of these services have you used for yourself:<br>Osteopath | <a href="https://gov.wales/national-survey-wales-questionnaires">https://gov.wales/national-survey-wales-questionnaires</a>                                                                                                                                                                                                                                                                                                                                                          |
| United Kingdom - Northern Ireland | Health Survey Northern Ireland  | Absent  |                                                                            | 2019-20                      | Annually     |                                                                                                                                                                                                                                                                   | <a href="https://www.data-archive.ac.uk/home">https://www.data-archive.ac.uk/home</a>                                                                                                                                                                                                                                                                                                                                                                                                |

|                                   |                                                                                                                                                       |                            |                           |         |                                        |                                                                                                                  |                                                                                                                                                                                                                                                                                    |
|-----------------------------------|-------------------------------------------------------------------------------------------------------------------------------------------------------|----------------------------|---------------------------|---------|----------------------------------------|------------------------------------------------------------------------------------------------------------------|------------------------------------------------------------------------------------------------------------------------------------------------------------------------------------------------------------------------------------------------------------------------------------|
| United Kingdom - Northern Ireland | Northern Ireland Life and Times Survey (I don't think this is actually a government survey - run by Queen's University Belfast and Ulster University) | Present - but only in 2005 | Use ever                  | 2005    | Annually, but CAM only covered in 2005 | Have you ever used naturpathy?                                                                                   | <a href="https://www.ark.ac.uk/nilt/datasets/">https://www.ark.ac.uk/nilt/datasets/</a><br><a href="https://www.ark.ac.uk/nilt/2005/Complementary_Medicine/COMTH8.html">https://www.ark.ac.uk/nilt/2005/Complementary_Medicine/COMTH8.html</a>                                     |
| Uruguay                           | Uruguay Continuous Household Survey                                                                                                                   | Absent                     |                           | 2020    | Annually                               |                                                                                                                  | <a href="https://www.ine.gub.uy/encuesta-continua-de-hogares1">https://www.ine.gub.uy/encuesta-continua-de-hogares1</a>                                                                                                                                                            |
| USA                               | National Health Interview Survey - CAM Supplement                                                                                                     | Present                    | 12 month use              | 2012    | 2007<br>2002                           |                                                                                                                  | <a href="https://www.cdc.gov/nchs/nhis/data-questionnaires-documentation.htm">https://www.cdc.gov/nchs/nhis/data-questionnaires-documentation.htm</a><br><a href="https://www.ncbi.nlm.nih.gov/pmc/articles/PMC4573565/">https://www.ncbi.nlm.nih.gov/pmc/articles/PMC4573565/</a> |
| Zambia                            | DHS Demographic and Health Survey                                                                                                                     | Absent                     |                           | 2018-19 |                                        |                                                                                                                  | <a href="https://microdata.worldbank.org/index.php/catalog/3597">https://microdata.worldbank.org/index.php/catalog/3597</a>                                                                                                                                                        |
| <b>ASSOCIATE MEMBERS</b>          |                                                                                                                                                       |                            |                           |         |                                        |                                                                                                                  |                                                                                                                                                                                                                                                                                    |
| Ireland                           | SLÁN - Survey of Lifestyle, Attitudes and Nutrition                                                                                                   | Absent                     | Use ever and 12 month use | 2007    | 2002<br>1998                           | Have you ever attended an alternative/complementary practitioner? (e.g. acupuncturist, homeopath, reflexologist) | <a href="https://www.ucd.ie/issda/data/surveyonlifestyleandattitudetonutritionslan/">https://www.ucd.ie/issda/data/surveyonlifestyleandattitudetonutritionslan/</a>                                                                                                                |
| Ireland                           | Healthy Ireland                                                                                                                                       | Absent                     |                           | 2018    | 2017<br>2016<br>2015                   |                                                                                                                  | <a href="https://www.ucd.ie/issda/data/healthyireland/">https://www.ucd.ie/issda/data/healthyireland/</a>                                                                                                                                                                          |



|                            |                                                                                                                                                                                                                                                                                                                                                                                          |        |              |         |                     |                                                                                                                                                                                                                                                                                                                                                                                        |                                                                                                                                                                                                                       |
|----------------------------|------------------------------------------------------------------------------------------------------------------------------------------------------------------------------------------------------------------------------------------------------------------------------------------------------------------------------------------------------------------------------------------|--------|--------------|---------|---------------------|----------------------------------------------------------------------------------------------------------------------------------------------------------------------------------------------------------------------------------------------------------------------------------------------------------------------------------------------------------------------------------------|-----------------------------------------------------------------------------------------------------------------------------------------------------------------------------------------------------------------------|
| Norway                     | HUNT - The Trondelag Health Study<br><br>(Norway also has research centre - NAFKAM - which conducts national surveys on CAM, but they don't cover naturopathy in their list of professions <a href="https://nafkam.no/en/report-use-complementary-and-alternative-medicine-cam-norway-2018">https://nafkam.no/en/report-use-complementary-and-alternative-medicine-cam-norway-2018</a> ) | Absent | 12 month use |         |                     | HUNT 2 - During the last 12 months, have you visited any of the following: Other treatment provider (naturopath, reflexologist....)<br><br>HUNT 3, CAM suppl - How many times in the last 12 months have you been to an alternative practitioner? Which type of alternative treatment did you receive and who did you receive the treatment from?: Other type of alternative treatment | <a href="https://www.ntnu.edu/hunt/research">https://www.ntnu.edu/hunt/research</a><br><a href="https://www.ntnu.edu/hunt/data/que">https://www.ntnu.edu/hunt/data/que</a>                                            |
| Singapore                  | National Population Health Survey                                                                                                                                                                                                                                                                                                                                                        | Absent |              | 2018-19 | 2016-17             |                                                                                                                                                                                                                                                                                                                                                                                        | <a href="https://www.moh.gov.sg/docs/librariesprovider5/default-document-library/nphs-2019-survey-report.pdf">https://www.moh.gov.sg/docs/librariesprovider5/default-document-library/nphs-2019-survey-report.pdf</a> |
| Singapore                  | National Health Surveillance Survey                                                                                                                                                                                                                                                                                                                                                      | Absent |              | 2007    | 2001                |                                                                                                                                                                                                                                                                                                                                                                                        | <a href="https://www.singstat.gov.sg/find-data/search-by-theme/society/health/latest-data">https://www.singstat.gov.sg/find-data/search-by-theme/society/health/latest-data</a>                                       |
| Singapore                  | Singapore National Health Survey                                                                                                                                                                                                                                                                                                                                                         | Absent |              | 2010    | 2004<br>1998        |                                                                                                                                                                                                                                                                                                                                                                                        | <a href="https://www.singstat.gov.sg/find-data/search-by-theme/society/health/latest-data">https://www.singstat.gov.sg/find-data/search-by-theme/society/health/latest-data</a>                                       |
| <b>EDUCATIONAL MEMBERS</b> |                                                                                                                                                                                                                                                                                                                                                                                          |        |              |         |                     |                                                                                                                                                                                                                                                                                                                                                                                        |                                                                                                                                                                                                                       |
| Czech Republic             | HELEN (Health, Lifestyle and Environment) Study                                                                                                                                                                                                                                                                                                                                          | Absent |              | 2014    | Annually since 2003 |                                                                                                                                                                                                                                                                                                                                                                                        | <a href="http://www.szu.cz/publikace/studie-helen?lang=1">http://www.szu.cz/publikace/studie-helen?lang=1</a>                                                                                                         |
| Czech Republic             | World Health Survey                                                                                                                                                                                                                                                                                                                                                                      | Absent |              | 2003    |                     |                                                                                                                                                                                                                                                                                                                                                                                        | <a href="https://microdata.worldbank.org/index.php/catalog/1703">https://microdata.worldbank.org/index.php/catalog/1703</a>                                                                                           |
| Ghana                      | DHS Demographic and Health Survey                                                                                                                                                                                                                                                                                                                                                        | Absent |              | 2017    | 2014                |                                                                                                                                                                                                                                                                                                                                                                                        | <a href="https://dhsprogram.com/methodology/survey/survey-display-506.cfm">https://dhsprogram.com/methodology/survey/survey-display-506.cfm</a>                                                                       |
